# Supplementary material
Source: PubMed Central journal article supplement (PMC4159642)

## Legends to supplemental Figures

**Supplemental Figure 1: Annotation of Srr1 sequence.** The following colour code was used. Blue: signal peptide, yellow: peptide detected in MS experiments, gray: identified glycopeptide, green: LPXTG motif.

**Supplemental Figures 2a to 2d: Automated identification of peptides after neutral loss event using X! Tandem .** Detection parameters were set to detect fragmentation ions at low signal to noise ratio.

Supplemental Fig 2a: neutral loss of HexNAc on [234-247] peptide.

Supplemental Fig 2b: neutral Loss of HexNAc on [275-285] peptide.

Supplemental Fig 2c: neutral Loss of HexNAc on [214-233] peptide.

Supplemental Fig 2d: neutral Loss of O-AcHexNAc on [214-233] peptide.

The figures were obtained with the Global Proteome Machine XML data viewer.

([http://bacteria.thegpm.org/tandem/thegpm\\_upview.html](http://bacteria.thegpm.org/tandem/thegpm_upview.html)).

**Supplemental Figures 3a-3t: CID MS/MS spectra of glycopeptides described in**

**Table 1.** Glycan symbols: HexNAc (Square), Hex (Circle), O-AcHexNAc (Crossed square).

**Supplemental Figure 4: Successive neutral loss events of [192-211] peptide modified with +3(HexNAc) detected by CID MS/MS cycles on LTQ-Orbitrap.** Precursor ion m/z 911.4414 z=3. Sample Srr1 MSn4. Scan 2236-2240. Peak noted \* corresponds to the most abundant ion selected for next CID event.

**Supplemental Figures 5a-5ag: HCD MS/MS spectra of glycopeptides described in Table 2.** Glycan symbols: HexNAc (Square), Hex (Circle), O-AcHexNAc (Crossed square).

**Supplemental Figure 6: Extracted ion chromatograms (XIC) of MS spectra of non-glycosylated and glycosylated forms of peptide [192-211] peptide described in Table 2.** The reported data were extracted in the time window 29-39 min. The glycan modification is reported in each panel.

**Supplemental figure 7: SDS PAGE of medium after overnight cultures of *S. agalactiae*** (A) strain H36B *srtA*\* and (B) strain H36B *srtA*\*  $\Delta$ *gtfCH*. Gel was stained with Coomassie Blue. Arrowheads points to Srr1 bands which were analyzed by MS. Note the apparent molecular weight difference between the two proteins which likely reflects the glycosylation default in H36B *srtA*\* $\Delta$ *gtfCH*.

**Supplemental Figures 8a to 8j: ETD MS/MS spectra of glycopeptides described in**

**Table 3.** The deduced glycosylation sites are underlined.  $Z' = Z + H$ .

MSQKTFGKQLTVVDTKSRVKMHKSGKNWVRTVM SHFNLFKAIKGRATVEADVCIQDVEKEDRLSSGNLTYLKGI  
LAAGALVGGASLTSRVYADETPVVQEQQSSSVPTLAEQTEVTVKTTTVQNHQDGTVSKNIIDSNSVSMSESASTS  
TSESVSMMSGSTLTSVSESVSTSALTSASESISTSA SESVSKSTSISEVSNILETQASLTDKGRESFSANQIV  
TESSLVTDAGKNASVSSLIEITKPKSELQTSKMSNESLITPEKSQVMIASDKTGNESLTP TIRLKSVIQPRSMN  
LMTLSSEMDLI PLEEVSDTEMLGKDV SSELQKVNIALKDNTLSEPGTVKLD SSENVLNFAFSIASVNEG DVFT  
VKLSDNLD TQGIGTILKVQDIMDET GQLLATGSYSPLTHNITYTWTRYASTLNNIKARVNMPVWPDQRIISKTT  
SDKQCFTATLNNQVASIEERVQYN SPSVTEHTNVKTNVRSRIMKLDDERQTETYITQINPEGKEMYFASGLGNL  
YTIIGSDGTSGSPVNLLNAEVKILKTNSKNLTD SMDQNYDSPEFEDVTSQYSY TNDGSKITIDWKTNSISSTTS  
YVVLVKIPKQSGVLYSTVSDINQTYGSKYSYGH TNISGDSDANA EIKLLSESASTSASTSASTSASMSASTSAS  
TSASMSASTSASTSASMSASMSASTSASMSASTSASTSASMSASMSASTSASMSASTSASTSASTSASMSASTS  
ASTSASTSASTSASTSTSTSTSTSTSTSTSTSTSTSTSTSTSTSTSTSTSTSTSTSTSTSTSTSTSTSTSTSTST  
TSASTSASTSASTSASTSASTSASTSASTSASTSASTSASTSASTSASTSASTSASTSASTSASTSASTSASTS  
ASTSASTSASTSASTSASTSASTSASTSASTSASTSASTSASTSASTSASTSASTSASTSASTSASTSASTS  
MSASTSASTSASTSASTSASTSASTSASTSASTSASTSASTSASTSASTSASTSASTSASTSASTSASTSASTS  
ASTSASTSASTSASTSASTSASTSASTSASTSASTSASTSASTSASTSASTSASTSASTSASTSASTSASTS  
TSASTSASTSASTSASTSASTSASTSASTSASTSASTSASTSASTSASTSASTSASTSASTSASTSASTSASTS  
ASTSASTSASTSASTSASTSASTSASTSASTSASTSASTSASTSASTSASTSASTSASTSASTSASTSASTS  
MSASTSASTSASTSASTSASTSASTSASTSASTSASTSASTSASTSASTSASTSASTSASTSASTSASTSASTS  
MSASTSASTSASTSASTSASTSASTSASTSASTSASTSASTSASTSASTSASTSASTSASTSASTSASTSASTS

SKKDKN covered sequence

SKKDKN LPXTG site

SKKDKN Signal peptide

MSNESLITPEK Glycopeptide identified in the present study

### Supplemental Figure 1



NASVSSLIEITKPK+ (HexNAc)1,  
m/z [2+] = 743.92

# 1633  
log (e) -5  
log (I) 4.25  
m+h 1689.9273  
delta 0.0001

N-A-S-V-S-S-L-I-E-I-T-K-P-K

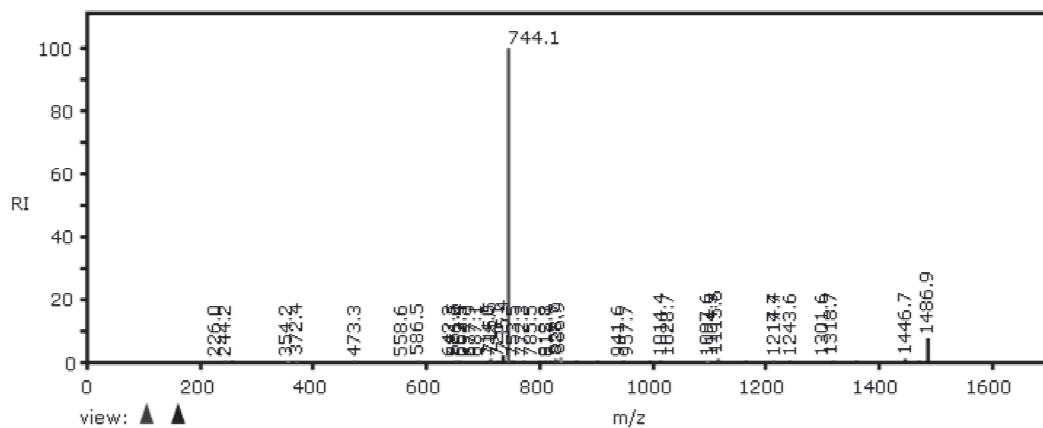

matched/total: # ions: 48% intensity: 91% σ: 0.16 Da

| bond            | +1y                      | +1y-17   | +1y-18   | +1b                      | +1b-17   | +1b-18   |
|-----------------|--------------------------|----------|----------|--------------------------|----------|----------|
| N <sub>1</sub>  | 1575.884                 | 1558.858 | 1557.874 | 115.05                   | 98.024   | 97.04    |
| A <sub>2</sub>  | 1504.847                 | 1487.821 | 1486.837 | 186.087                  | 169.061  | 168.077  |
| S <sub>3</sub>  | 1417.815 <sup>2+</sup>   | 1400.789 | 1399.805 | 273.119                  | 256.093  | 255.109  |
| V <sub>4</sub>  | 1318.747 <sup>+1,2</sup> | 1301.72  | 1300.736 | 372.188                  | 355.161  | 354.177  |
| S <sub>5</sub>  | 1231.715                 | 1214.688 | 1213.704 | 459.22                   | 442.193  | 441.209  |
| S <sub>6</sub>  | 941.603                  | 924.577  | 923.593  | 749.331                  | 732.305  | 731.321  |
| L <sub>7</sub>  | 828.519                  | 811.493  | 810.509  | 862.415                  | 845.389  | 844.405  |
| I <sub>8</sub>  | 715.435                  | 698.409  | 697.425  | 975.499                  | 958.473  | 957.489  |
| E <sub>9</sub>  | 586.393                  | 569.366  | 568.382  | 1104.542                 | 1087.515 | 1086.531 |
| I <sub>10</sub> | 473.309                  | 456.282  | 455.298  | 1217.626                 | 1200.6   | 1199.616 |
| T <sub>11</sub> | 372.261                  | 355.234  | 354.25   | 1318.674 <sup>+1,2</sup> | 1301.647 | 1300.663 |
| K <sub>12</sub> | 244.166                  | 227.139  | 226.155  | 1446.769                 | 1429.742 | 1428.758 |
| P <sub>13</sub> | 147.113                  | 130.087  | 129.103  | 1543.821 <sup>+2</sup>   | 1526.795 | 1525.811 |

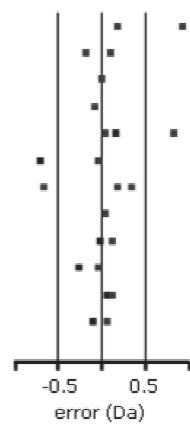

Other observed ions:

| Ion type                                 | m/z      |
|------------------------------------------|----------|
| by[12-14]                                | 354.25   |
| ay[5-10]                                 | 818.451  |
| ay[2-8]                                  | 833.461  |
| by[3-13]                                 | 1358.741 |
| ay[4-13]                                 | 1243.714 |
| by[3-14]                                 | 1486.836 |
| (parent-NH <sub>3</sub> ) <sup>+2</sup>  | 836.954  |
| (parent-K) <sup>+2</sup>                 | 772.415  |
| (parent-2NH <sub>3</sub> ) <sup>+2</sup> | 828.441  |
| (parent-H <sub>2</sub> O) <sup>+2</sup>  | 836.462  |

Supplemental Figure 2a

TGNESLTPTIR+ (HexNAc)1  
m/z [2+] = 594.81

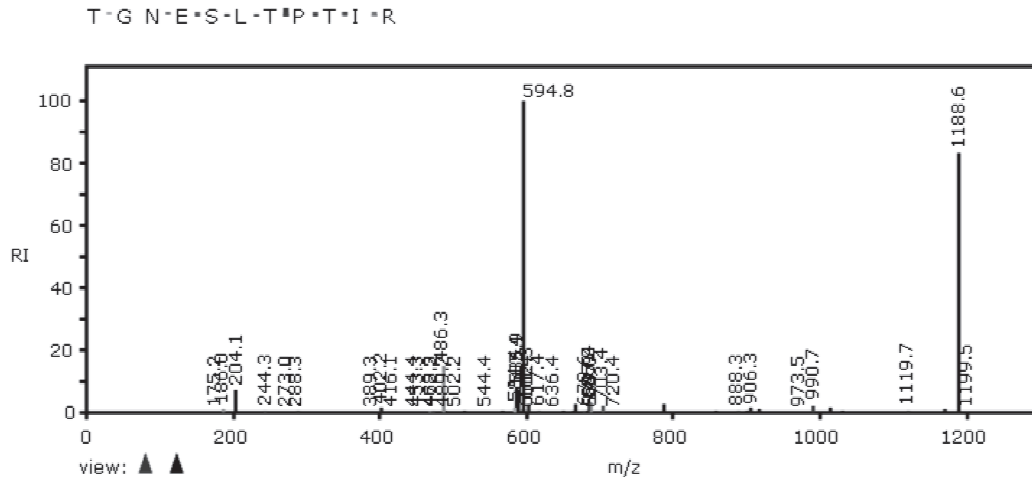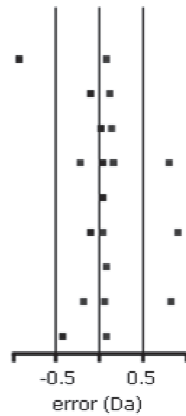

| #    | log (e) | log (I) | m+h       | delta  |
|------|---------|---------|-----------|--------|
| 1219 | -2.1    | 4.69    | 1391.7017 | 0.0006 |

| matched/total:  | # ions: 38% | intensity: 14% | σ: 0.40 Da |              |          |          |
|-----------------|-------------|----------------|------------|--------------|----------|----------|
| bond            | +1y         | +1y-17         | +1y-18     | +1b          | +1b-17   | +1b-18   |
| T <sub>1</sub>  | 1290.654    | 1273.627       | 1272.643   | 102.055      | 85.029   | 84.045   |
| G <sub>2</sub>  | 1233.632 +2 | 1216.606       | 1215.621   | 159.077      | 142.05   | 141.066  |
| N <sub>3</sub>  | 1119.589    | 1102.563       | 1101.579   | 273.119      | 256.093  | 255.109  |
| E <sub>4</sub>  | 990.547     | 973.52         | 972.536    | 402.162      | 385.136  | 384.151  |
| S <sub>5</sub>  | 903.515     | 886.488        | 885.504    | 489.194      | 472.168  | 471.184  |
| L <sub>6</sub>  | 790.43      | 773.404        | 772.42     | 602.278      | 585.252  | 584.268  |
| T <sub>7</sub>  | 486.304     | 469.277        | 468.293    | 906.405 +1,2 | 889.378  | 888.394  |
| P <sub>8</sub>  | 389.251     | 372.224        | 371.24     | 1003.458 +2  | 986.431  | 985.447  |
| T <sub>9</sub>  | 288.203     | 271.177        | 270.193    | 1104.505     | 1087.479 | 1086.495 |
| I <sub>10</sub> | 175.119     | 158.093        | 157.109    | 1217.589     | 1200.563 | 1199.579 |

Other observed ions:

| Ion type                                 | m/z      |
|------------------------------------------|----------|
| by[3-4]                                  | 244.093  |
| ay[2-4]                                  | 273.119  |
| by[7-8]                                  | 402.187  |
| by[3-6]                                  | 444.209  |
| ay[3-6]                                  | 416.214  |
| by[5-8]                                  | 602.303  |
| by[8-11]                                 | 468.293  |
| ay[4-8]                                  | 703.35   |
| by[5-9]                                  | 703.35   |
| ay[3-7]                                  | 720.341  |
| (parent-H <sub>2</sub> O) <sup>+2</sup>  | 687.349  |
| (parent-2H <sub>2</sub> O) <sup>+2</sup> | 678.841  |
| (parent-NH <sub>3</sub> ) <sup>+2</sup>  | 687.8411 |

Supplemental Figure 2b

ESFSANQIVTESSLVTDAGK + (HexNAc)1  
m/z [2+] = 1042.01

# 2102    log (e) -7.2    log (I) 4.69    m+h 2286.0988    delta -0.003

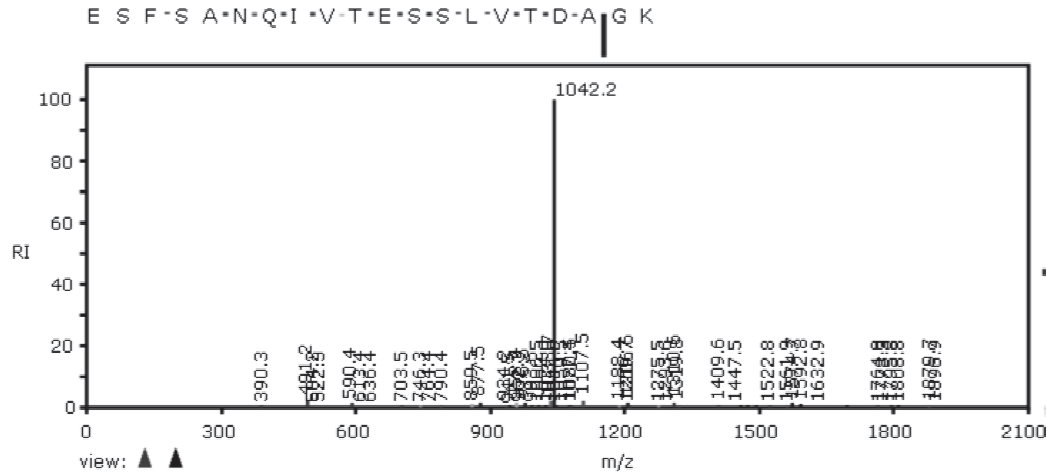

| matched/total:  | # ions: 72% | intensity: 95% |          |                        | o: 0.07 Da |          |
|-----------------|-------------|----------------|----------|------------------------|------------|----------|
| bond            | +1y         | +1y-17         | +1y-18   | +1b                    | +1b-17     | +1b-18   |
| E <sub>1</sub>  | 2157.056    | 2140.03        | 2139.045 | 130.05                 | 113.023    | 112.039  |
| S <sub>2</sub>  | 2070.024    | 2052.997       | 2052.013 | 217.082                | 200.055    | 199.071  |
| F <sub>3</sub>  | 1922.956    | 1905.929       | 1904.945 | 364.15                 | 347.124    | 346.14   |
| S <sub>4</sub>  | 1835.924    | 1818.897       | 1817.913 | 451.182                | 434.156    | 433.172  |
| A <sub>5</sub>  | 1764.886    | 1747.86        | 1746.876 | 522.22                 | 505.193    | 504.209  |
| N <sub>6</sub>  | 1650.844    | 1633.817       | 1632.833 | 636.262                | 619.236    | 618.252  |
| Q <sub>7</sub>  | 1522.785    | 1505.758       | 1504.774 | 764.321                | 747.295    | 746.311  |
| I <sub>8</sub>  | 1409.701    | 1392.674       | 1391.69  | 877.405                | 860.379    | 859.395  |
| V <sub>9</sub>  | 1310.632    | 1293.606       | 1292.622 | 976.474                | 959.447    | 958.463  |
| T <sub>10</sub> | 1209.585    | 1192.558       | 1191.574 | 1077.521               | 1060.495   | 1059.511 |
| E <sub>11</sub> | 1080.542    | 1063.516       | 1062.532 | 1206.564               | 1189.537   | 1188.553 |
| S <sub>12</sub> | 993.51      | 976.484        | 975.5    | 1293.596               | 1276.569   | 1275.585 |
| S <sub>13</sub> | 703.399     | 686.372        | 685.388  | 1583.707               | 1566.681   | 1565.697 |
| L <sub>14</sub> | 590.315     | 573.288        | 572.304  | 1696.791               | 1679.765   | 1678.781 |
| V <sub>15</sub> | 491.246     | 474.22         | 473.236  | 1795.86                | 1778.833   | 1777.849 |
| T <sub>16</sub> | 390.199     | 373.172        | 372.188  | 1896.907               | 1879.881   | 1878.897 |
| D <sub>17</sub> | 275.172     | 258.145        | 257.161  | 2011.934 <sup>+2</sup> | 1994.908   | 1993.924 |
| A <sub>18</sub> | 204.135     | 187.108        | 186.124  | 2082.971 <sup>+2</sup> | 2065.945   | 2064.961 |
| G <sub>19</sub> | 147.113     | 130.087        | 129.103  | 2139.993               | 2122.966   | 2121.982 |

Other observed ions:

| Ion type  | m/z      |
|-----------|----------|
| by[12-14] | 491.235  |
| by[13-18] | 790.383  |
| by[12-19] | 934.436  |
| ay[7-14]  | 1033.541 |
| by[3-12]  | 1077.521 |
| by[10-18] | 1107.505 |
| by[8-18]  | 1319.658 |
| by[5-17]  | 1561.759 |
| by[3-17]  | 1795.86  |
| by[12-15] | 590.303  |
| by[12-18] | 877.415  |
| by[11-18] | 1006.458 |
| by[2-11]  | 1077.521 |
| ay[9-17]  | 1107.542 |
| by[9-18]  | 1206.574 |
| by[7-18]  | 1447.716 |
| by[6-18]  | 1561.759 |

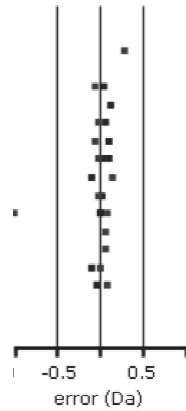

Supplemental Figure 2c

ESFSANQIVTESSLVTDAGK + (O-AcHexNAc)1  
m/z [2+] = 1042.01

# 2194  
log (e) -8.8  
log (I) 3.71  
m+h 2328.1107  
delta -0.0047

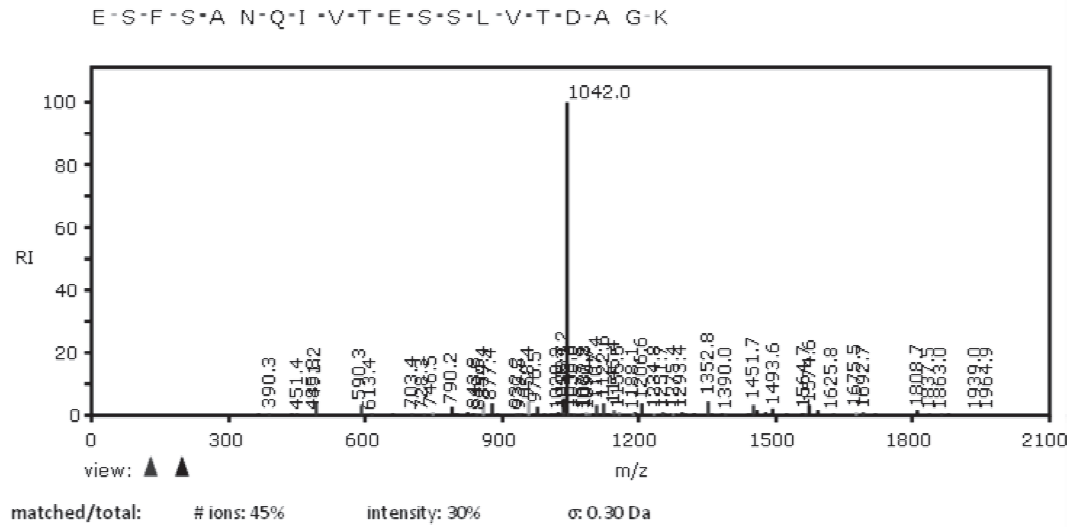

| matched/total:  | # ions: 52% | intensity: 28% |          |          | $\sigma$ : 0.10 Da |          |
|-----------------|-------------|----------------|----------|----------|--------------------|----------|
| bond            | +1y         | +1y-17         | +1y-18   | +1b      | +1b-17             | +1b-18   |
| E <sub>1</sub>  | 2199.067    | 2182.04        | 2181.056 | 130.05   | 113.023            | 112.039  |
| S <sub>2</sub>  | 2112.035    | 2095.008       | 2094.024 | 217.082  | 200.055            | 199.071  |
| F <sub>3</sub>  | 1964.966    | 1947.94        | 1946.956 | 364.15   | 347.124            | 346.14   |
| S <sub>4</sub>  | 1877.934    | 1860.908       | 1859.924 | 451.182  | 434.156            | 433.172  |
| A <sub>5</sub>  | 1806.897    | 1789.87        | 1788.886 | 522.22   | 505.193            | 504.209  |
| N <sub>6</sub>  | 1692.854    | 1675.828       | 1674.844 | 636.262  | 619.236            | 618.252  |
| Q <sub>7</sub>  | 1564.796    | 1547.769       | 1546.785 | 764.321  | 747.295            | 746.311  |
| I <sub>8</sub>  | 1451.711    | 1434.685       | 1433.701 | 877.405  | 860.379            | 859.395  |
| V <sub>9</sub>  | 1352.643    | 1335.617       | 1334.632 | 976.474  | 959.447            | 958.463  |
| T <sub>10</sub> | 1251.595    | 1234.569       | 1233.585 | 1077.521 | 1060.495           | 1059.511 |
| E <sub>11</sub> | 1122.553    | 1105.526       | 1104.542 | 1206.564 | 1189.537           | 1188.553 |
| S <sub>12</sub> | 1035.521    | 1018.494       | 1017.51  | 1293.596 | 1276.569           | 1275.585 |
| S <sub>13</sub> | 703.399     | 686.372        | 685.388  | 1625.718 | 1608.691           | 1607.707 |
| L <sub>14</sub> | 590.315     | 573.288        | 572.304  | 1738.802 | 1721.775           | 1720.791 |
| V <sub>15</sub> | 491.246     | 474.22         | 473.236  | 1837.87  | 1820.844           | 1819.86  |
| T <sub>16</sub> | 390.199     | 373.172        | 372.188  | 1938.918 | 1921.891           | 1920.907 |
| D <sub>17</sub> | 275.172     | 258.145        | 257.161  | 2053.945 | 2036.918           | 2035.934 |
| A <sub>18</sub> | 204.135     | 187.108        | 186.124  | 2124.982 | 2107.955           | 2106.971 |
| G <sub>19</sub> | 147.113     | 130.087        | 129.103  | 2182.003 | 2164.977           | 2163.993 |

Other observed ions:

| ion type                                 | m/z      |
|------------------------------------------|----------|
| by[4-11]                                 | 843.421  |
| by[12-19]                                | 976.447  |
| (parent-2H <sub>2</sub> O) <sup>+2</sup> | 1146.548 |
| by[10-19]                                | 1206.537 |
| ay[7-16]                                 | 1275.668 |
| by[5-12]                                 | 843.421  |
| ay[8-15]                                 | 1046.562 |
| (parent-H <sub>2</sub> O) <sup>+2</sup>  | 1155.553 |
| ay[4-13]                                 | 1234.58  |

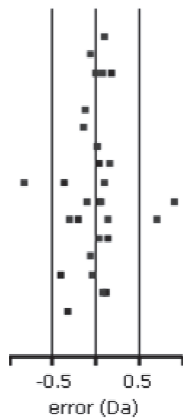

Supplemental Figure 2d

Supplemental Figure 3a

STSISEVSNILETQASLTDK nude  
m/z =1062.54 (z=2) scan 2385 RT 28.81

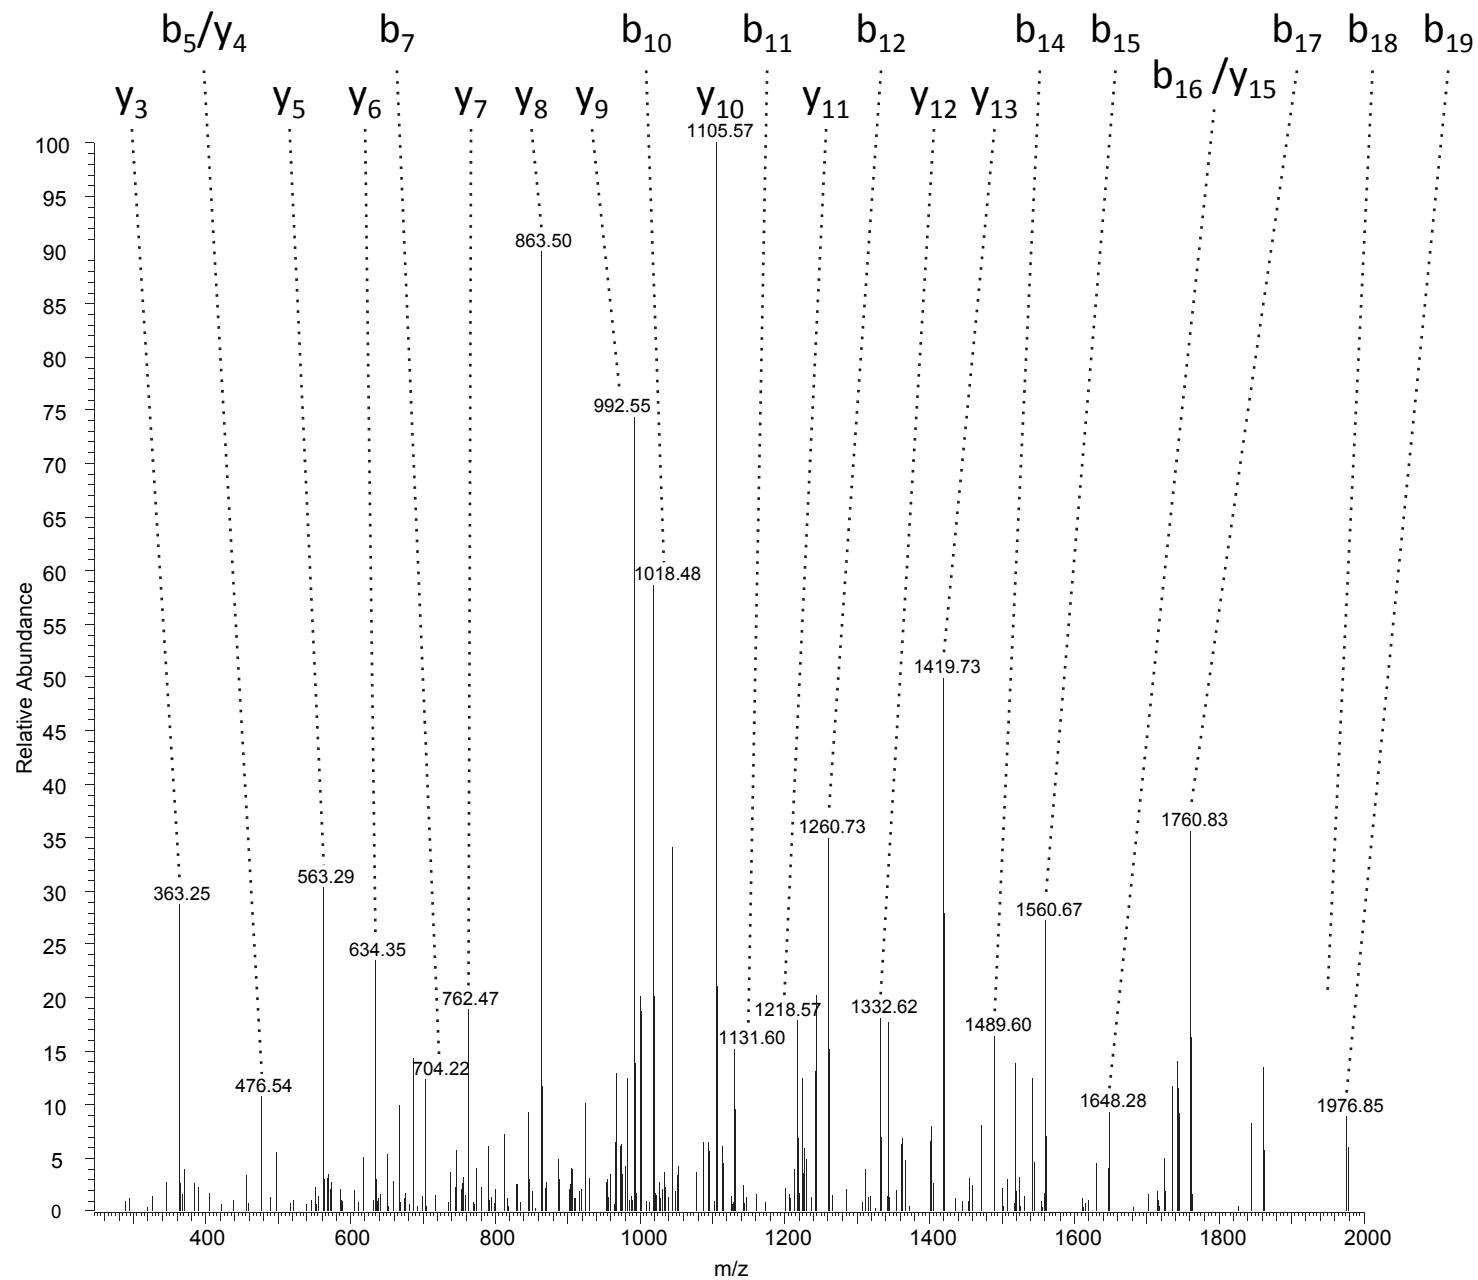

Supplemental Figure 3b

**STSISEVSNILETQASLTDK +(HexNAc)**  
**m/z =1163.57 (z=2), scan 2383 RT 27.22**

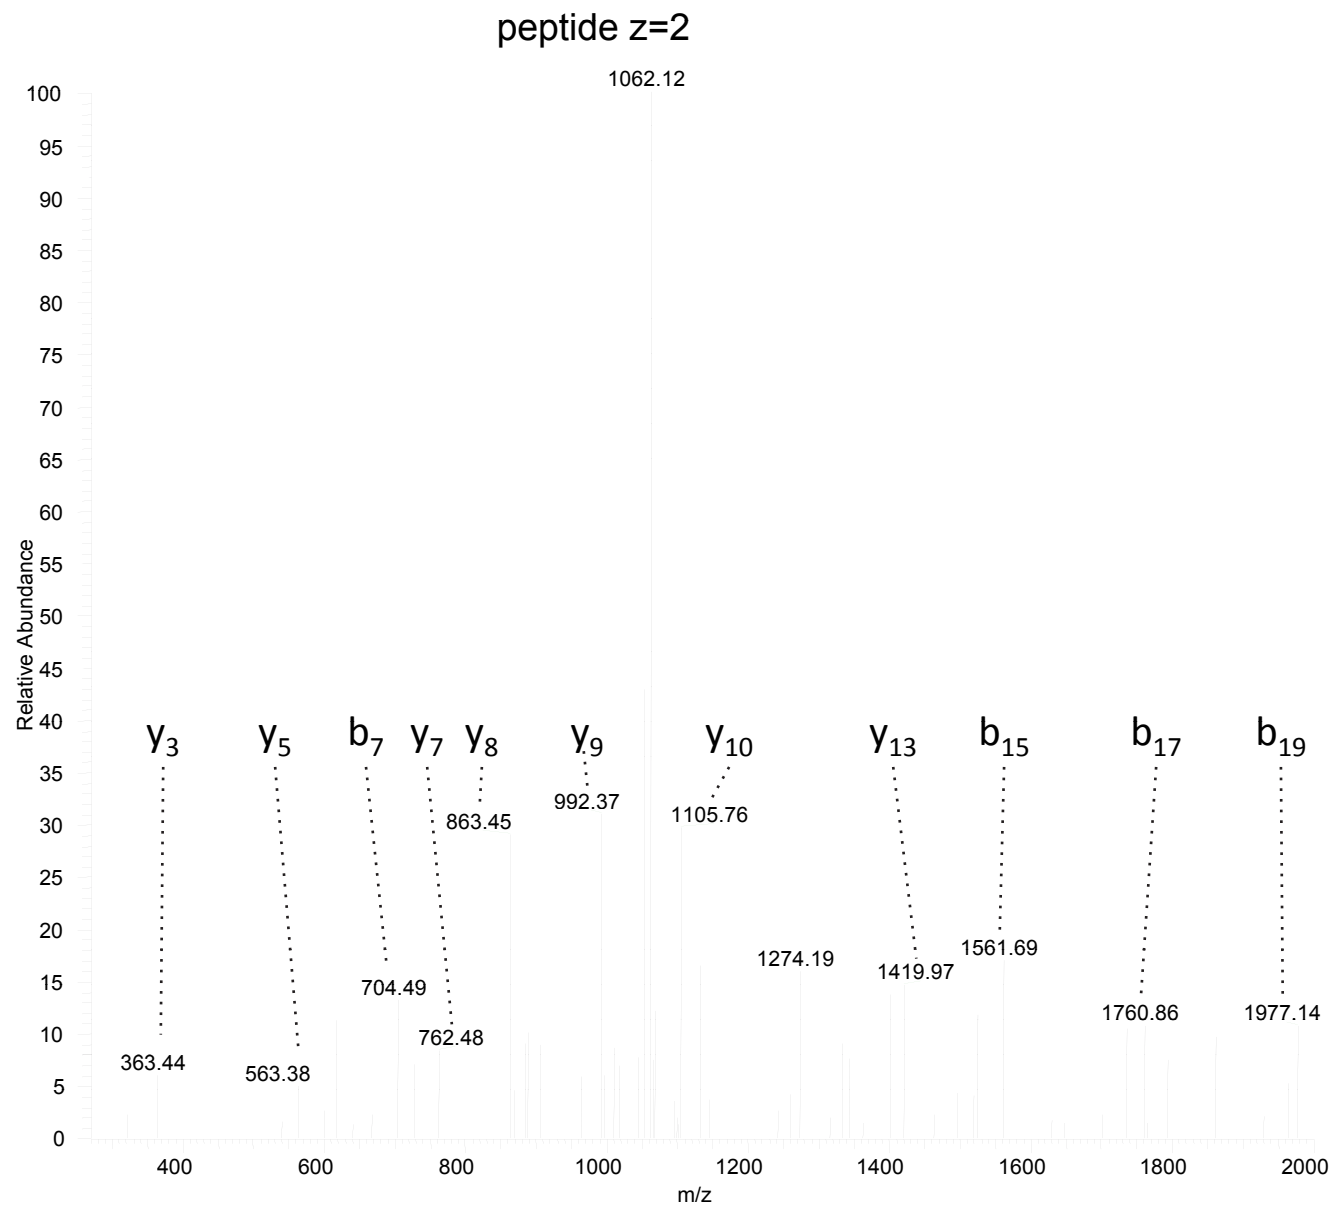

Supplemental Figure 3c

STSISEVSNILETQASLTDK +(HexNAc)<sub>2</sub>  
m/z=1265.61 z=2, scan 2299 RT 26.53

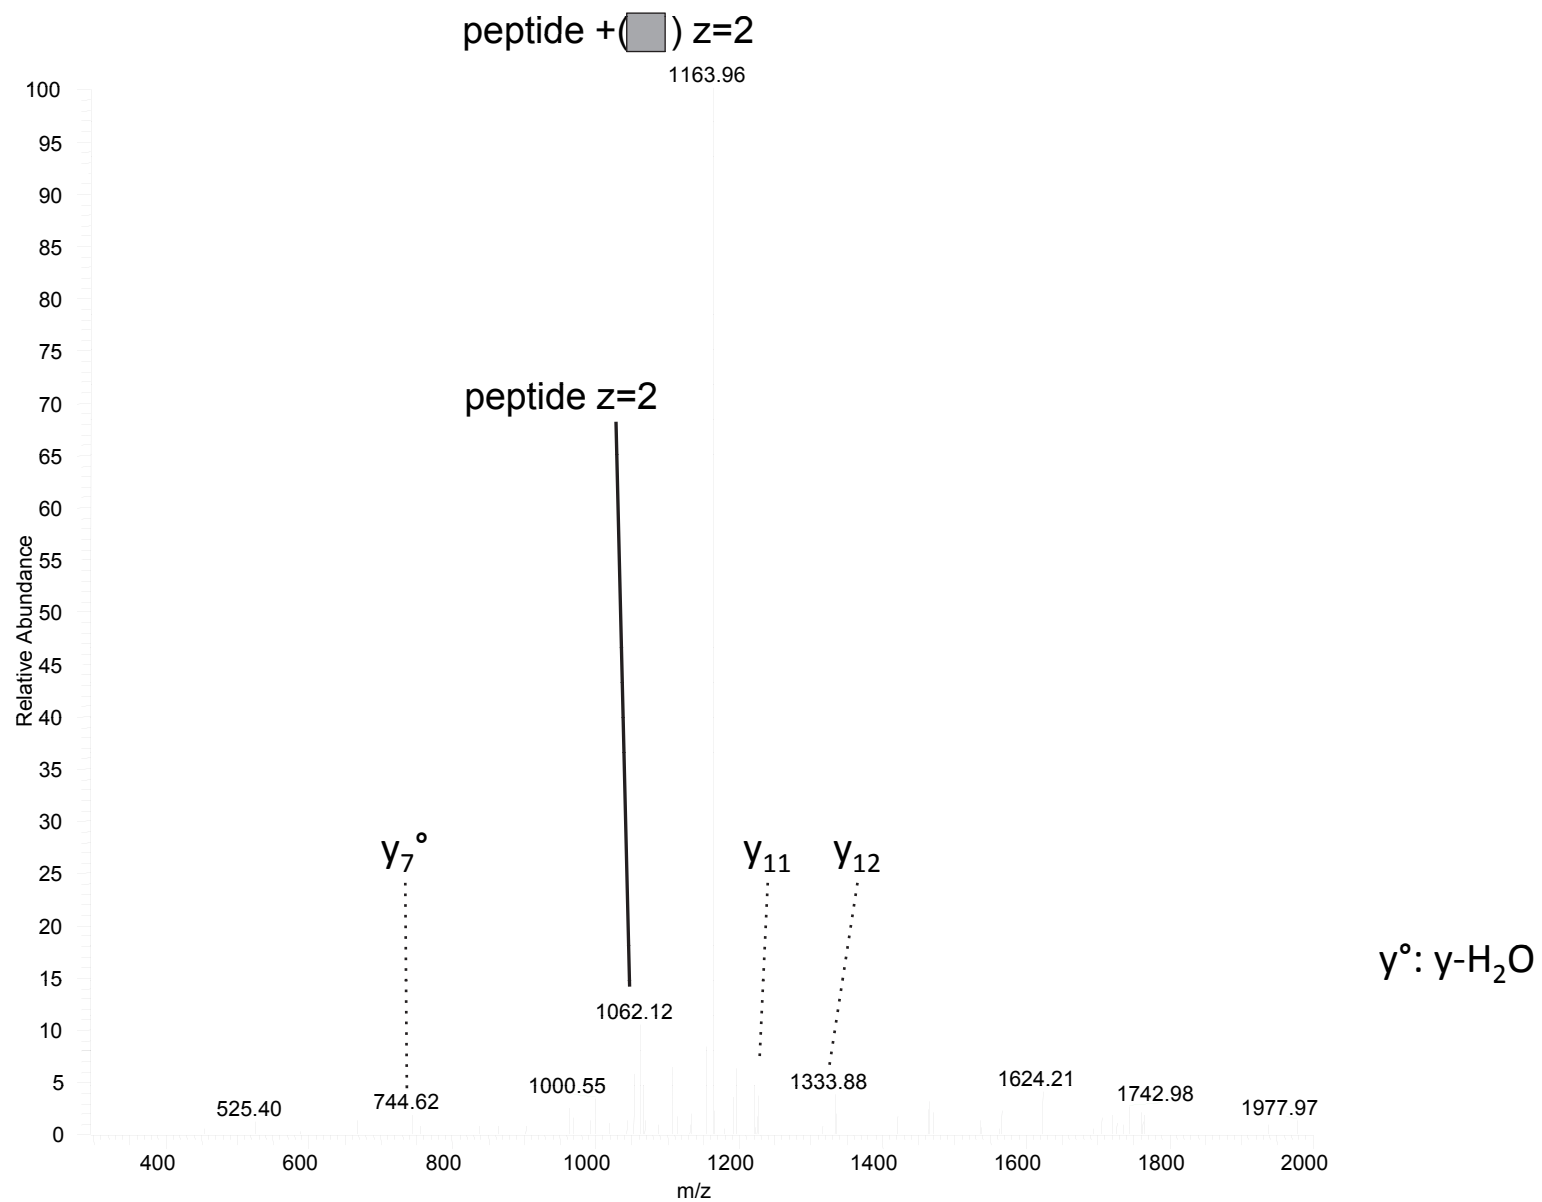

Supplemental Figure 3d

STSISEVSNILETQASLTDK +(HexNAc)<sub>3</sub>  
m/z= 912.11, z=3, scan 2245 RT 26.13

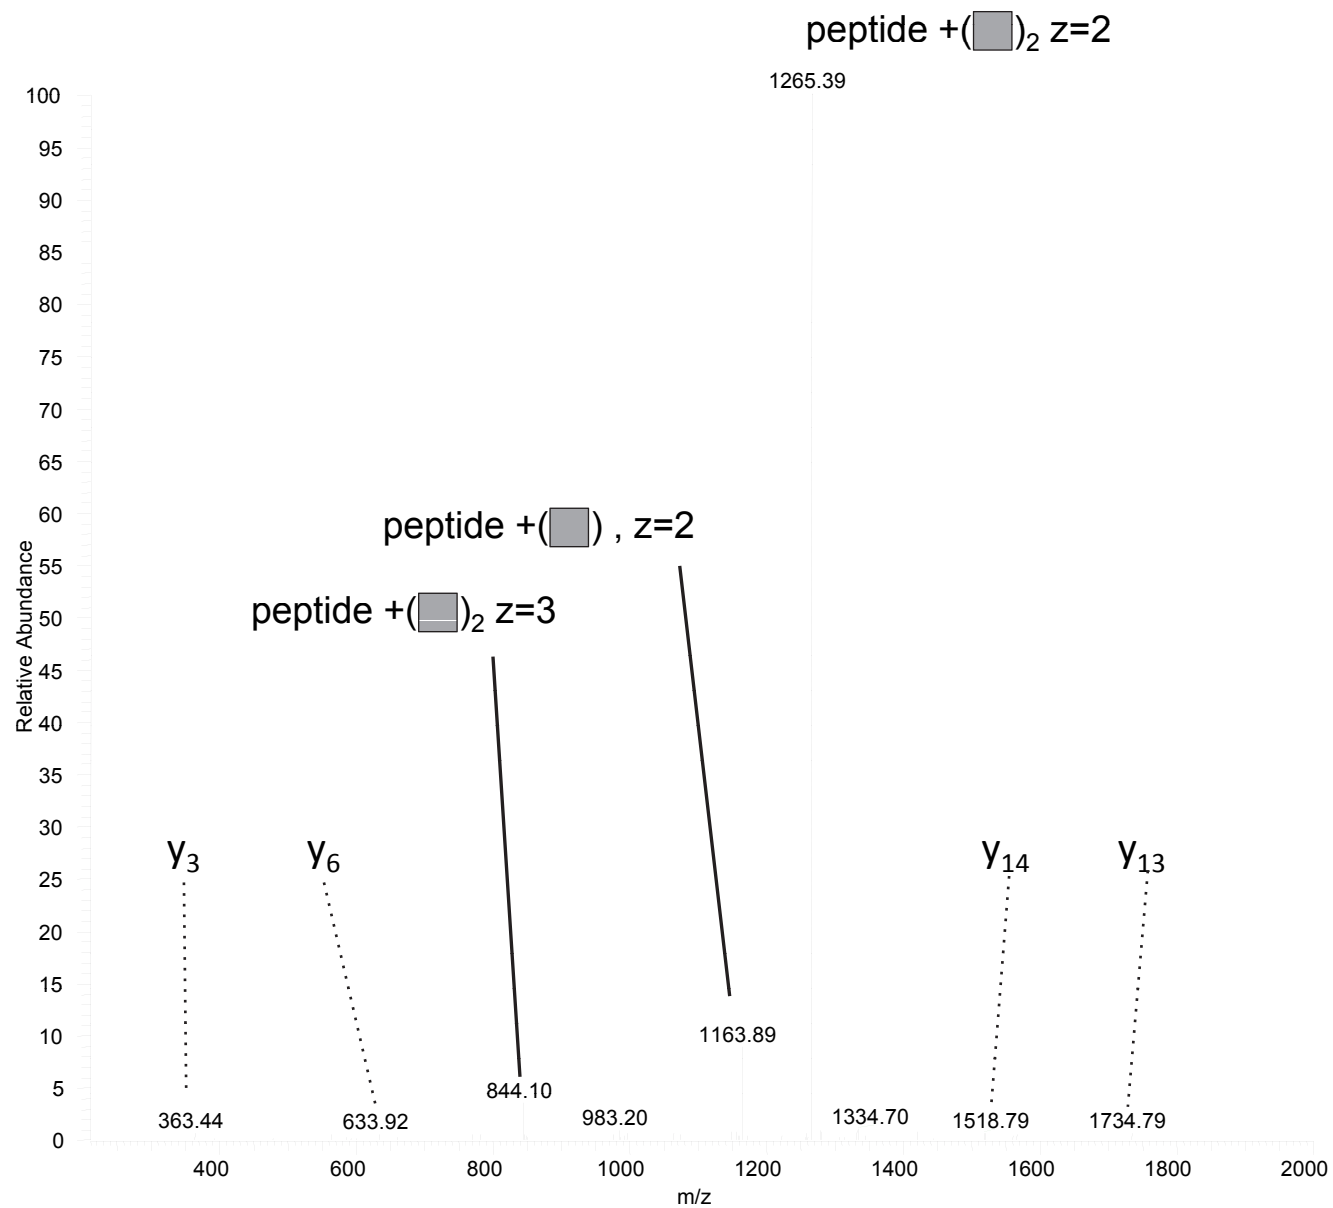



Supplemental Figure 3e

STSISEVSNILETQASLTDK +(HexNAc)<sub>4</sub>  
m/z= 979.46 z=3, scan 1946 RT 23.83

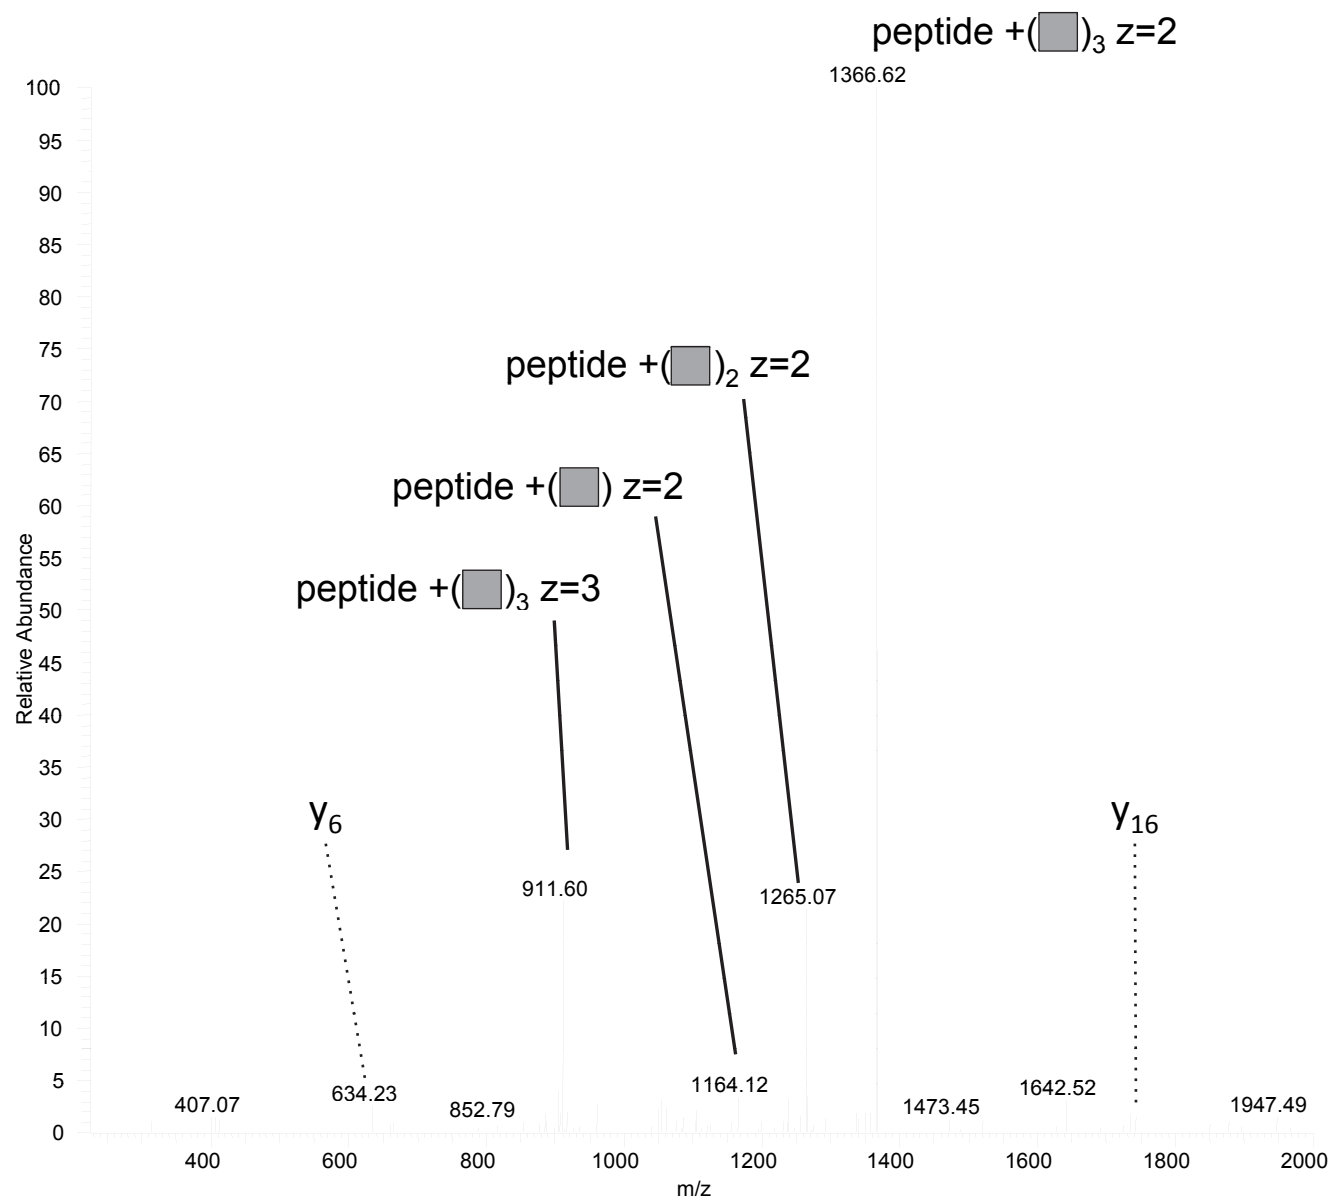

Supplemental Figure 3f

STSISEVSNILETQASLTDK +(HexNAc)<sub>4</sub> (Hex)<sub>2</sub>  
m/z= 1088.17 z=3, scan 1883 RT 23.36

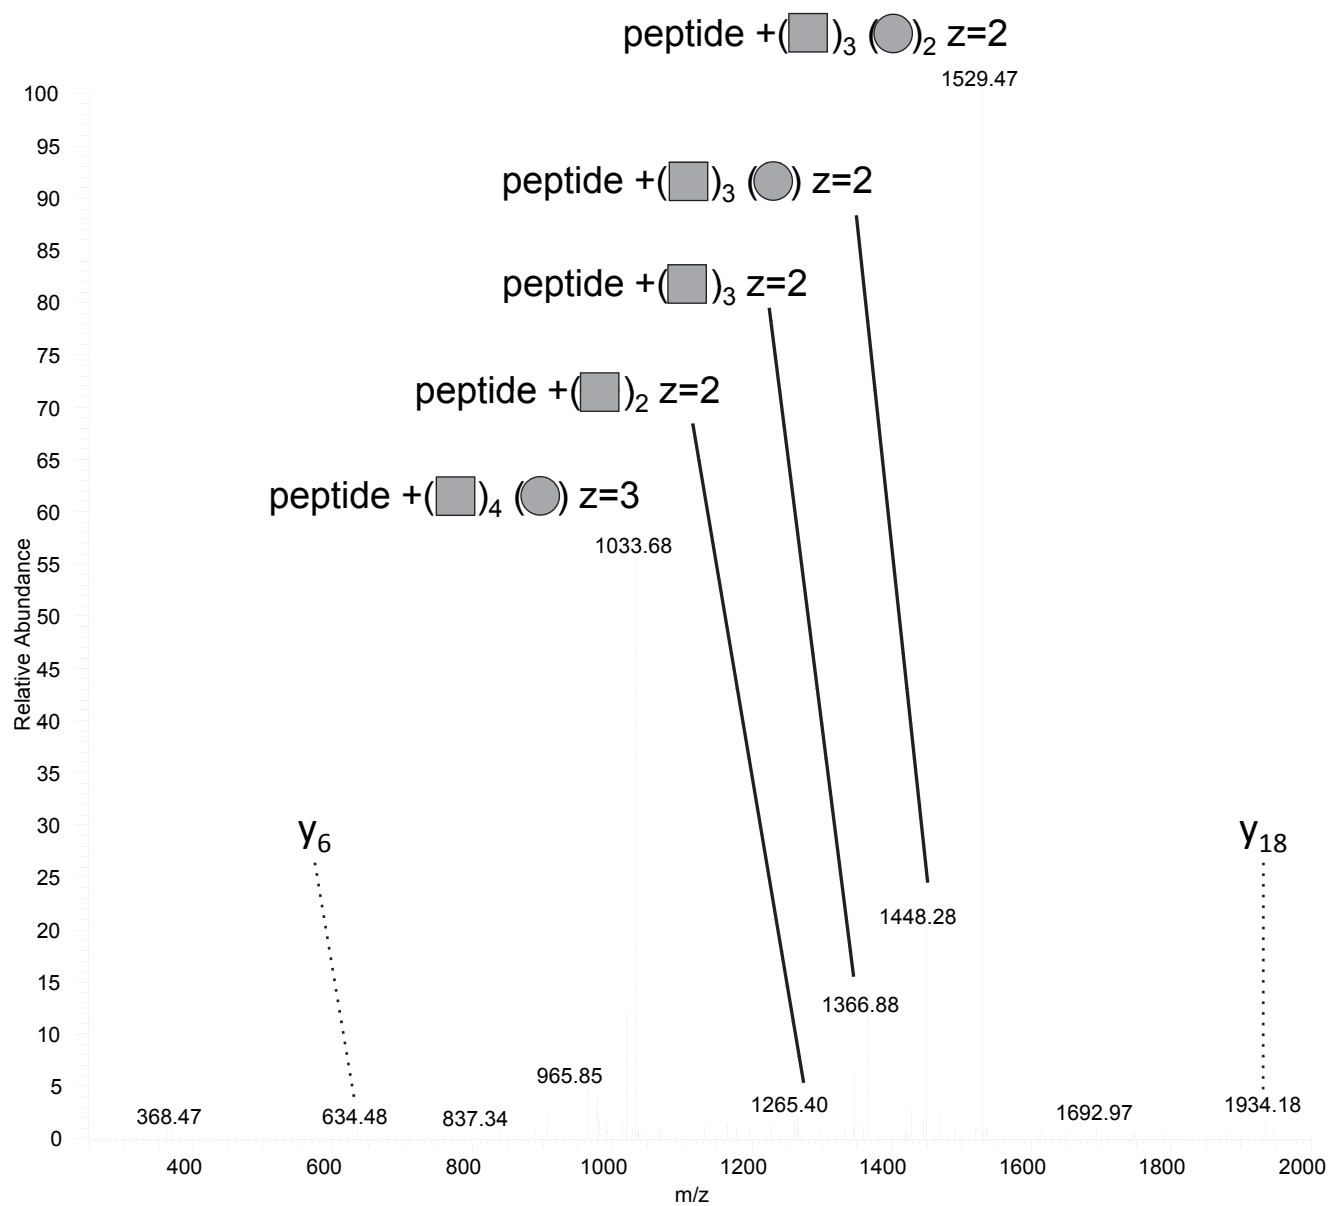

Supplemental Figure 3g

STSISEVSNILETQASLTDK +(HexNAc)<sub>4</sub> (Hex)<sub>3</sub>  
m/z= 1141.85 z=3, scan 1877 RT 23.30

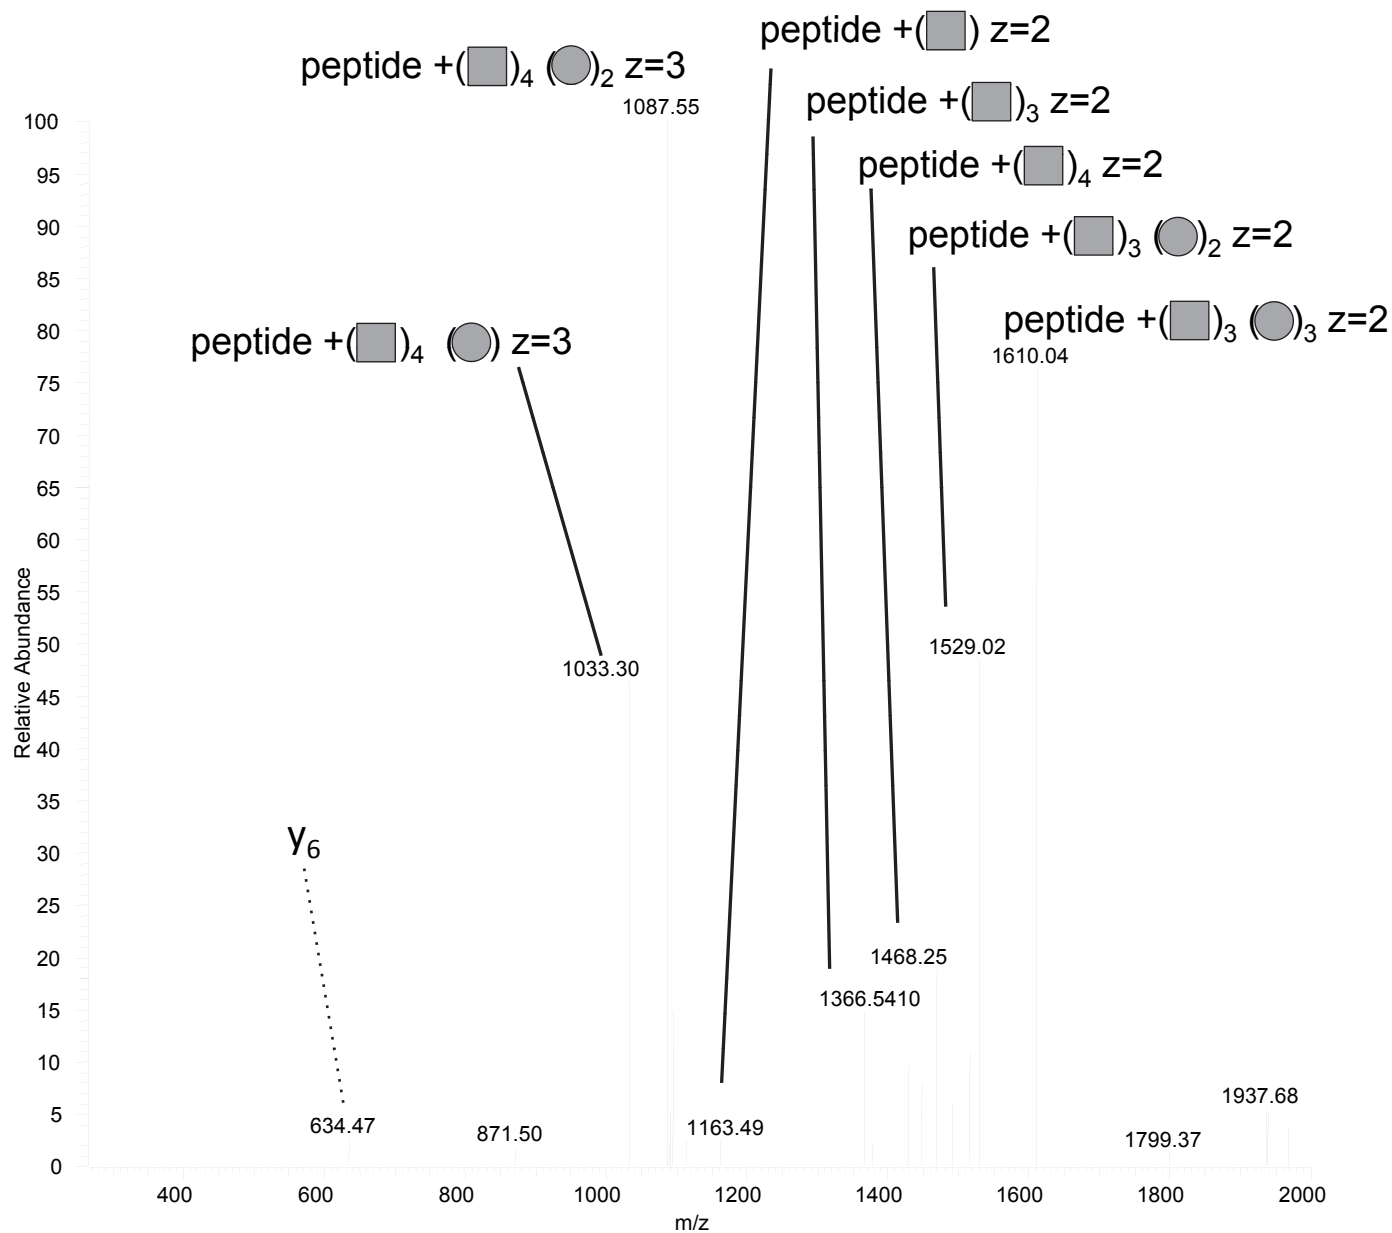

Supplemental Figure 3h

**STSISEVSNILETQASLTDK +(AcHexNAc)**  
**m/z= 790.39 z=3, scan 2345 RT 26.89**

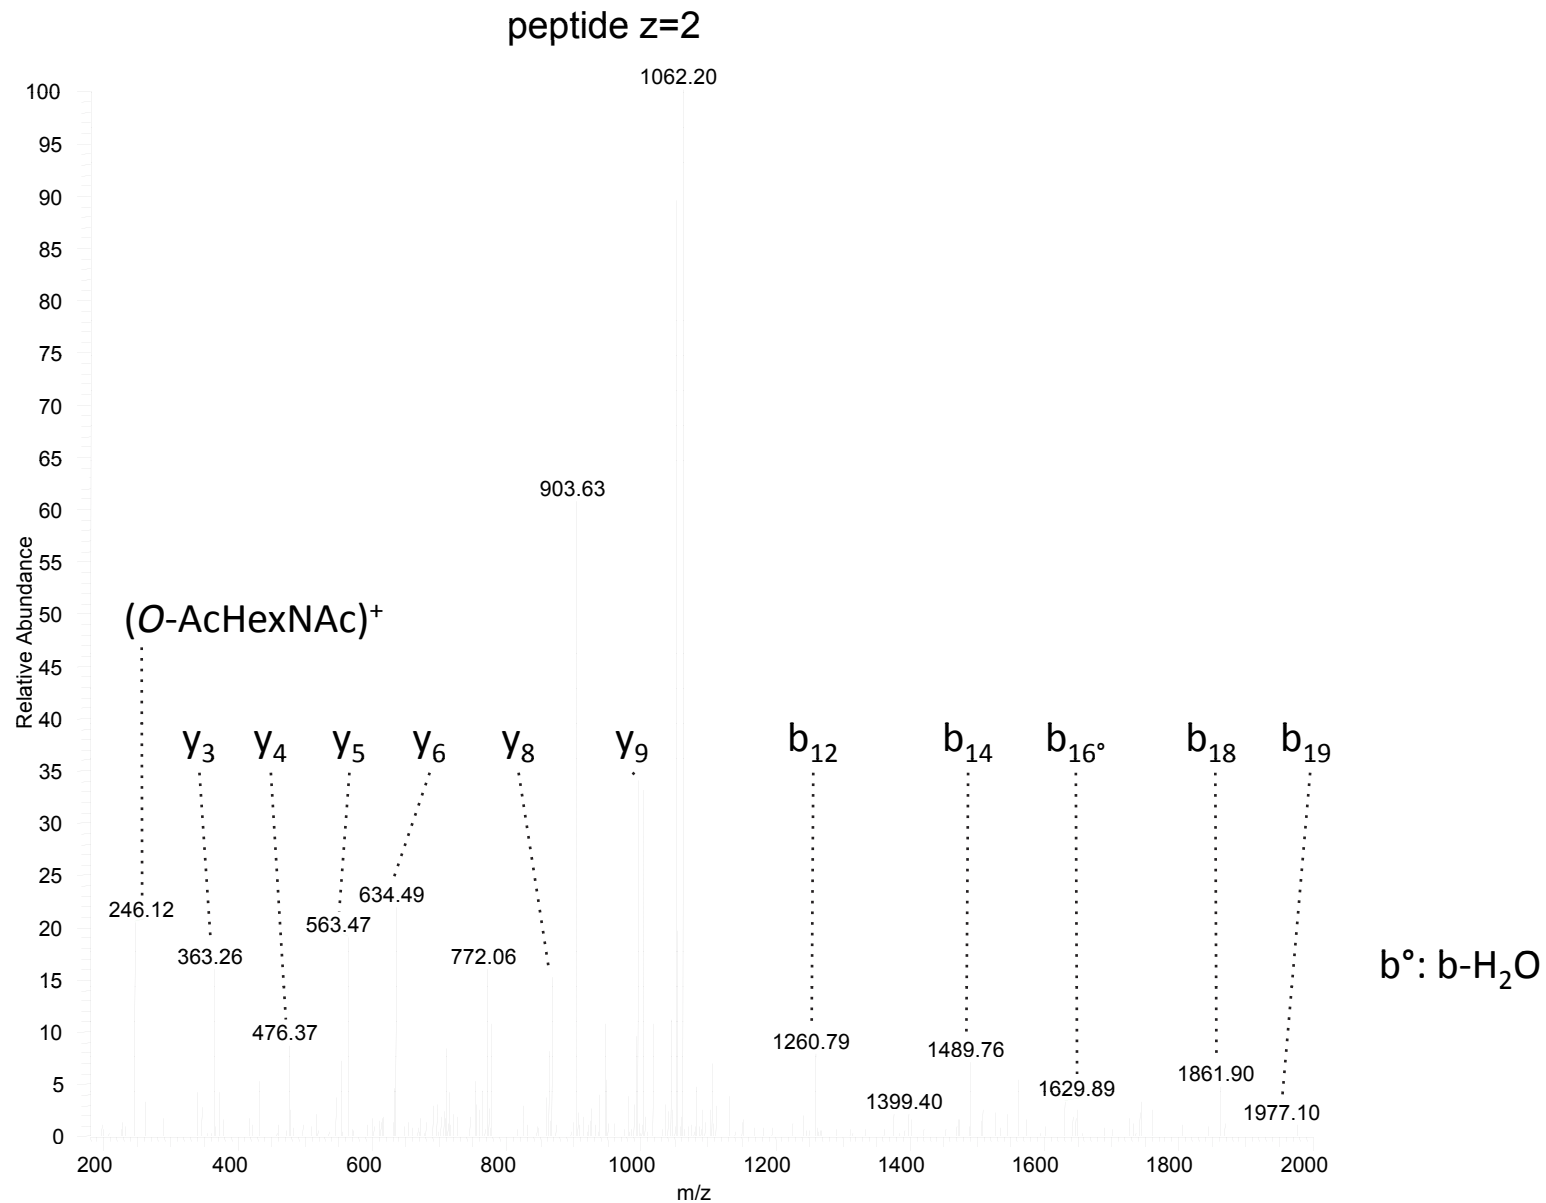

Supplemental Figure 3i

**STSISEVSNILETQASLTDK +(AcHexNAc) +(HexNAc)**  
**m/z= 857.75 z=3, scan 2338 RT 26.84**

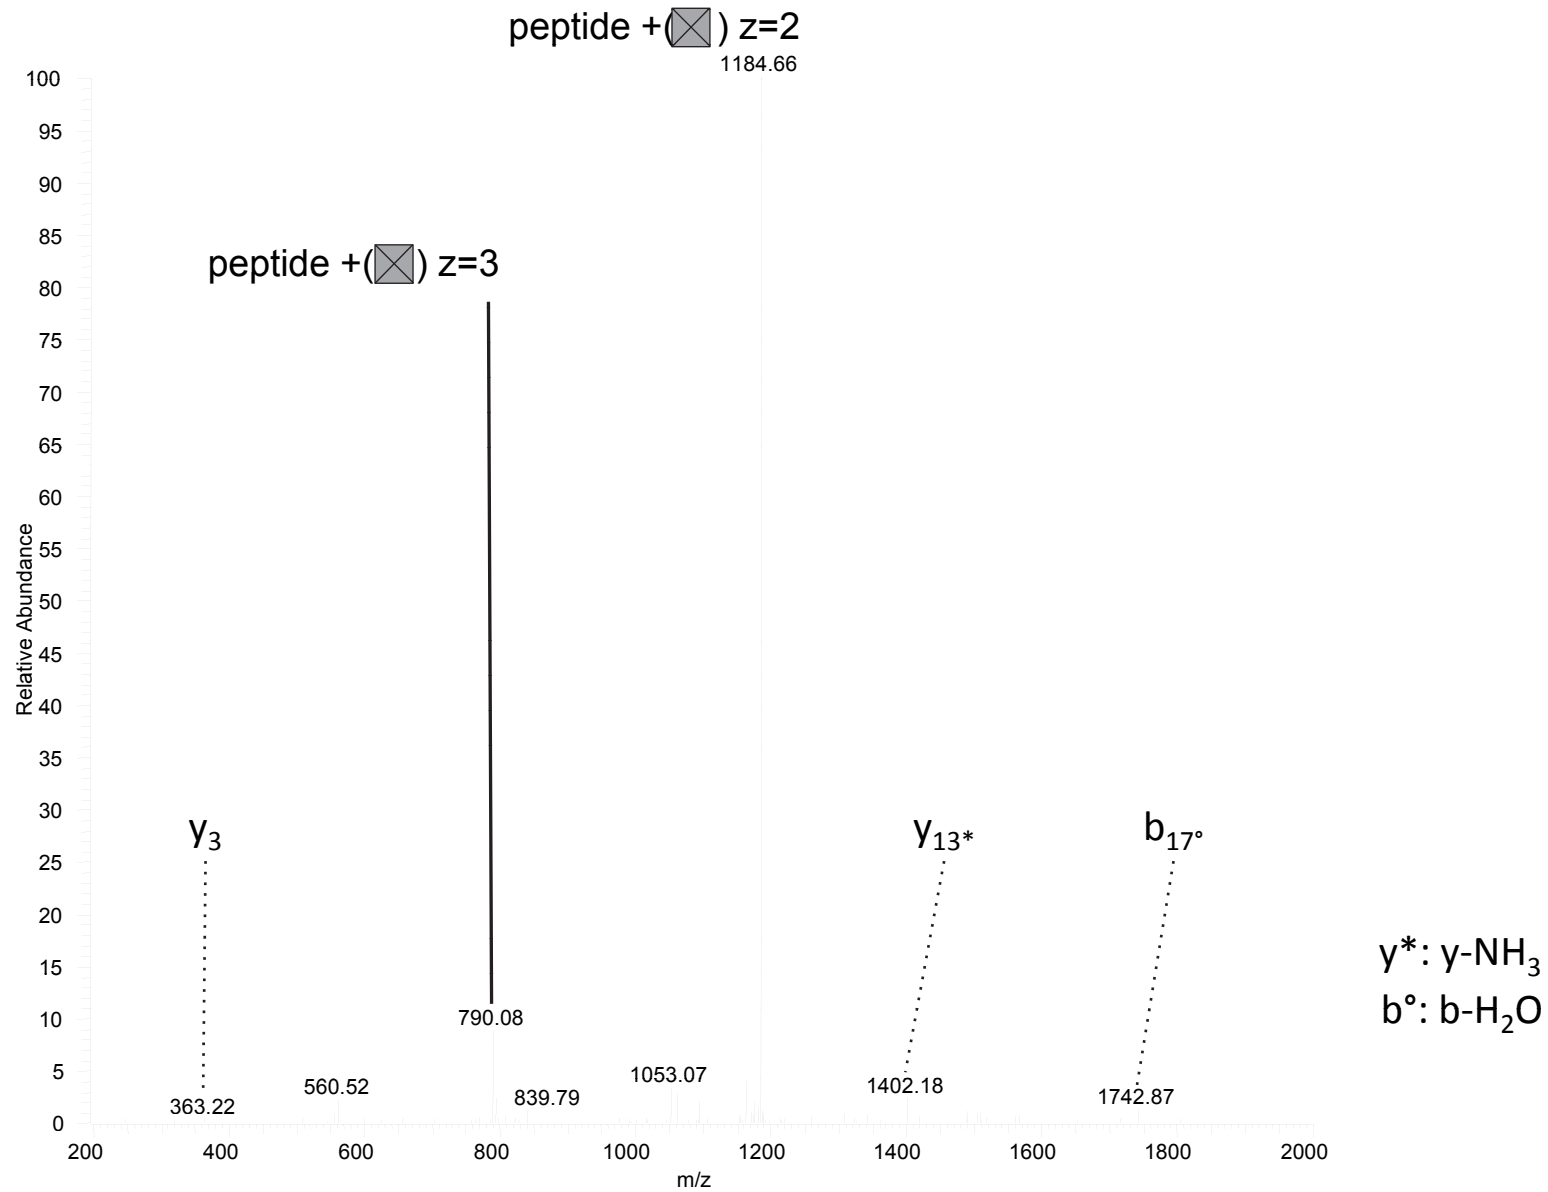

Supplemental Figure 3j

**STSISEVSNILETQASLTDK +(AcHexNAc) +(HexNAc)<sub>2</sub>**  
**m/z= 926.44 z=3, scan 2330 RT 26.77**

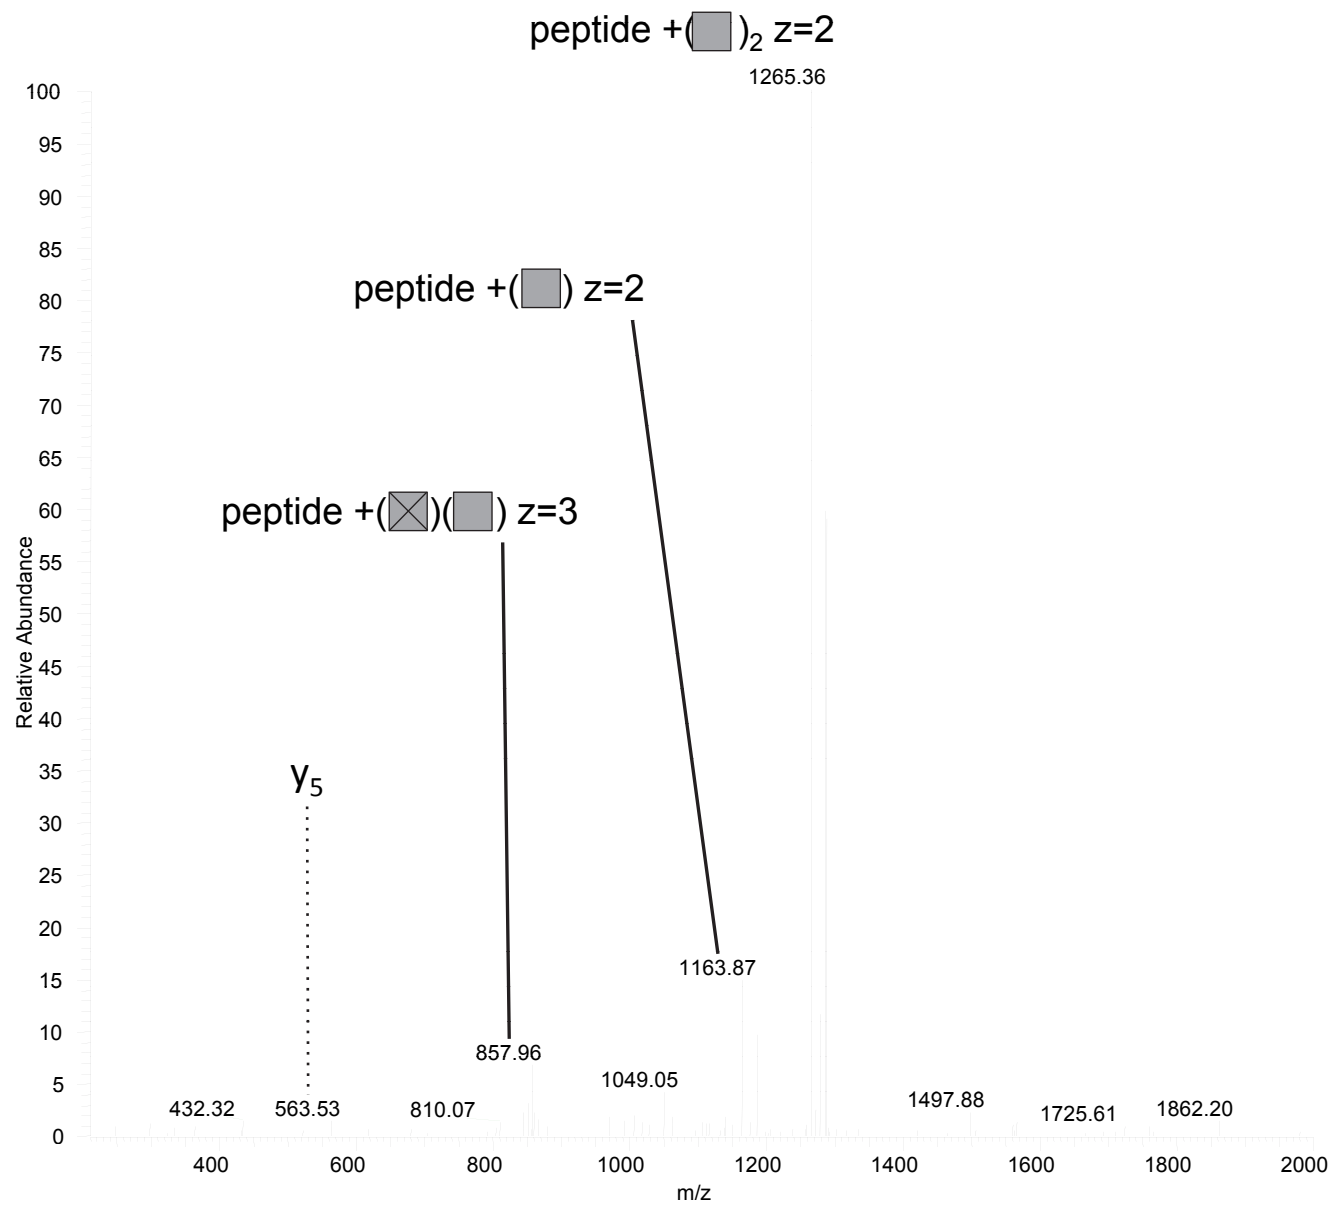

Supplemental Figure 3k

STSISEVSNILETQASLTDK +(AcHexNAc) +(HexNAc)<sub>3</sub>  
m/z= 993.80 z=3, scan 2048 RT 24.62

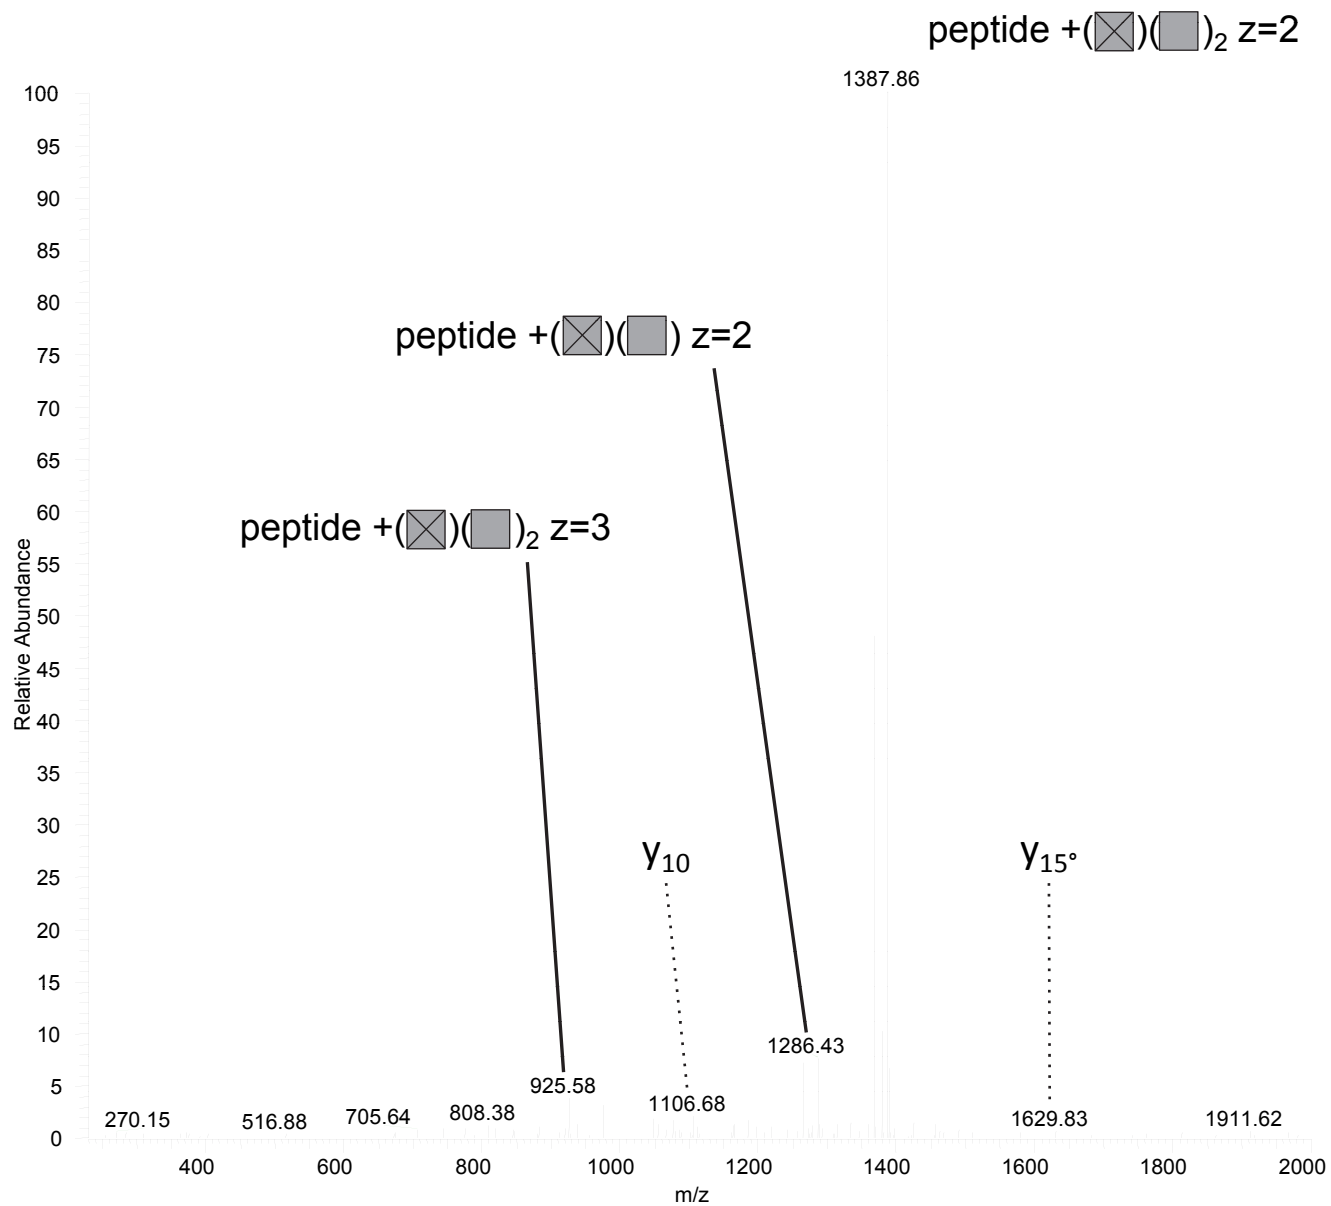

Supplemental Figure 3I

ESFSANQIVTESSLVTDAGK nude  
m/z= 1042.51 z=2, scan 2178 RT 25.60

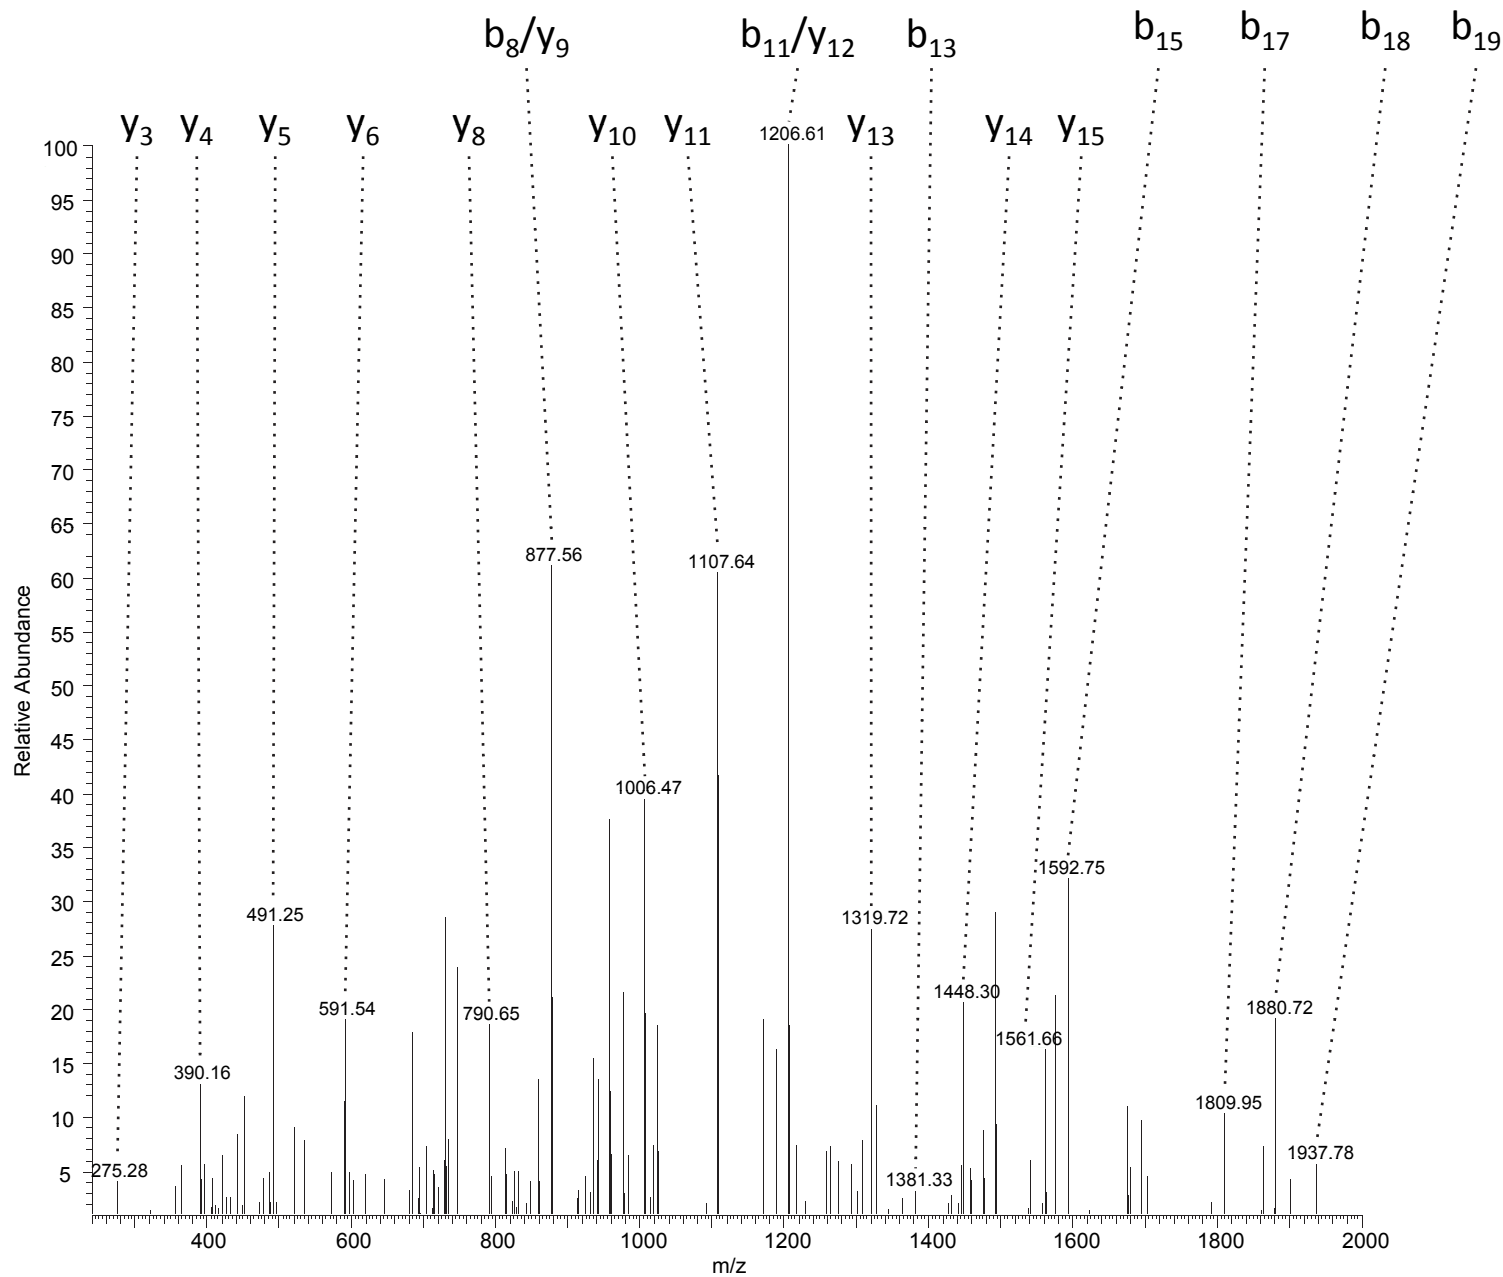



Supplemental Figure 3m

ESFSANQIVTESSLVTDAGK +(HexNAc)  
m/z= 1143.55 z=2, scan 2113 RT 25.12

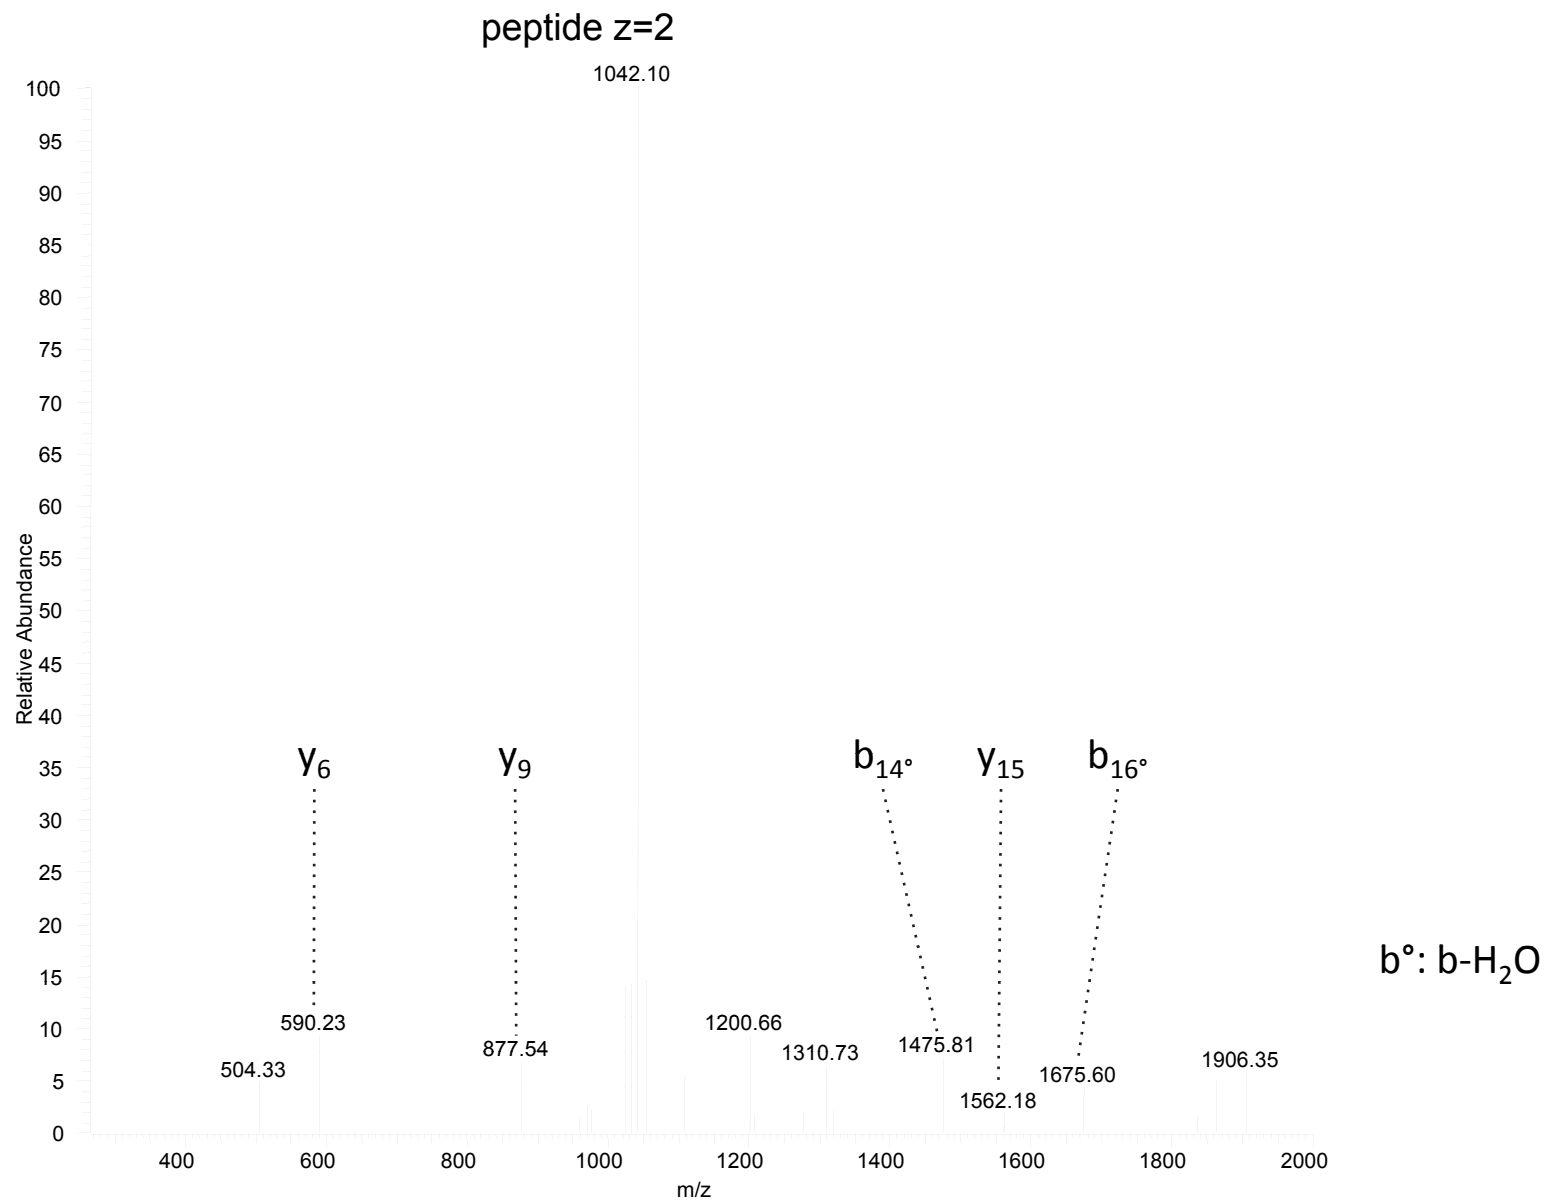

Supplemental Figure 3n

ESFSANQIVTESSLVTDAGK +(AcHexNAc)  
m/z=1165.05 z=2, scan 2197 RT 25.75

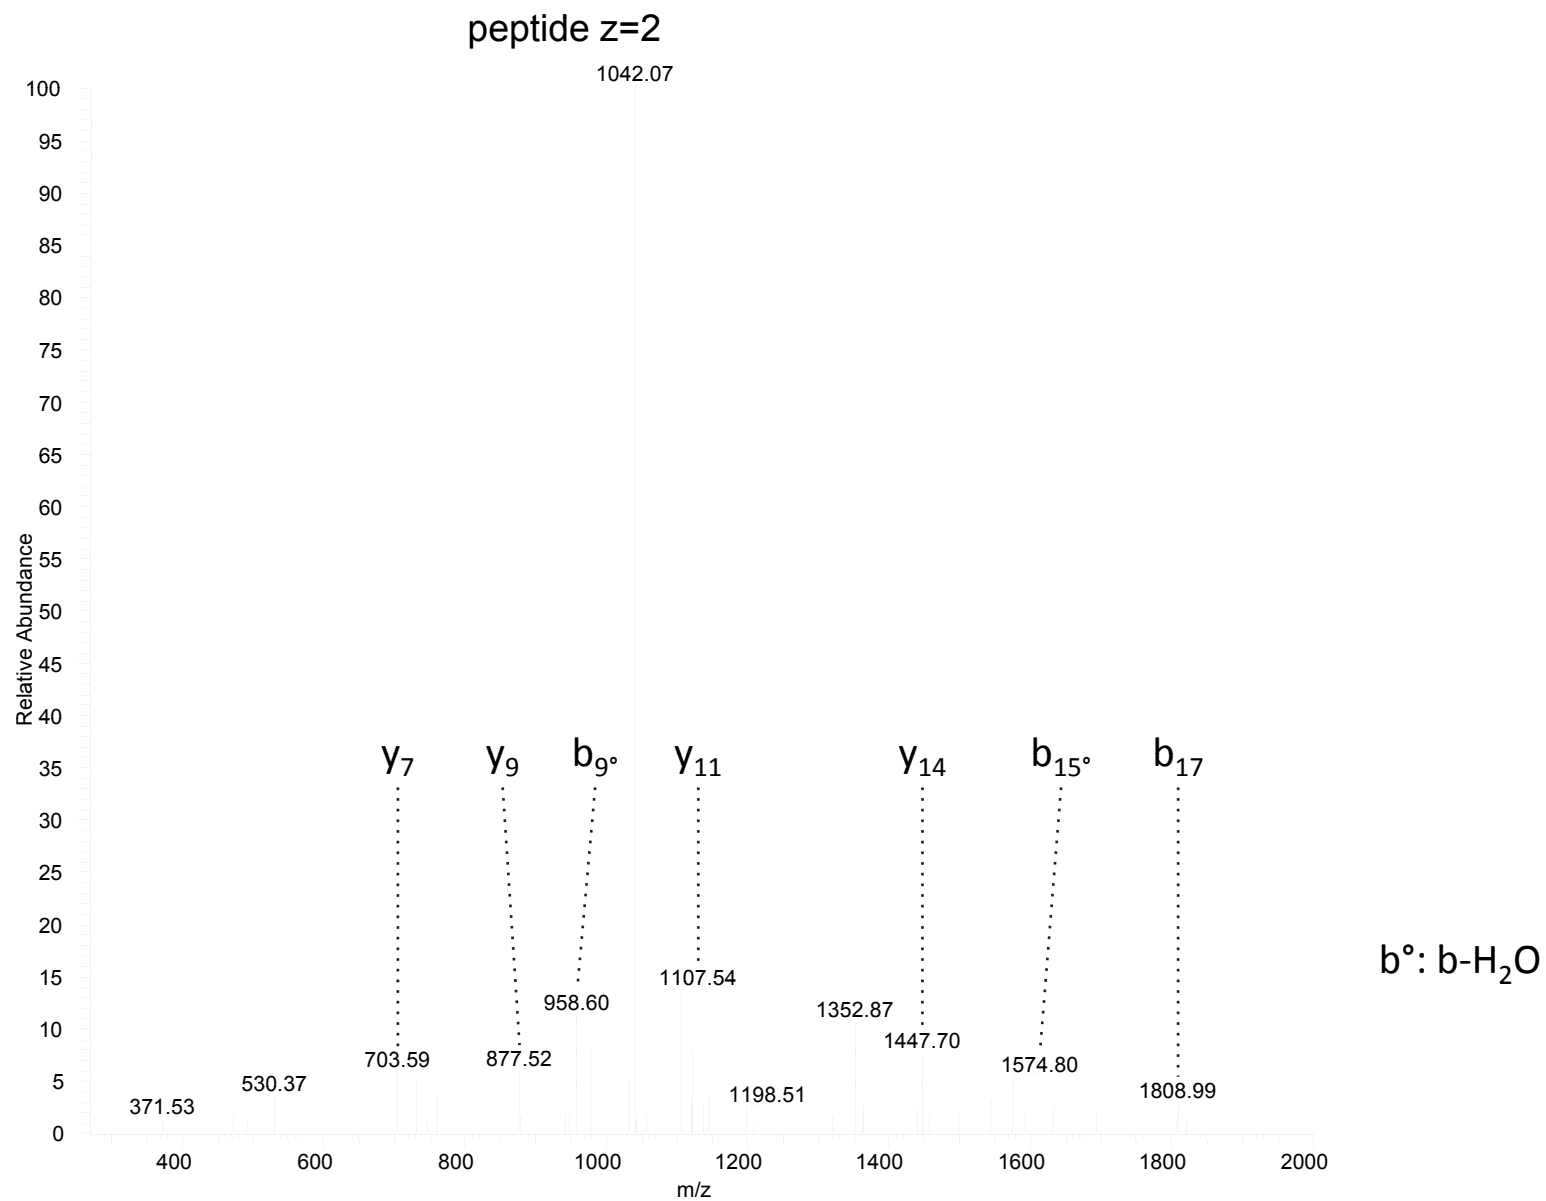

Supplemental Figure 3o

NASVSSLIEITKPK nude  
m/z= 743.93 z=2, scan 1601 RT 21.04

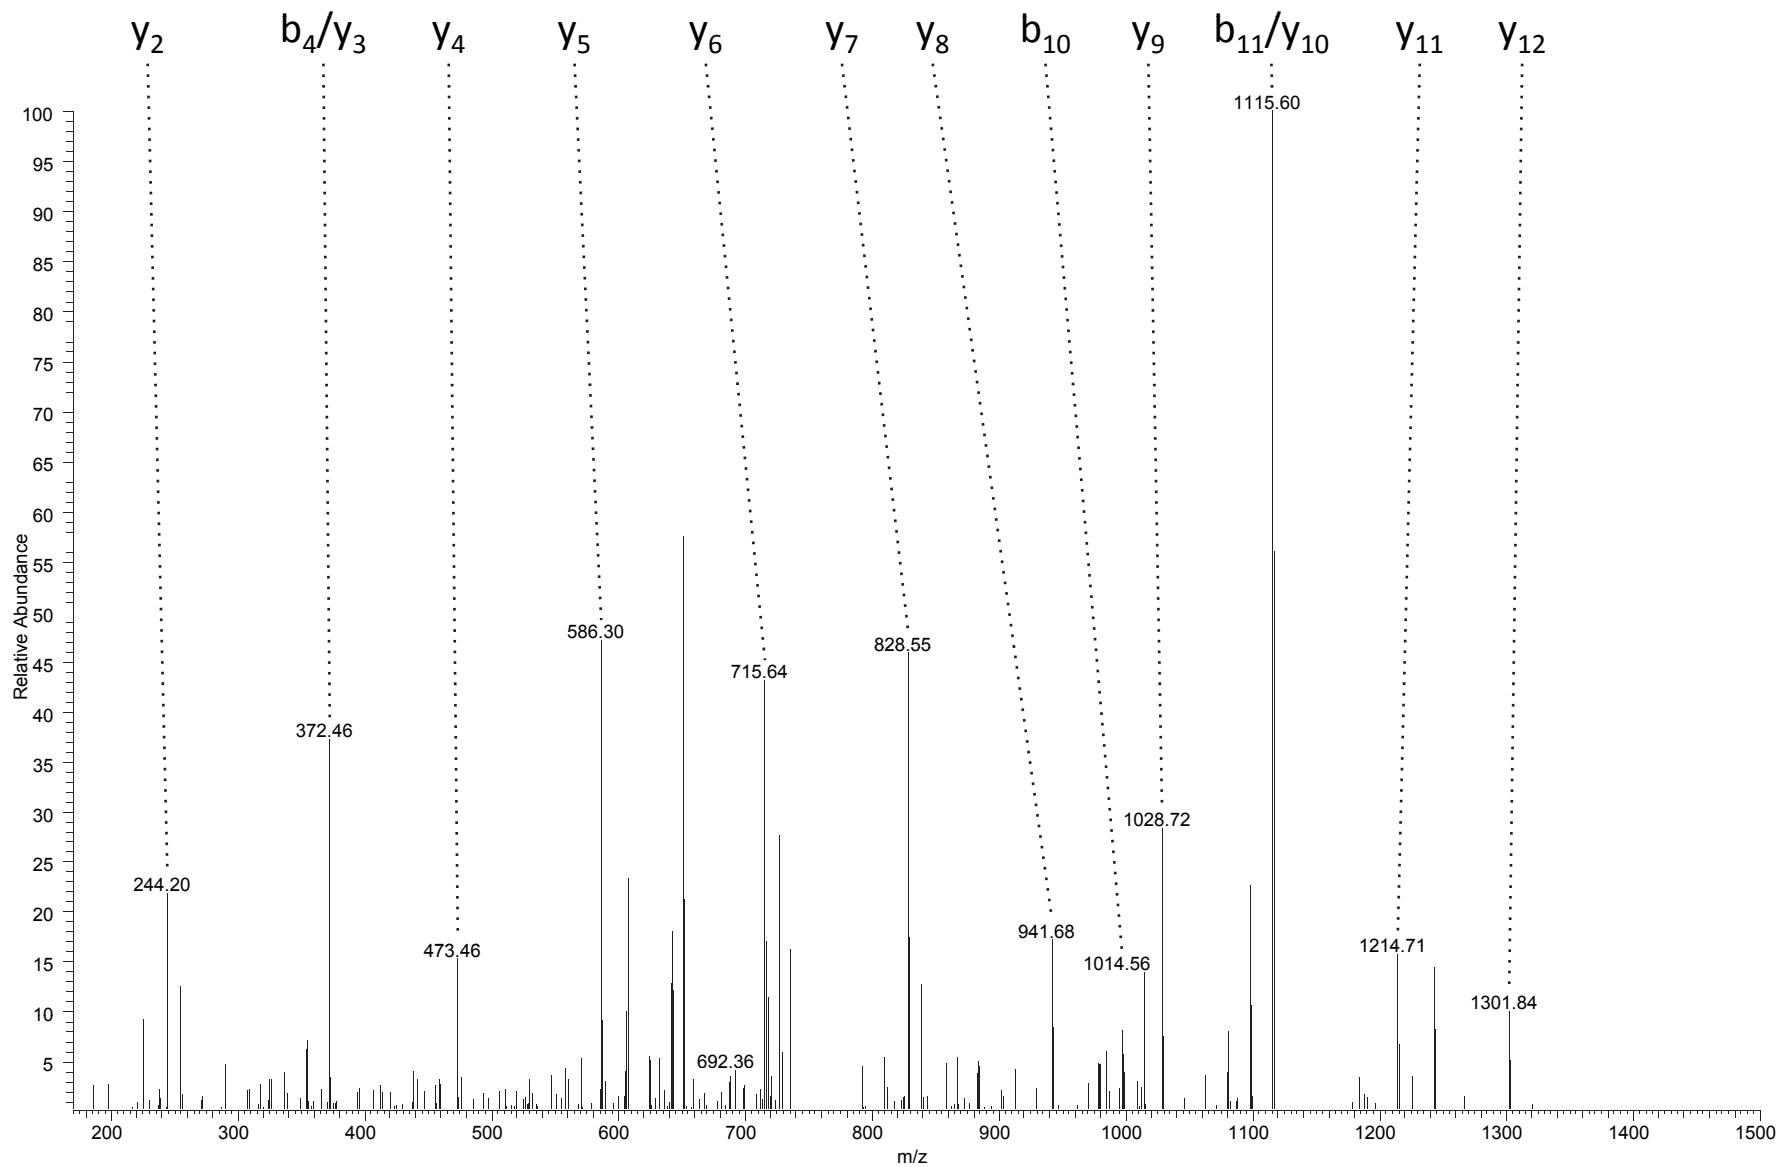

Supplemental Figure 3p

**NASVSSLIEITKPK +(HexNAc)**  
**m/z= 845.46 z=2, scan 1498 RT 20.21**

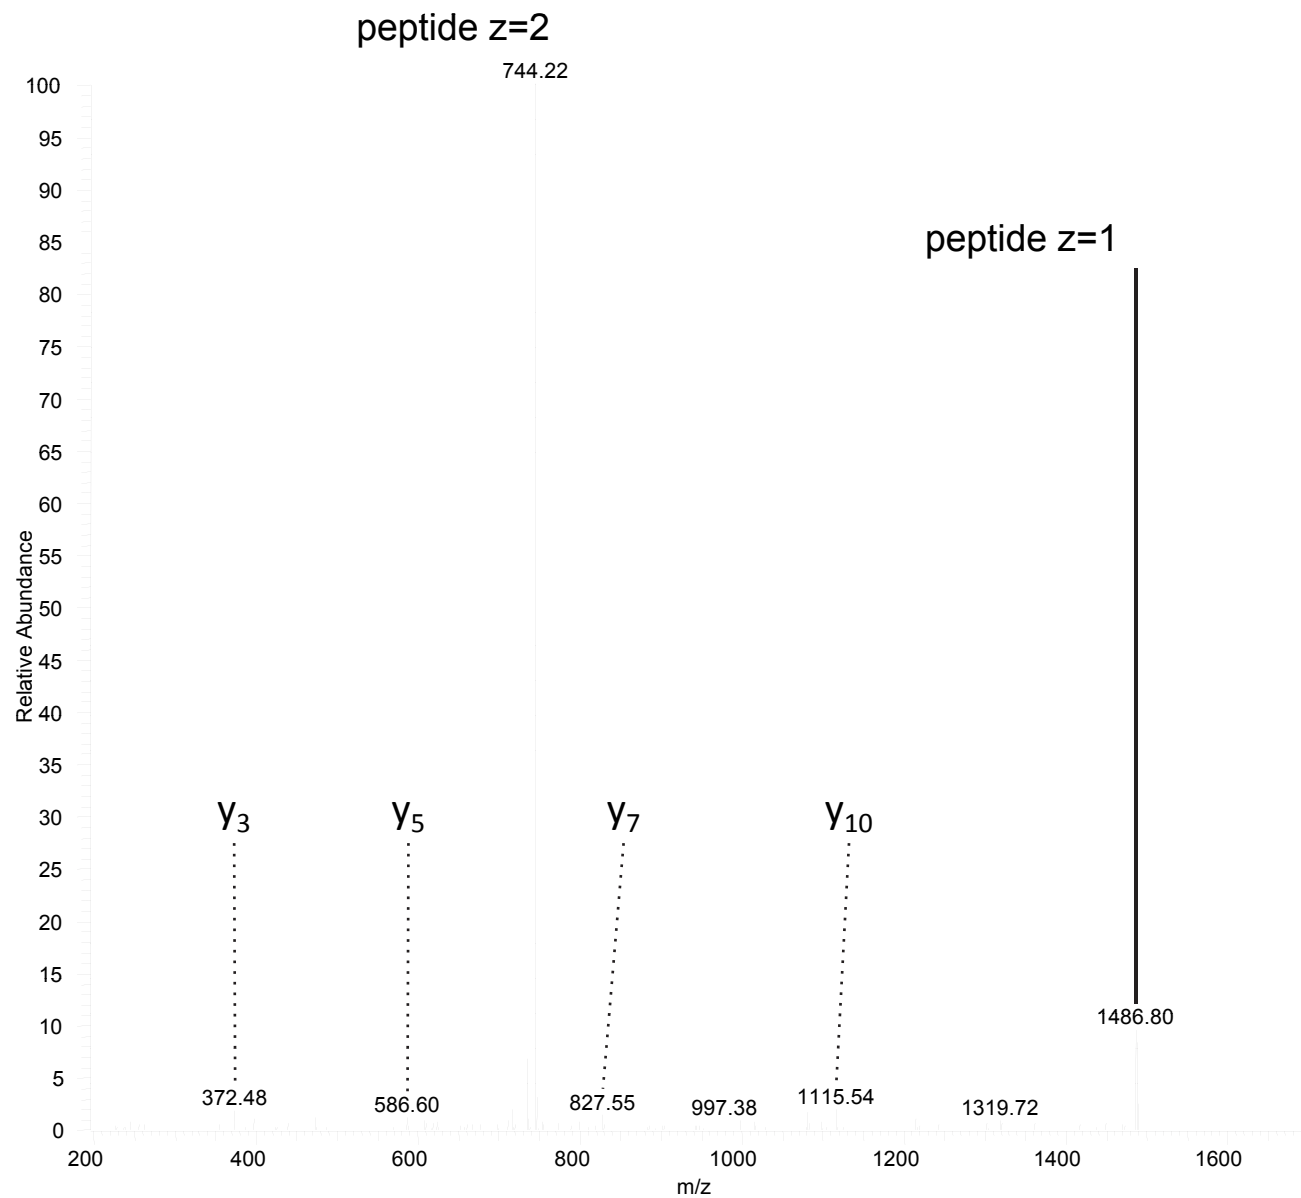

Supplemental Figure 3q

NASVSSLIEITKPK +(HexNAc)<sub>2</sub>  
m/z 631.67 z=3, scan 1340 RT 18.91

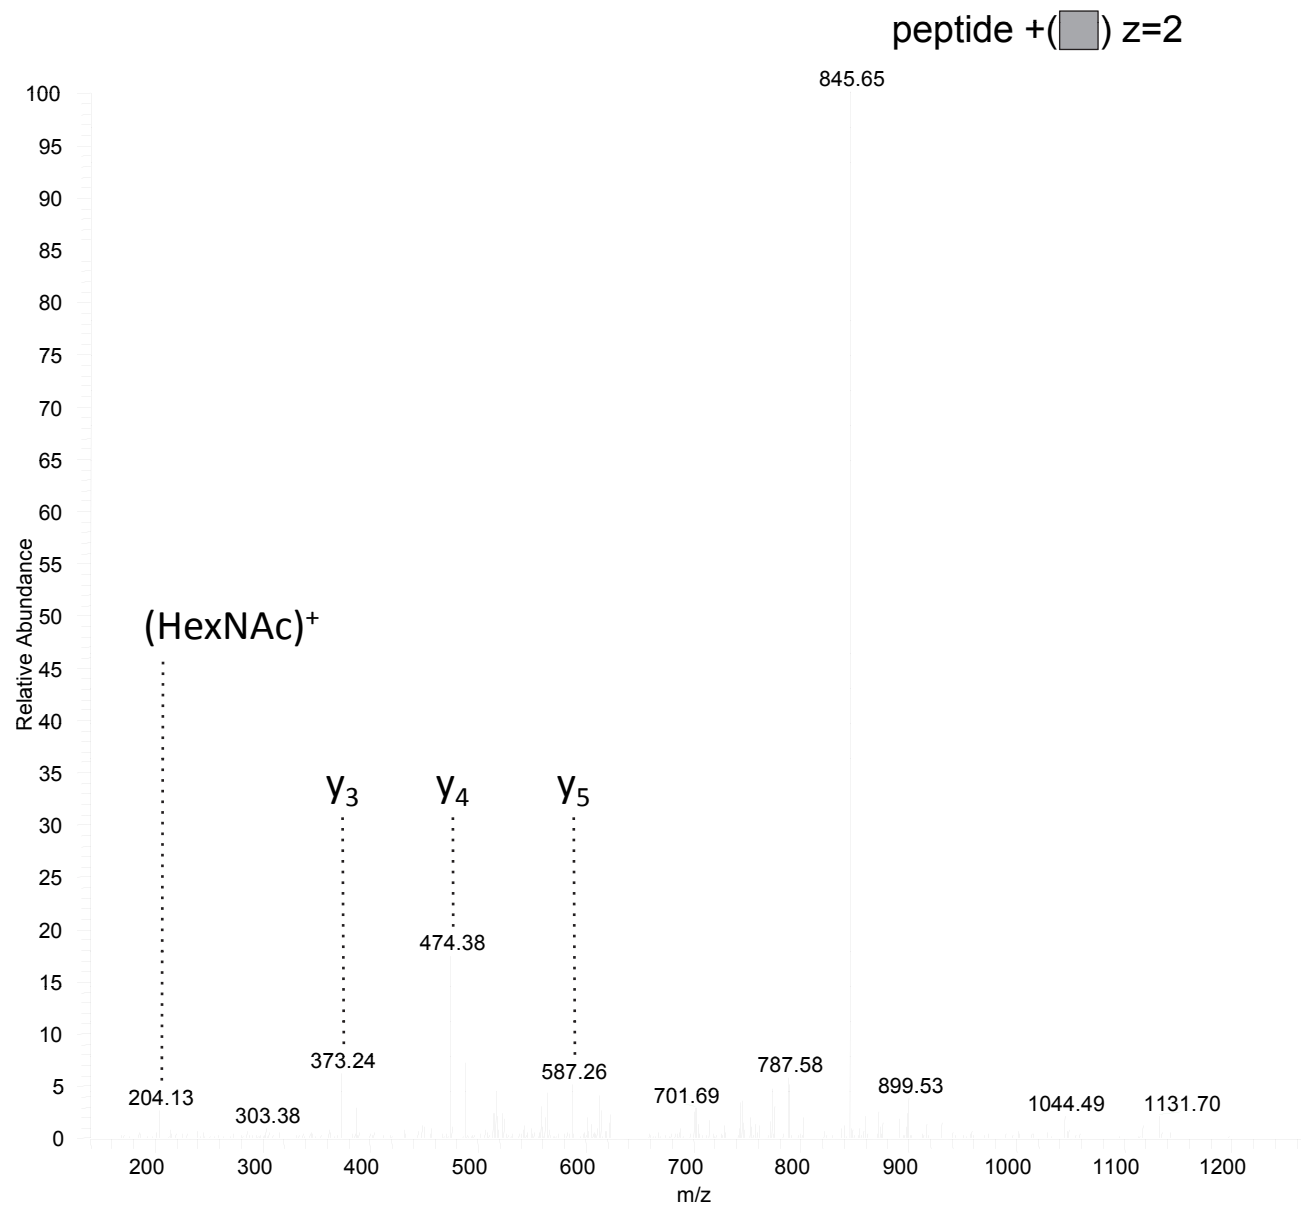

Supplemental Figure 3r

TGNESLTPTIR +(HexNAc) z=2  
m/z= 696.85 z=2, scan 1045 RT 16.51

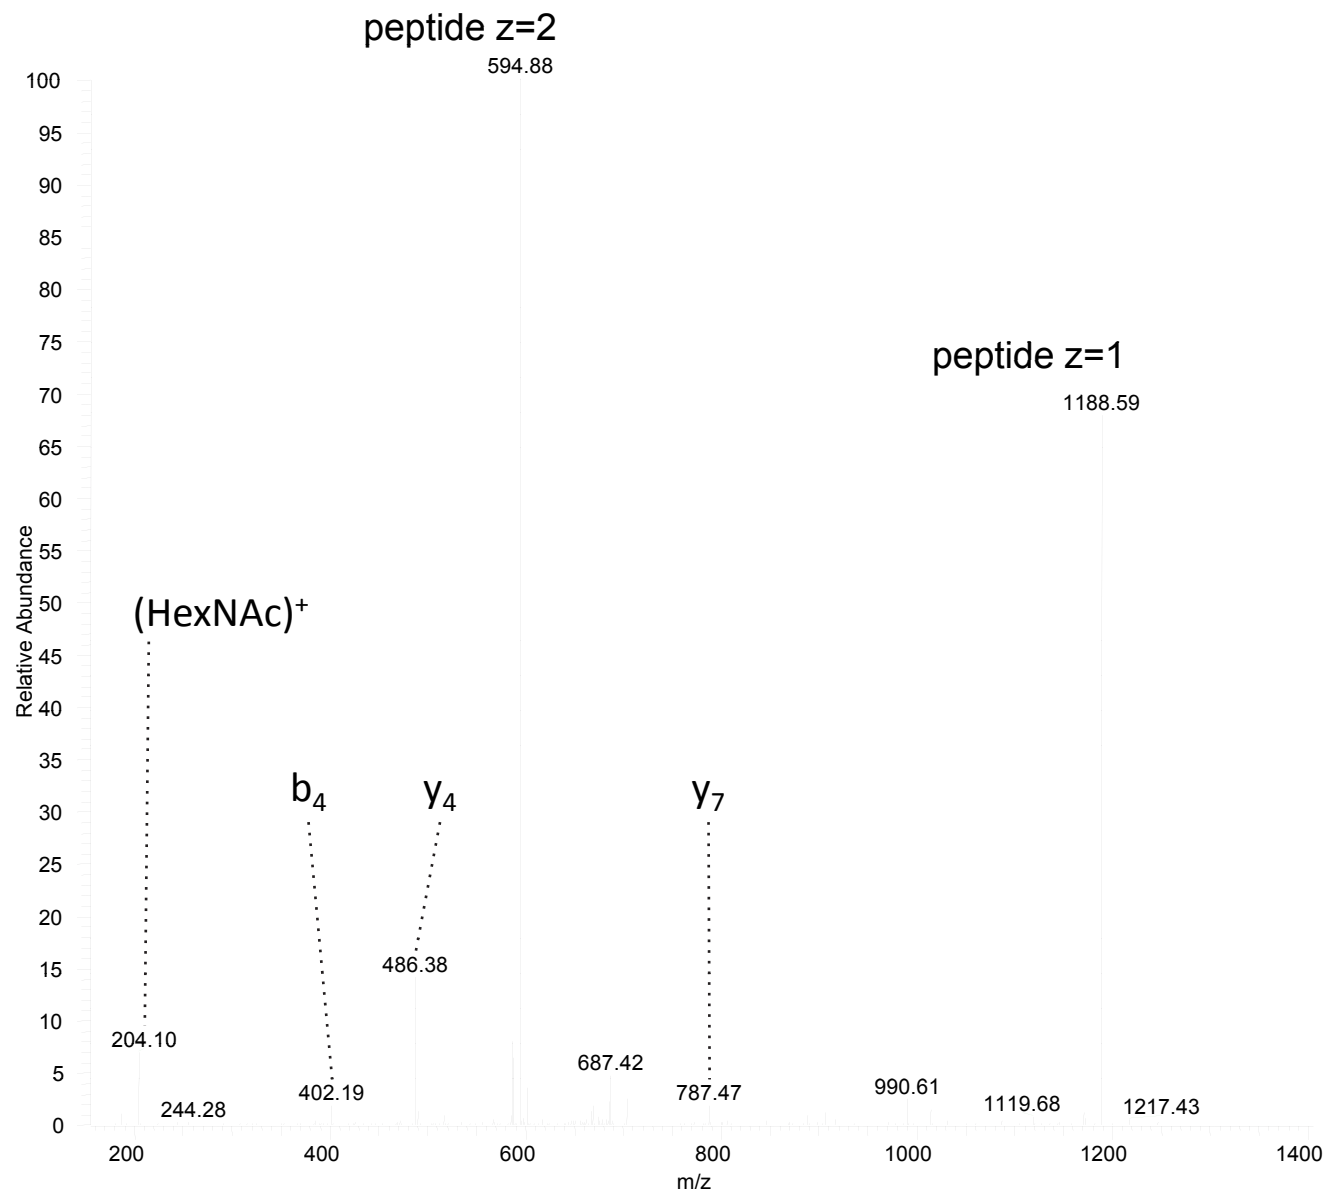

Supplemental Figure 3s

SQVMIASDKTGNESLTPTIR nude  
m/z= 722.04 z=3, scan 1348 RT 19.75

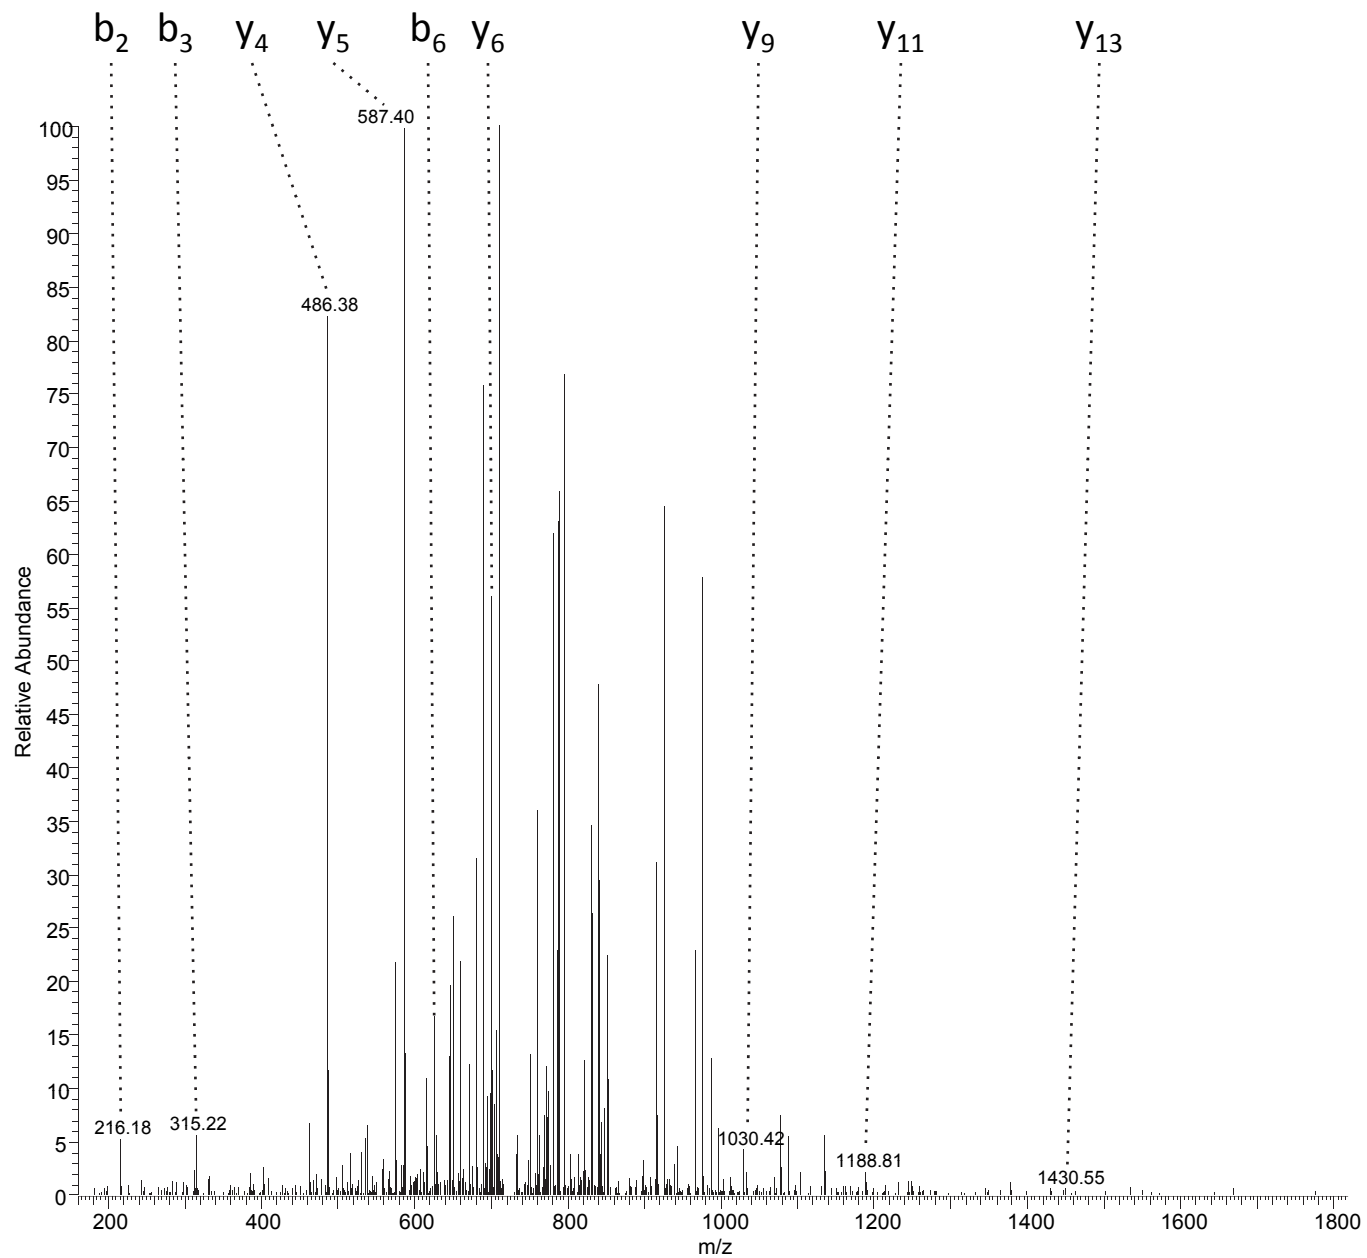

Supplemental Figure 3t

**SQVMIASDKTGNESLTPTIR +(HexNAc)**  
**m/z= 789.73 z=3, scan 1316 RT 19.47**

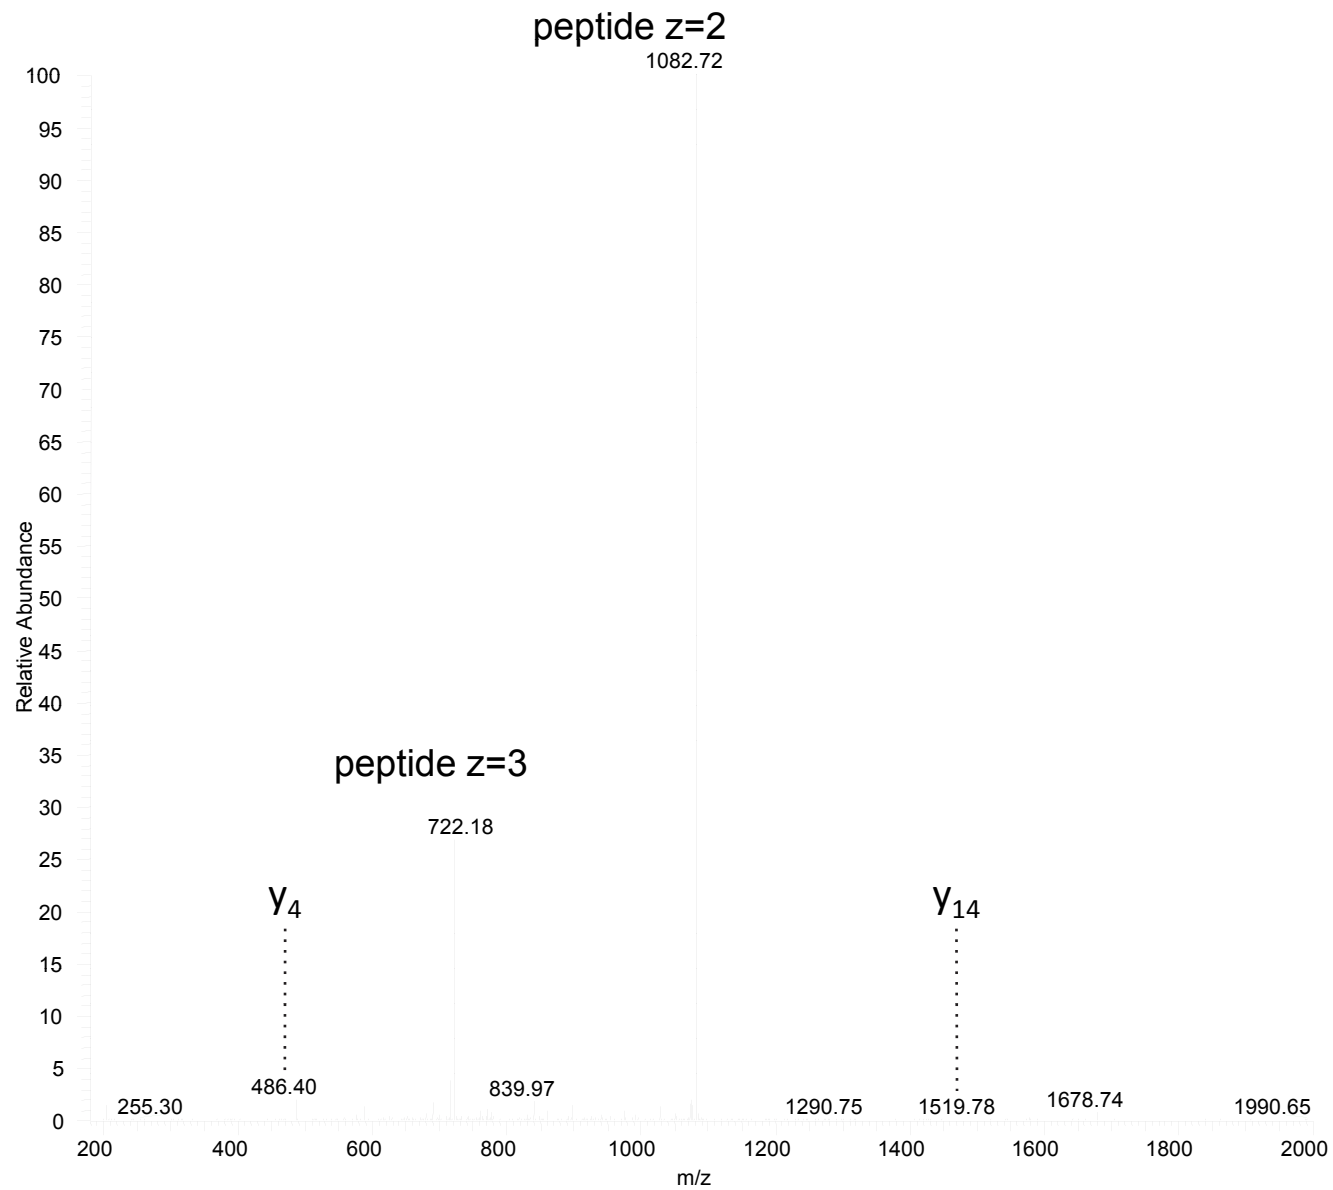



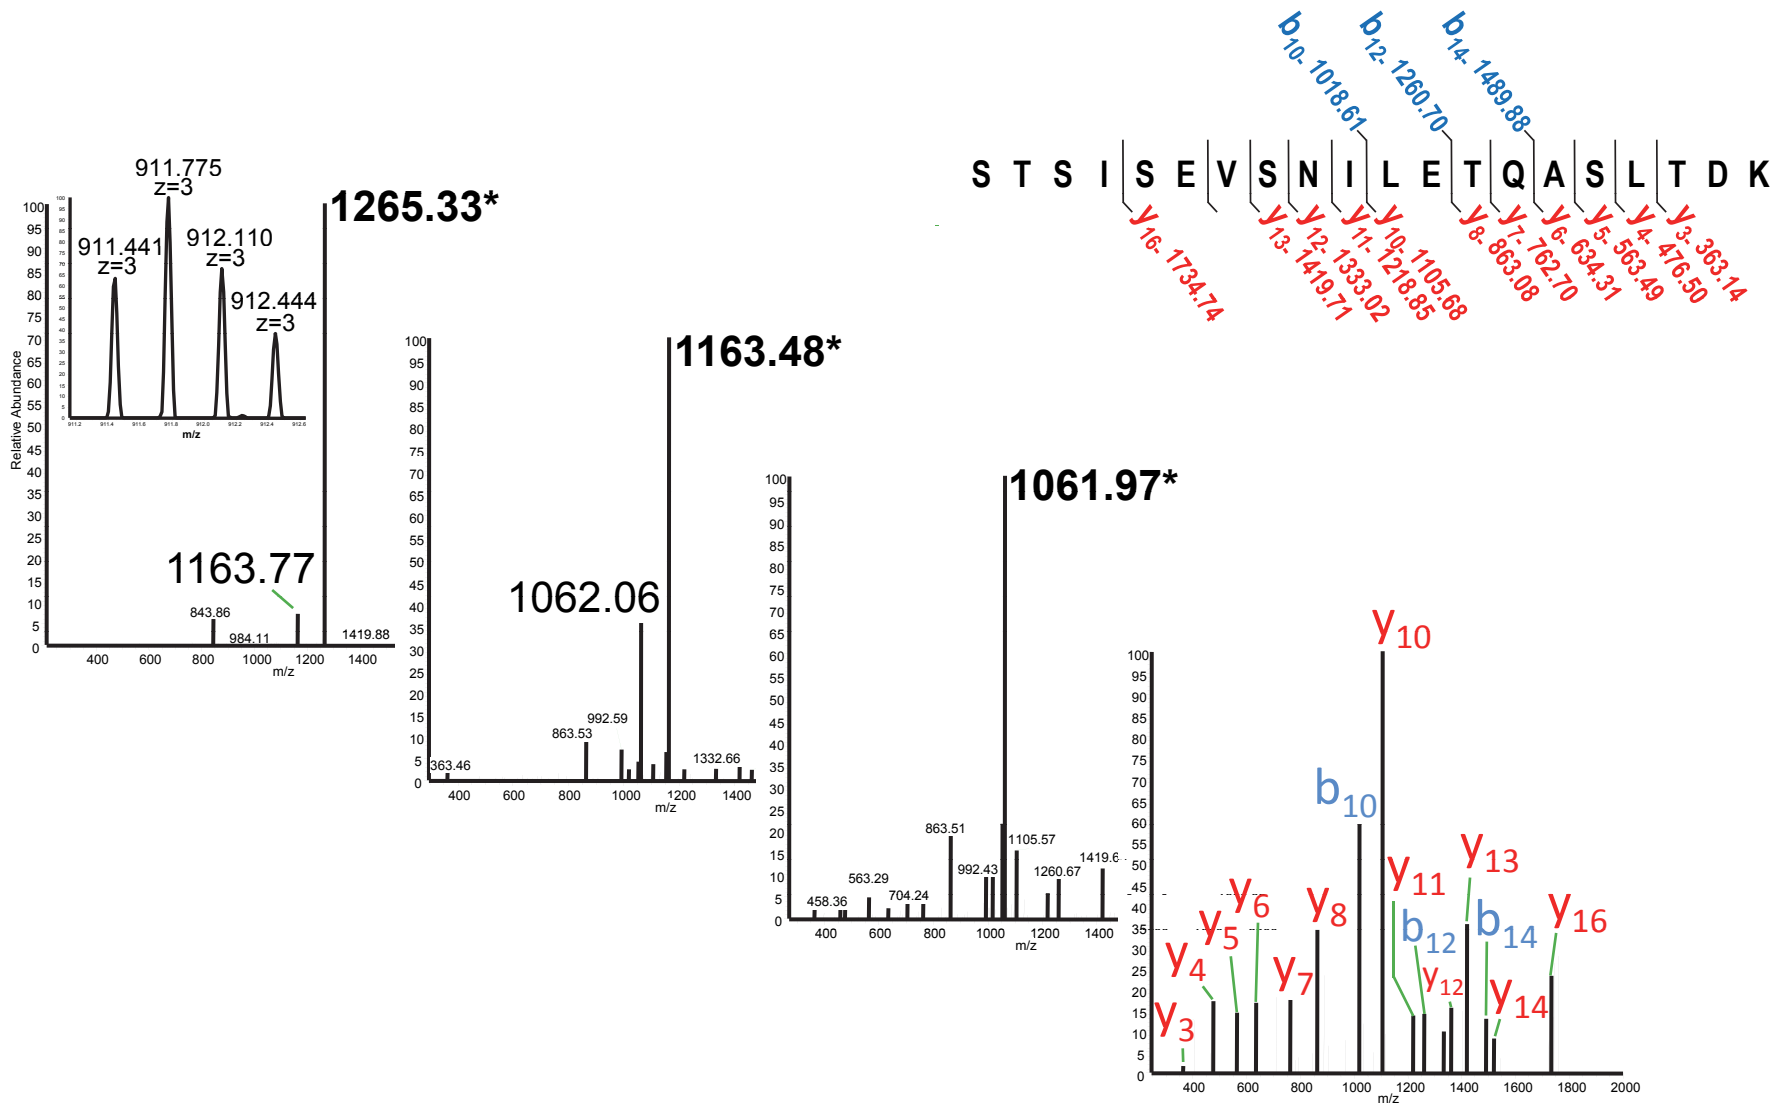

Supplemental Figure 4

## Supplemental Figure 5a

S<sub>192</sub>TSISEVSNILETQASLTDK<sub>211</sub>

SpectrumFinder Reference

m/z= 1062.04 (+2)

ech 96, scan 9577

SpectrumFinder score: 0.00E+00

Precision: 0.37 ppm

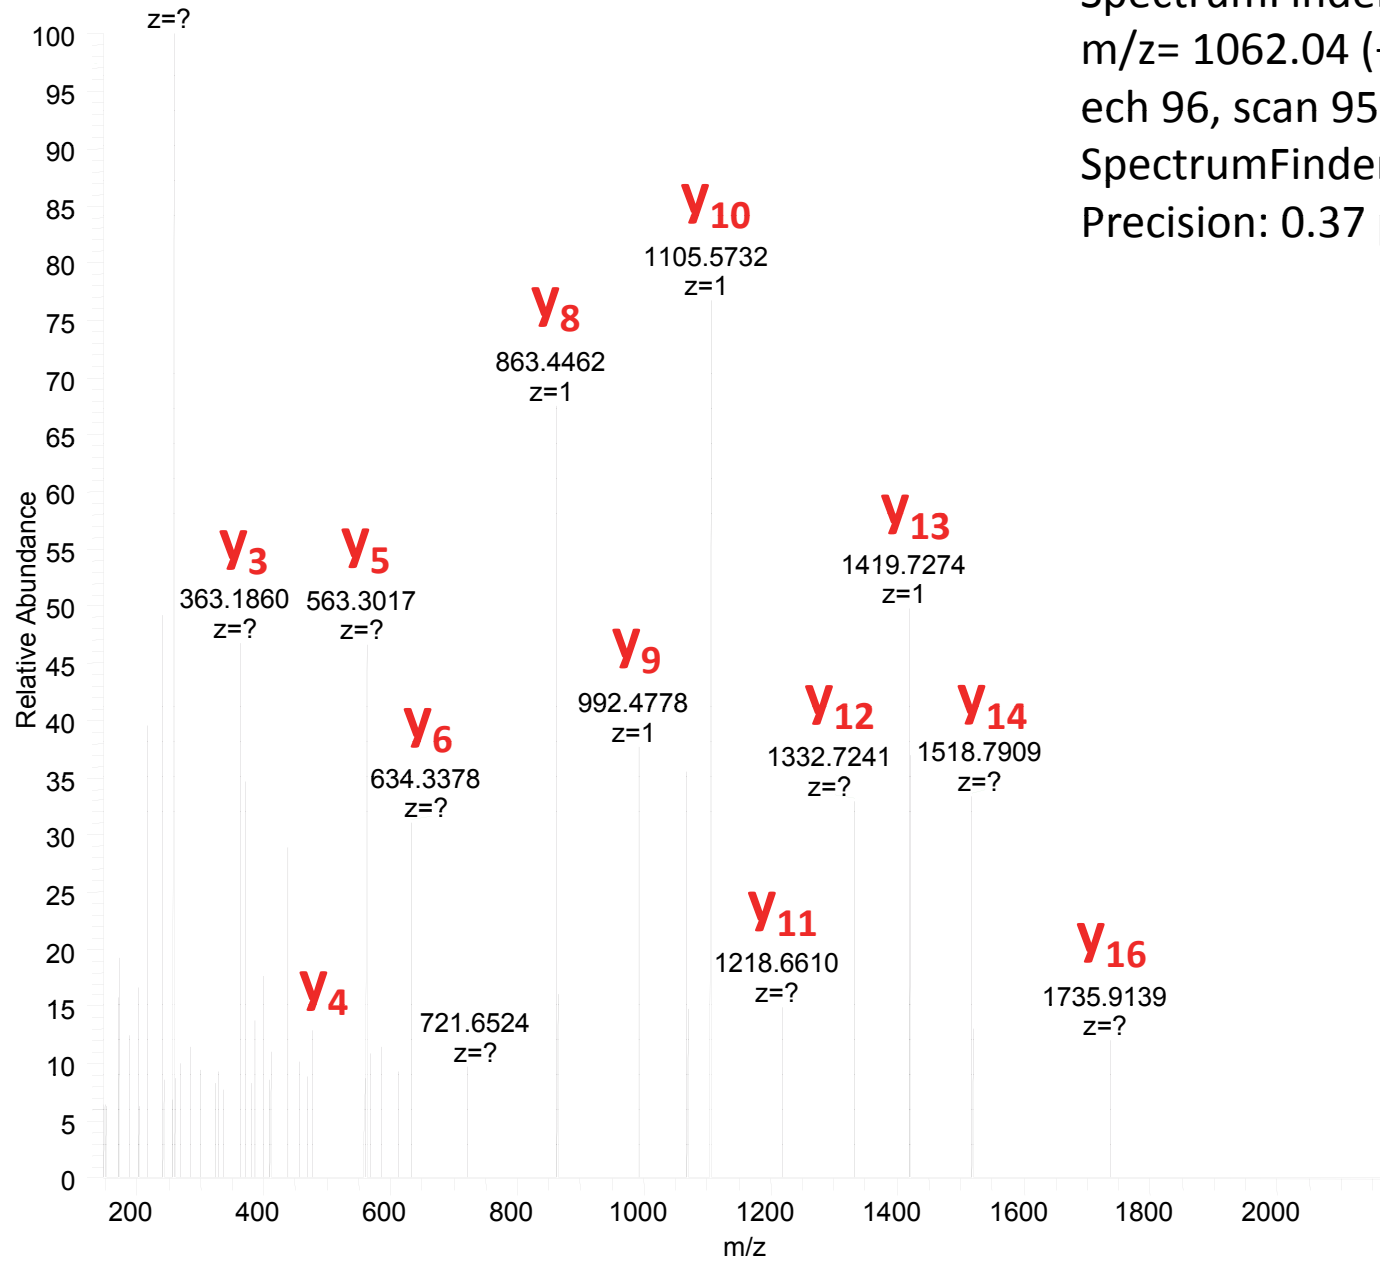

## Supplemental Figure 5b

S<sub>192</sub>TSISEVSNILETQASLTDK<sub>211</sub>

+ 2 HexNAc

m/z = 843.7487 (+3)

ech 96, scan 8871

SpectrumFinder score: 3.25E-09

Precision: 0.04 ppm

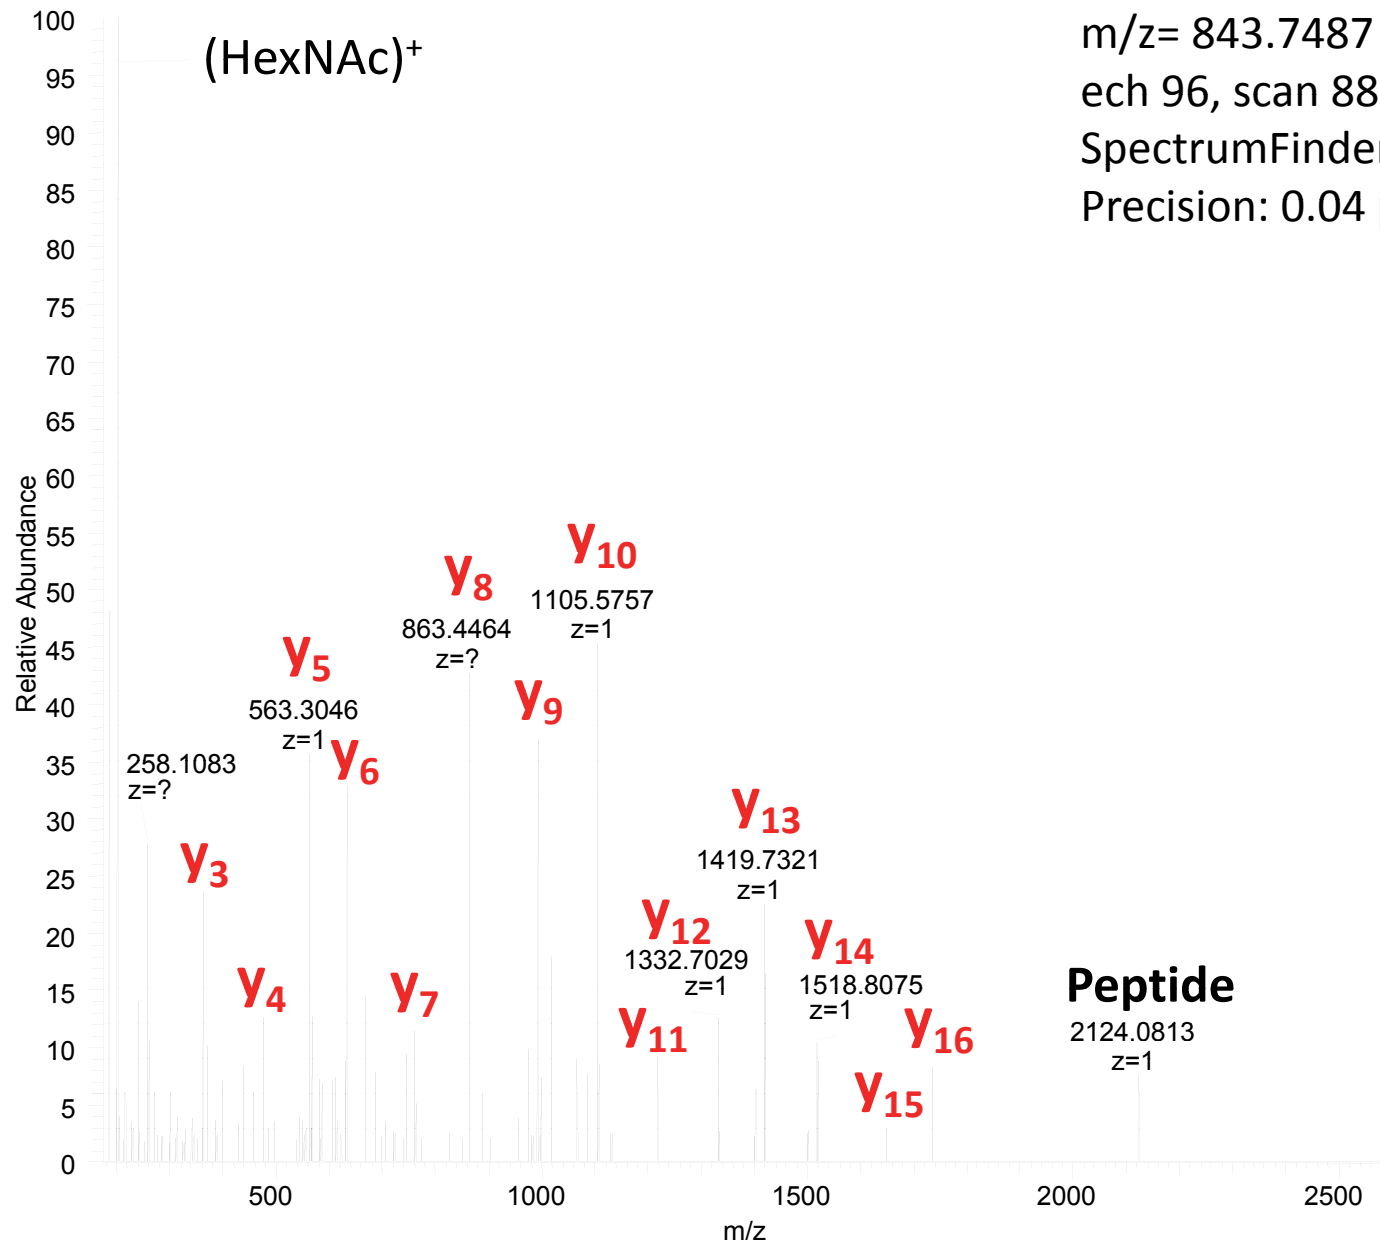

## Supplemental Figure 5c

S<sub>192</sub>TSISEVSNILETQASLTDK<sub>211</sub>

+ 3 HexNAc

m/z = 911.4419 (+3)

ech 96, scan 8853

SpectrumFinder score: 1.61E-04

Precision: 0.26 ppm

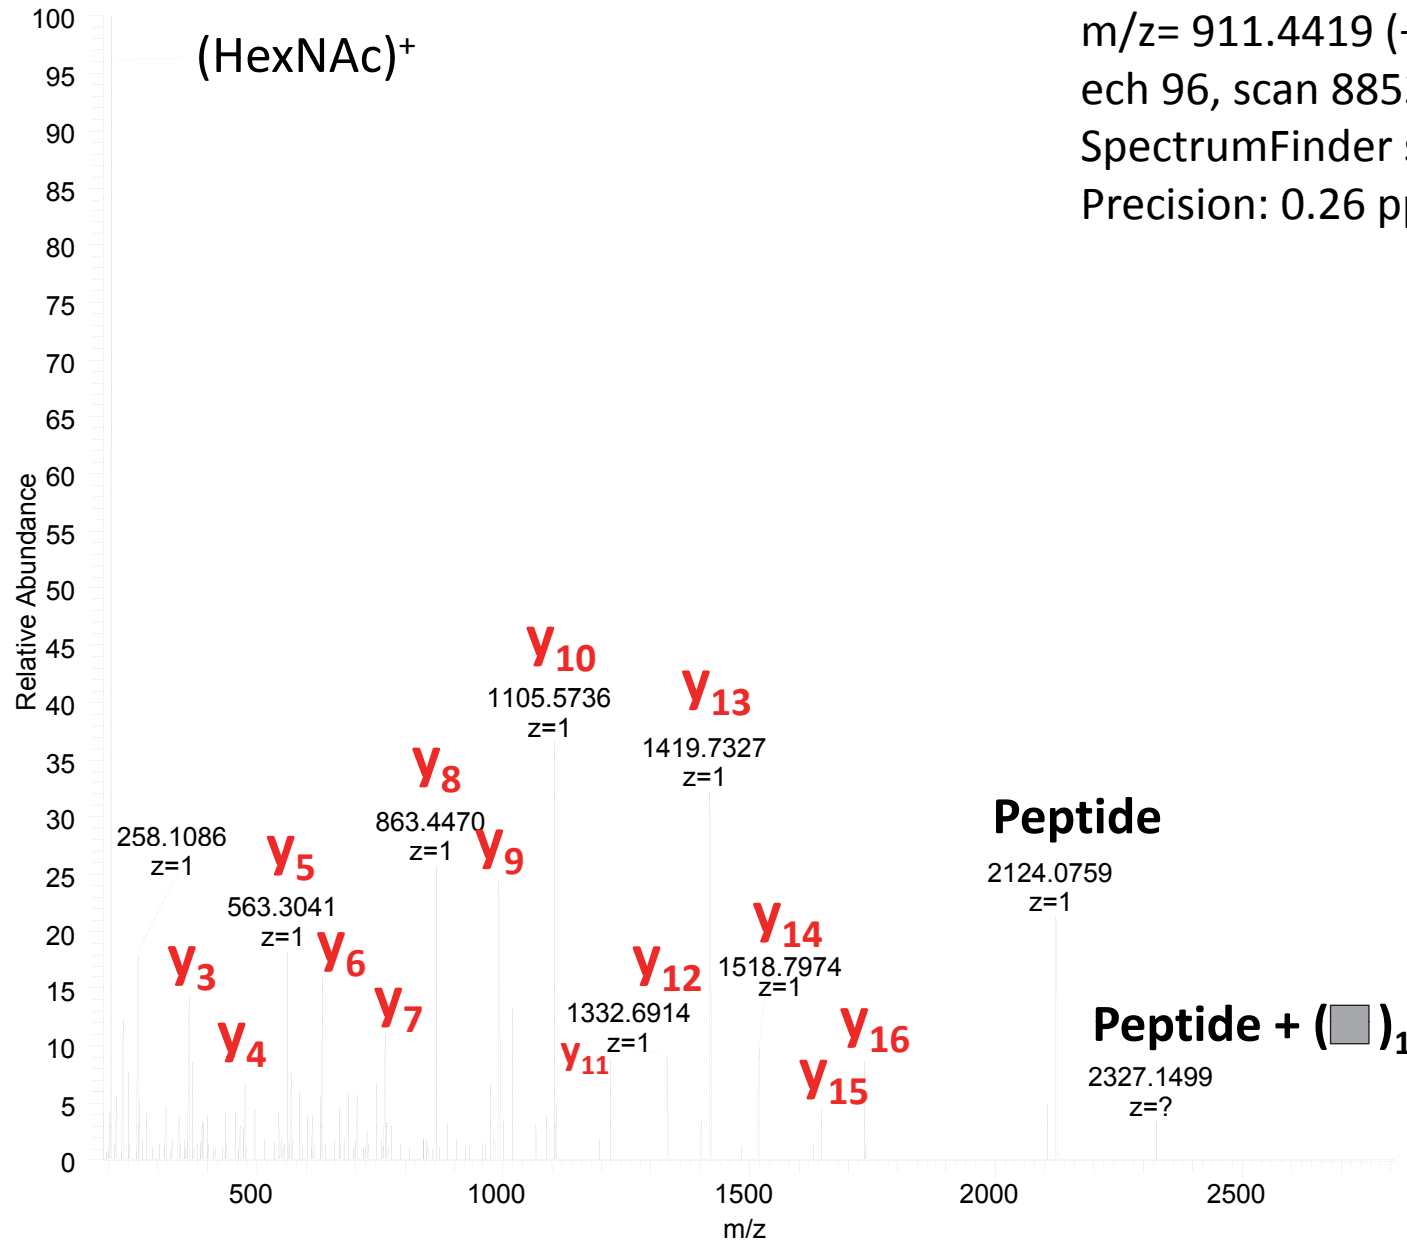

## Supplemental Figure 5d

S<sub>192</sub>TSISEVSNILETQASLTDK<sub>211</sub>

+ 1 HexNAc

m/z = 776.0549 (+3)

ech 96, scan 9429

SpectrumFinder score: 1.08E-09

Precision: -0.56 ppm

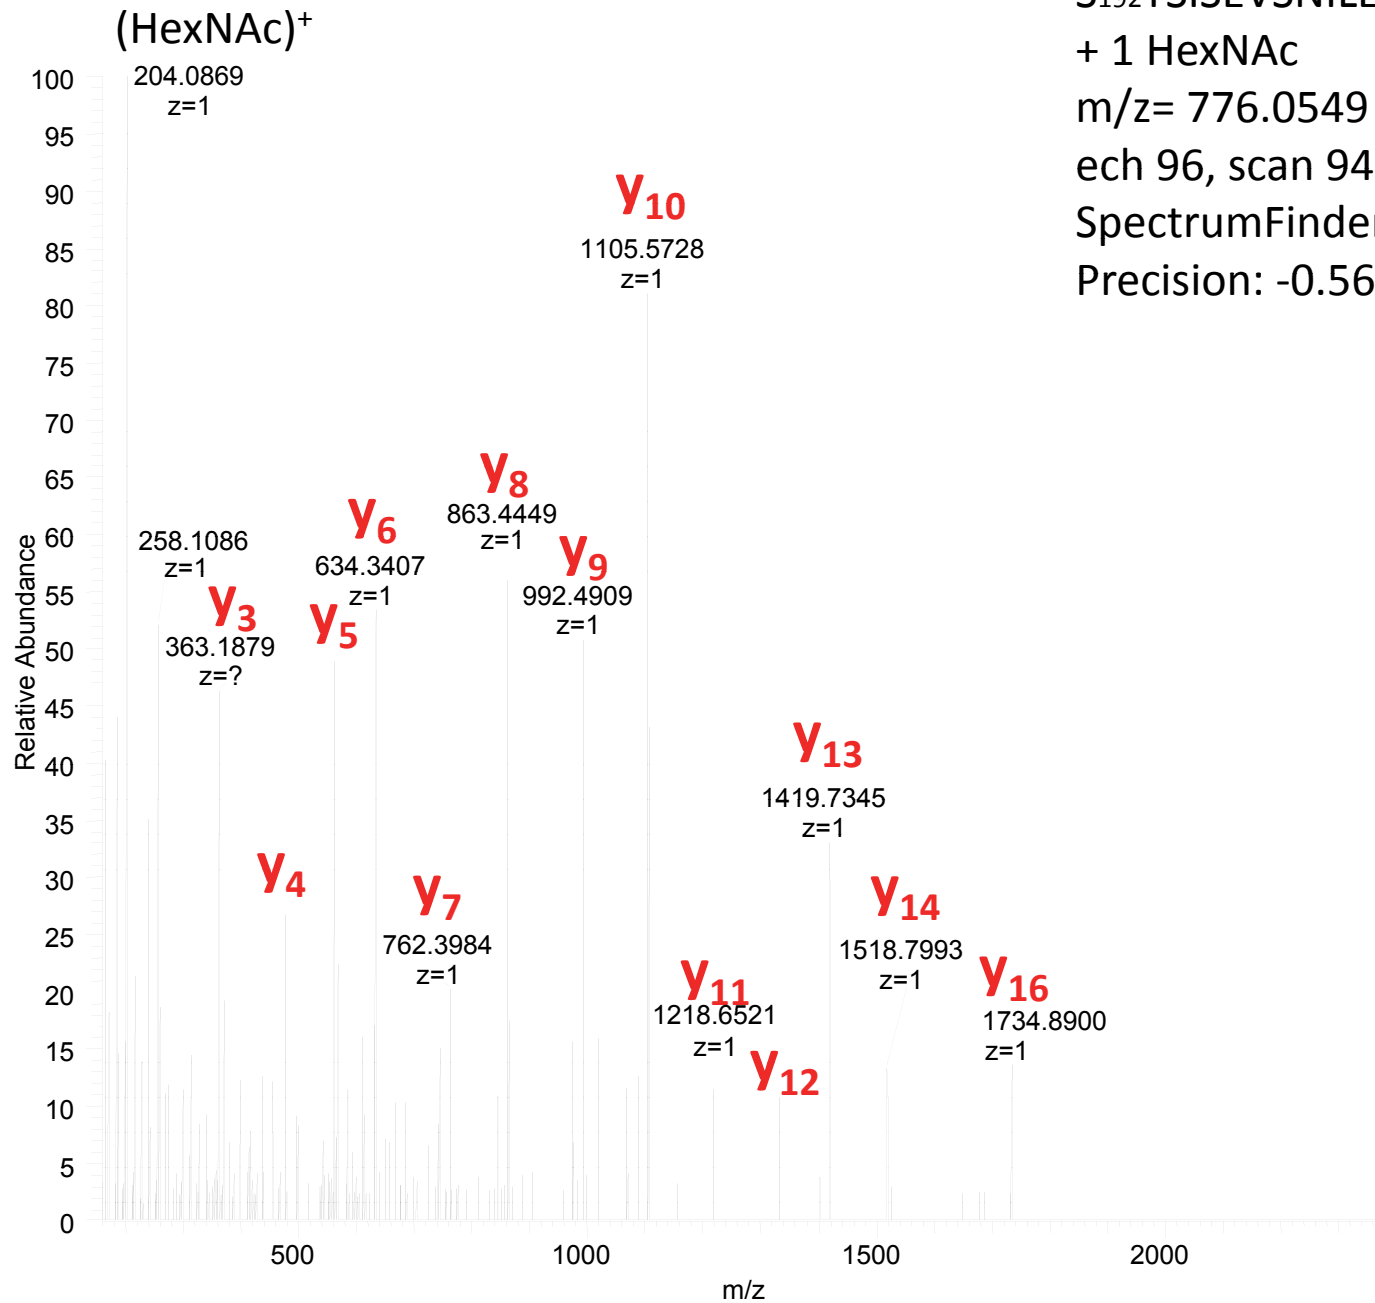

# Supplemental Figure 5e

S<sub>192</sub>TSISEVSNILETQASLTDK<sub>211</sub>

+ 4 HexNAc

m/z = 1468.2003 (+2)

ech 96, scan 8385

SpectrumFinder score: 1.31E-03

Precision: -0.41 ppm

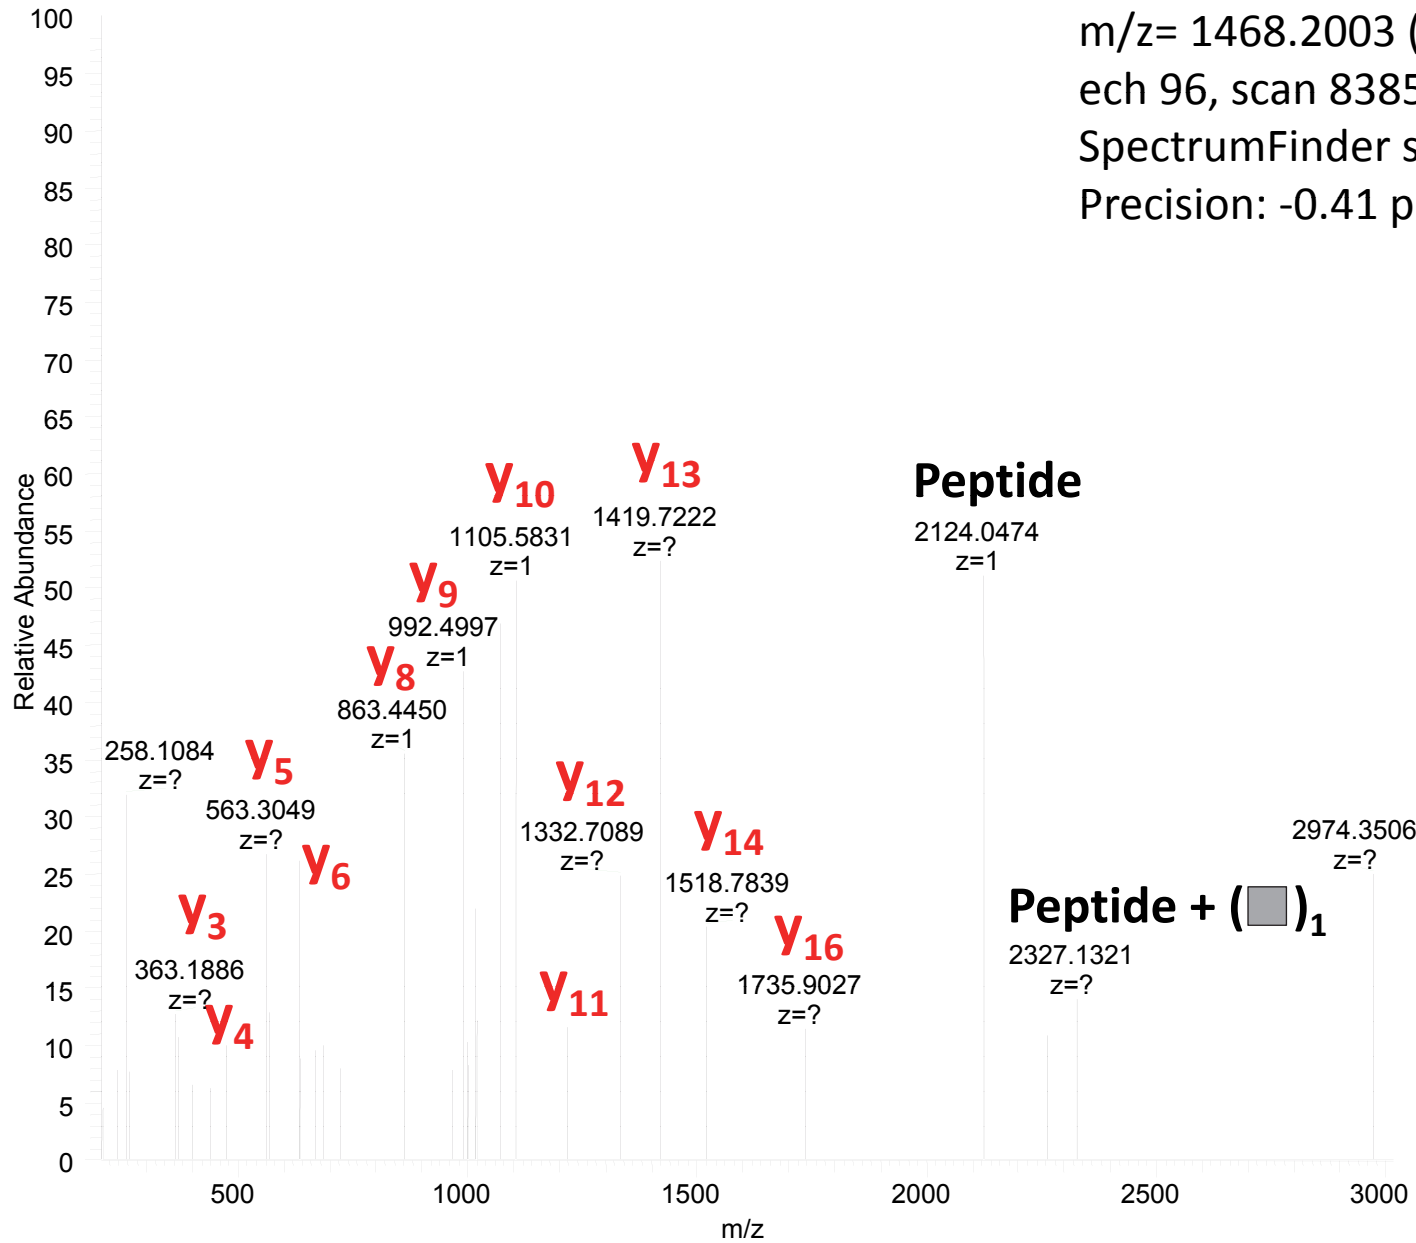

## Supplemental Figure 5f

S<sub>192</sub>TSISEVSNILETQASLTDK<sub>211</sub>

+ 1 O-AcHexNAc + 2 HexNAc

m/z = 925.4456 (+3)

ech 96, scan 9111

SpectrumFinder score: 5.51E-06

Precision: -0.33 ppm

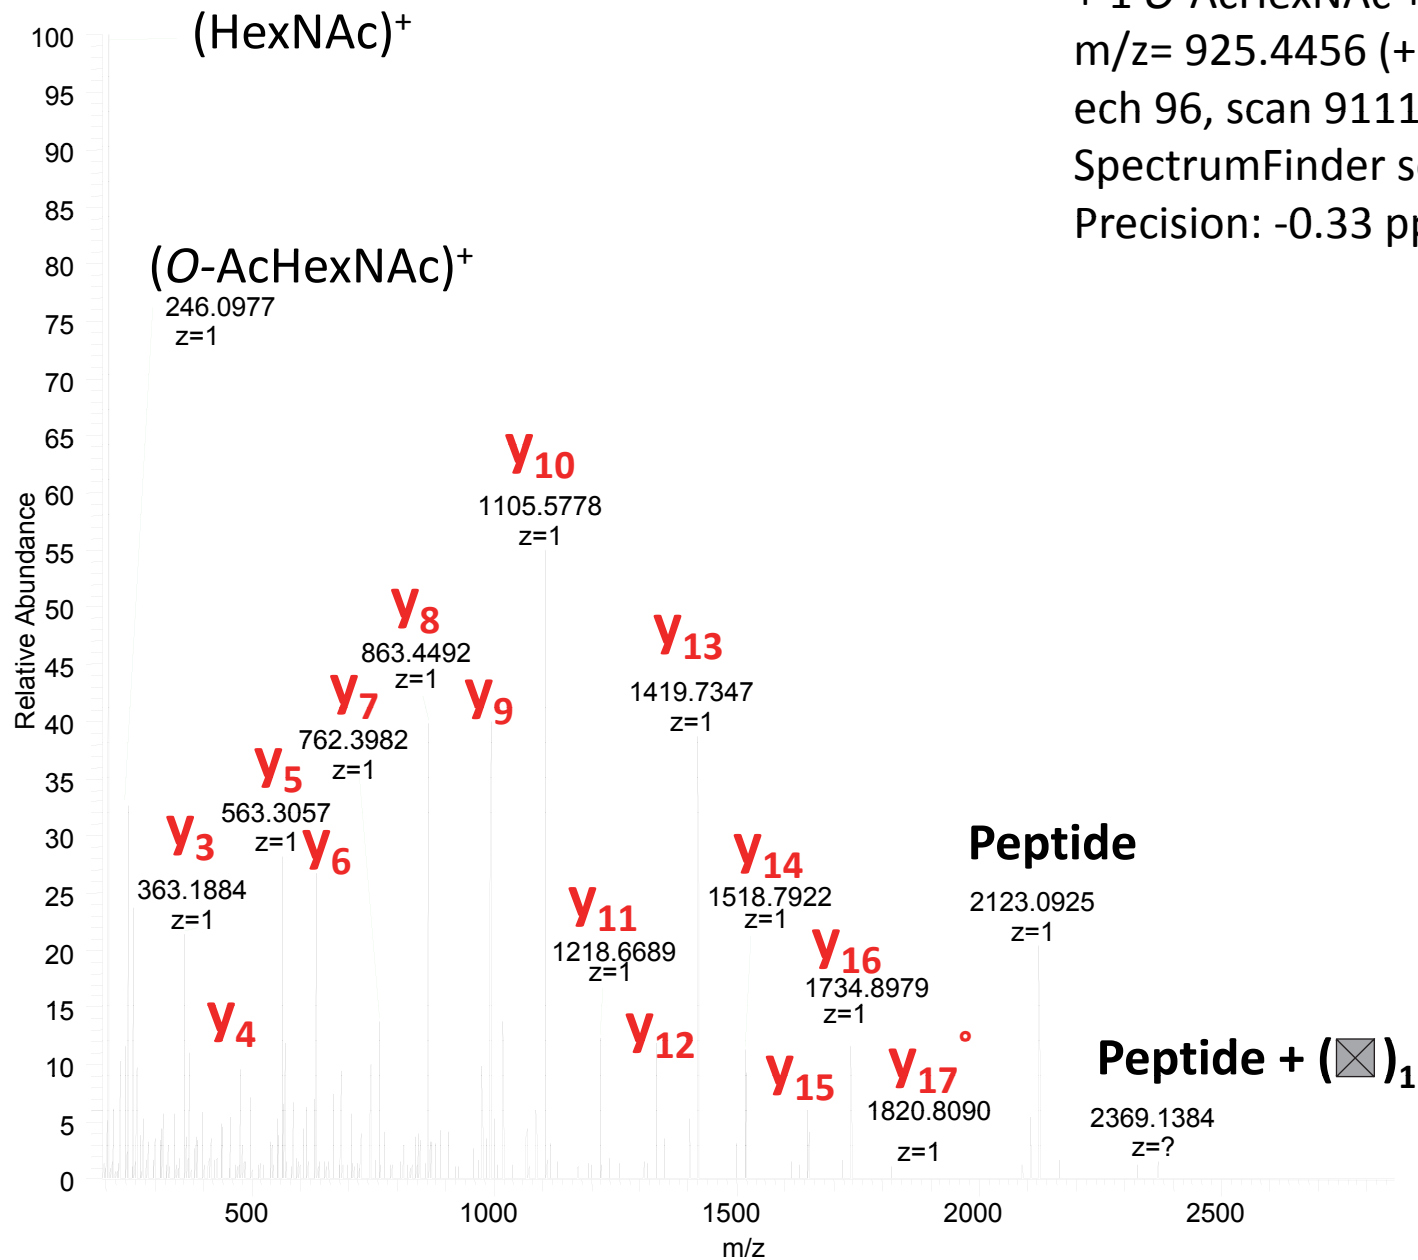

## Supplemental Figure 5g

S<sub>192</sub>TSISEVSNILETQASLTDK<sub>211</sub>

+ 4 HexNAc + 2 Hex

m/z = 1087.1693 (+3)

ech 96, scan 7581

SpectrumFinder score: 4.61E-03

Precision: -0.64 ppm

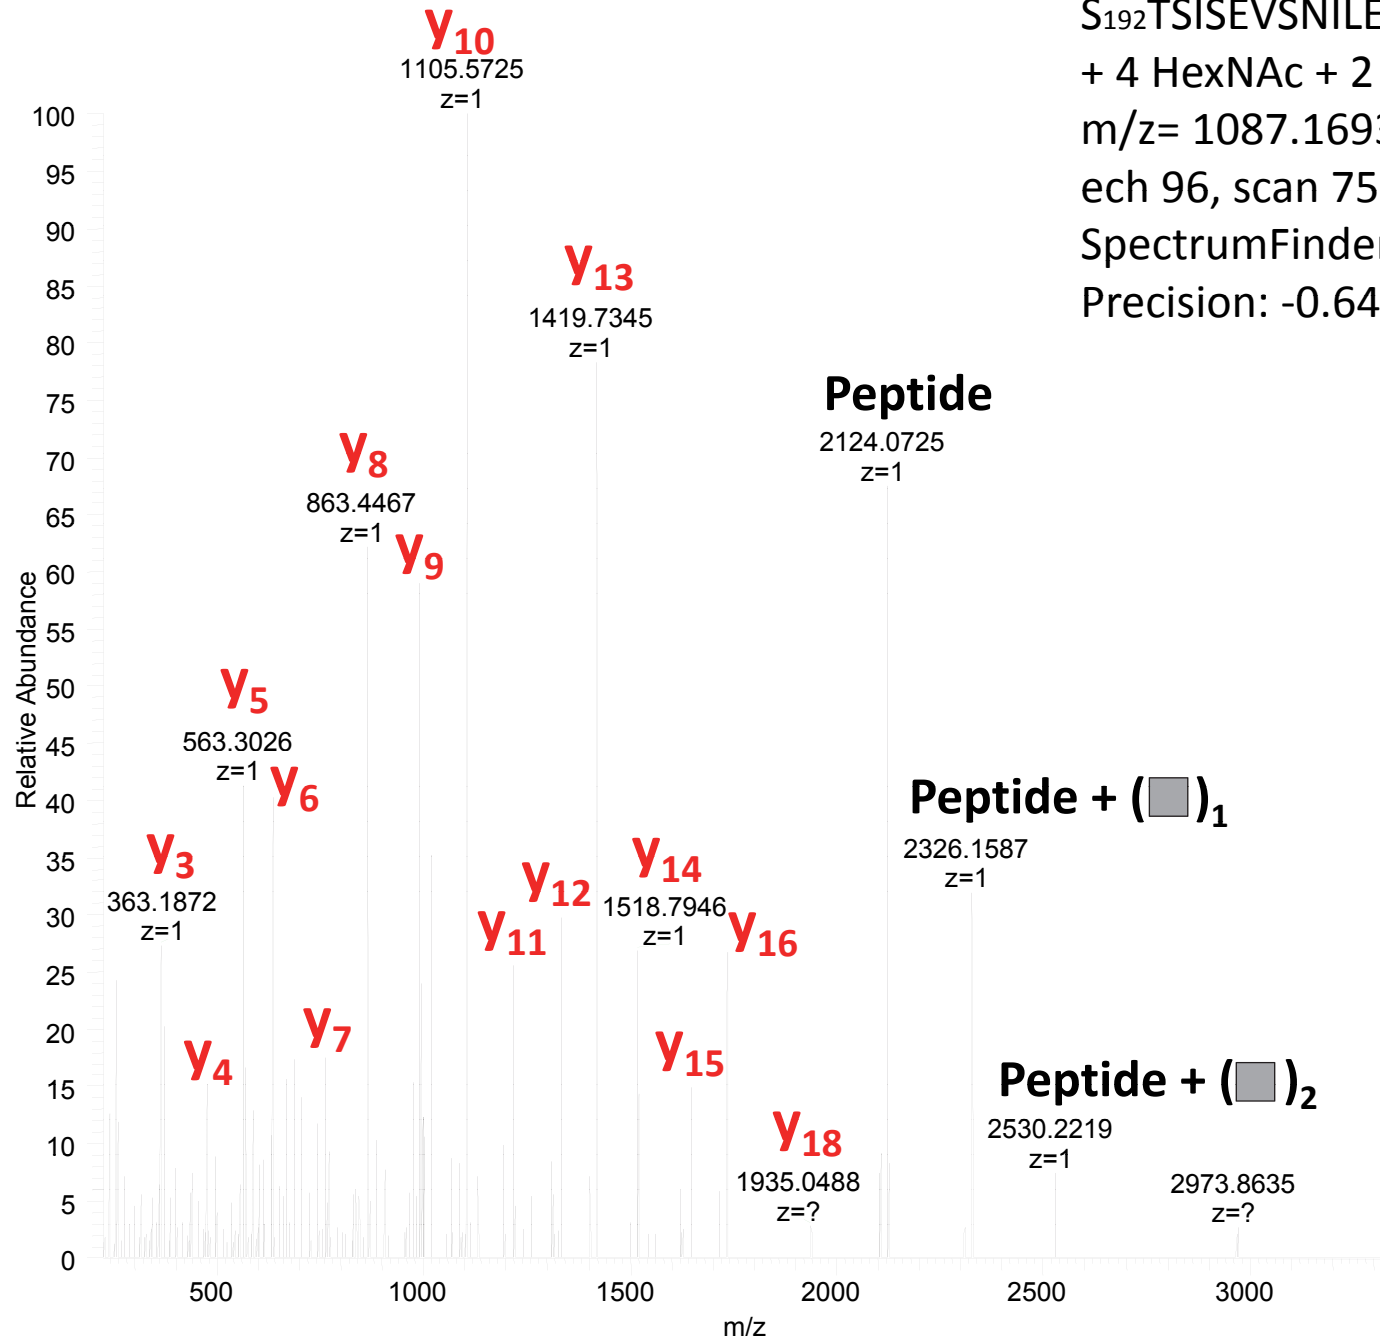



## Supplemental Figure 5h

S<sub>192</sub>TSISEVSNILETQASLTDK<sub>211</sub>

+ 1 *O*-AcHexNAc + 1 HexNAc

*m/z* = 857.7518 (+3)

ech 96, scan 9293

SpectrumFinder score: 6.73E-08

Precision: -0.21 ppm

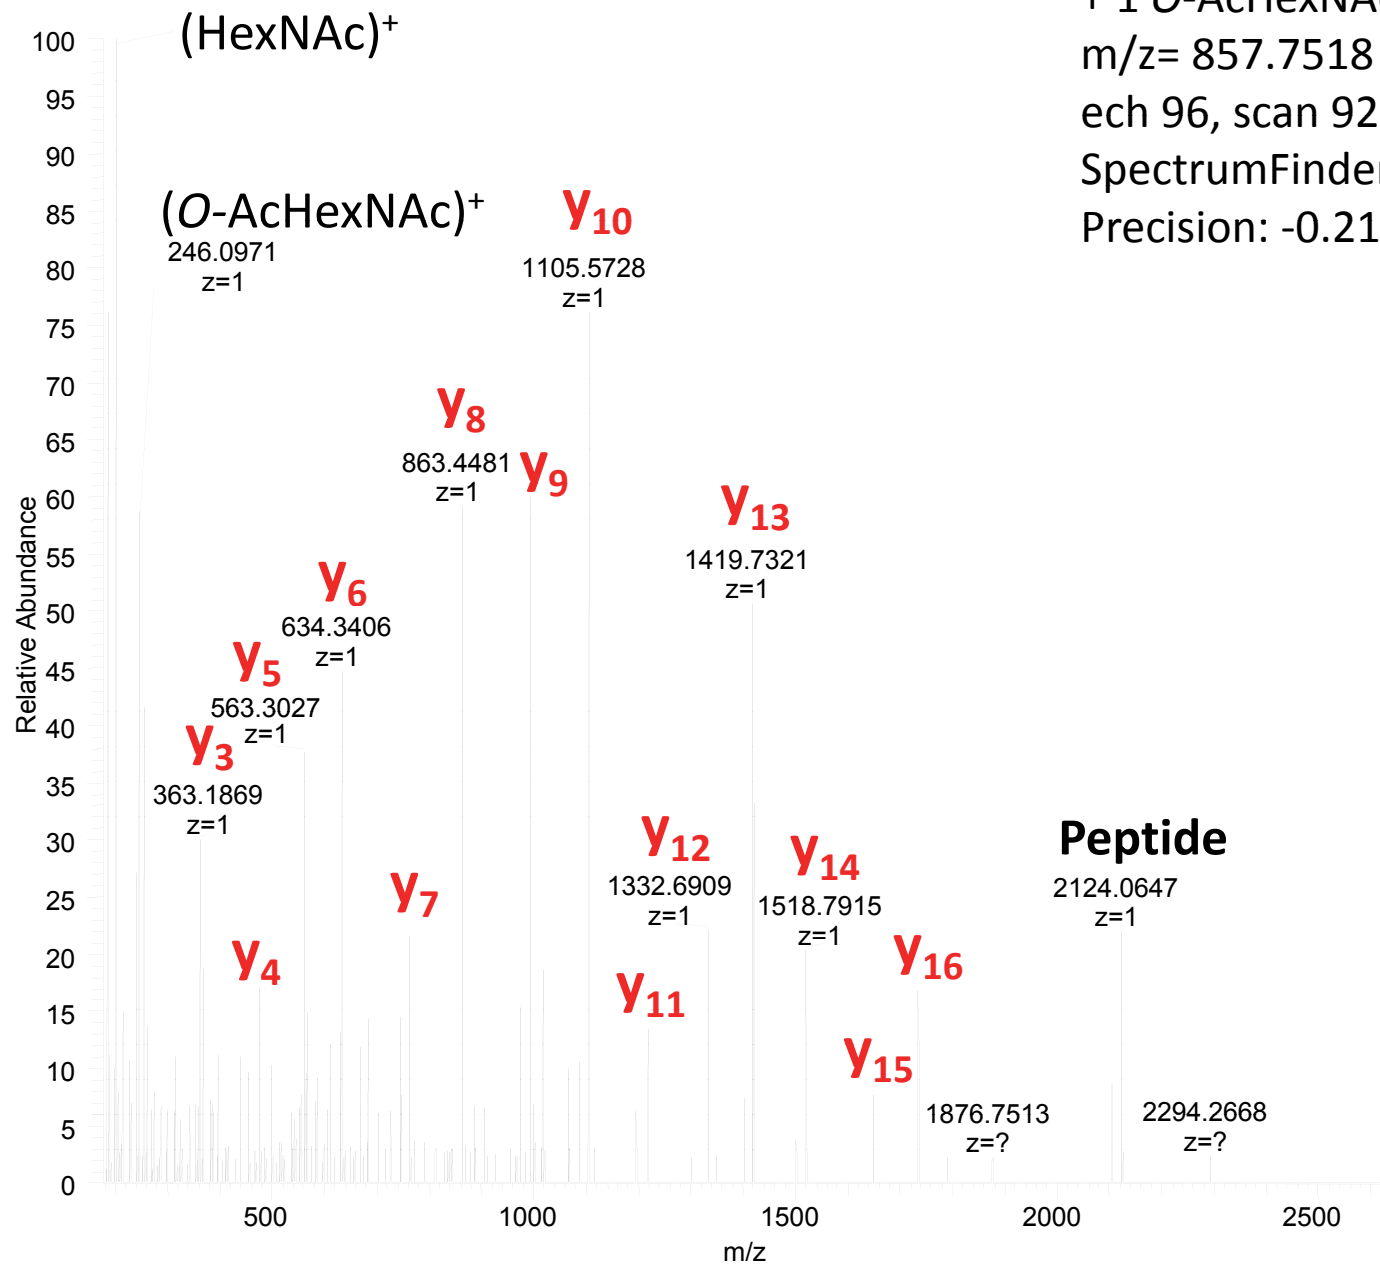

## Supplemental Figure 5i

S<sub>192</sub>TSISEVSNILETQASLTDK<sub>211</sub>

+ 1 O-AcHexNAc + 3 HexNAc

m/z = 1489.2051 (+2)

ech 96, scan 8145

SpectrumFinder score: 4.62E-02

Precision: 1.03 ppm

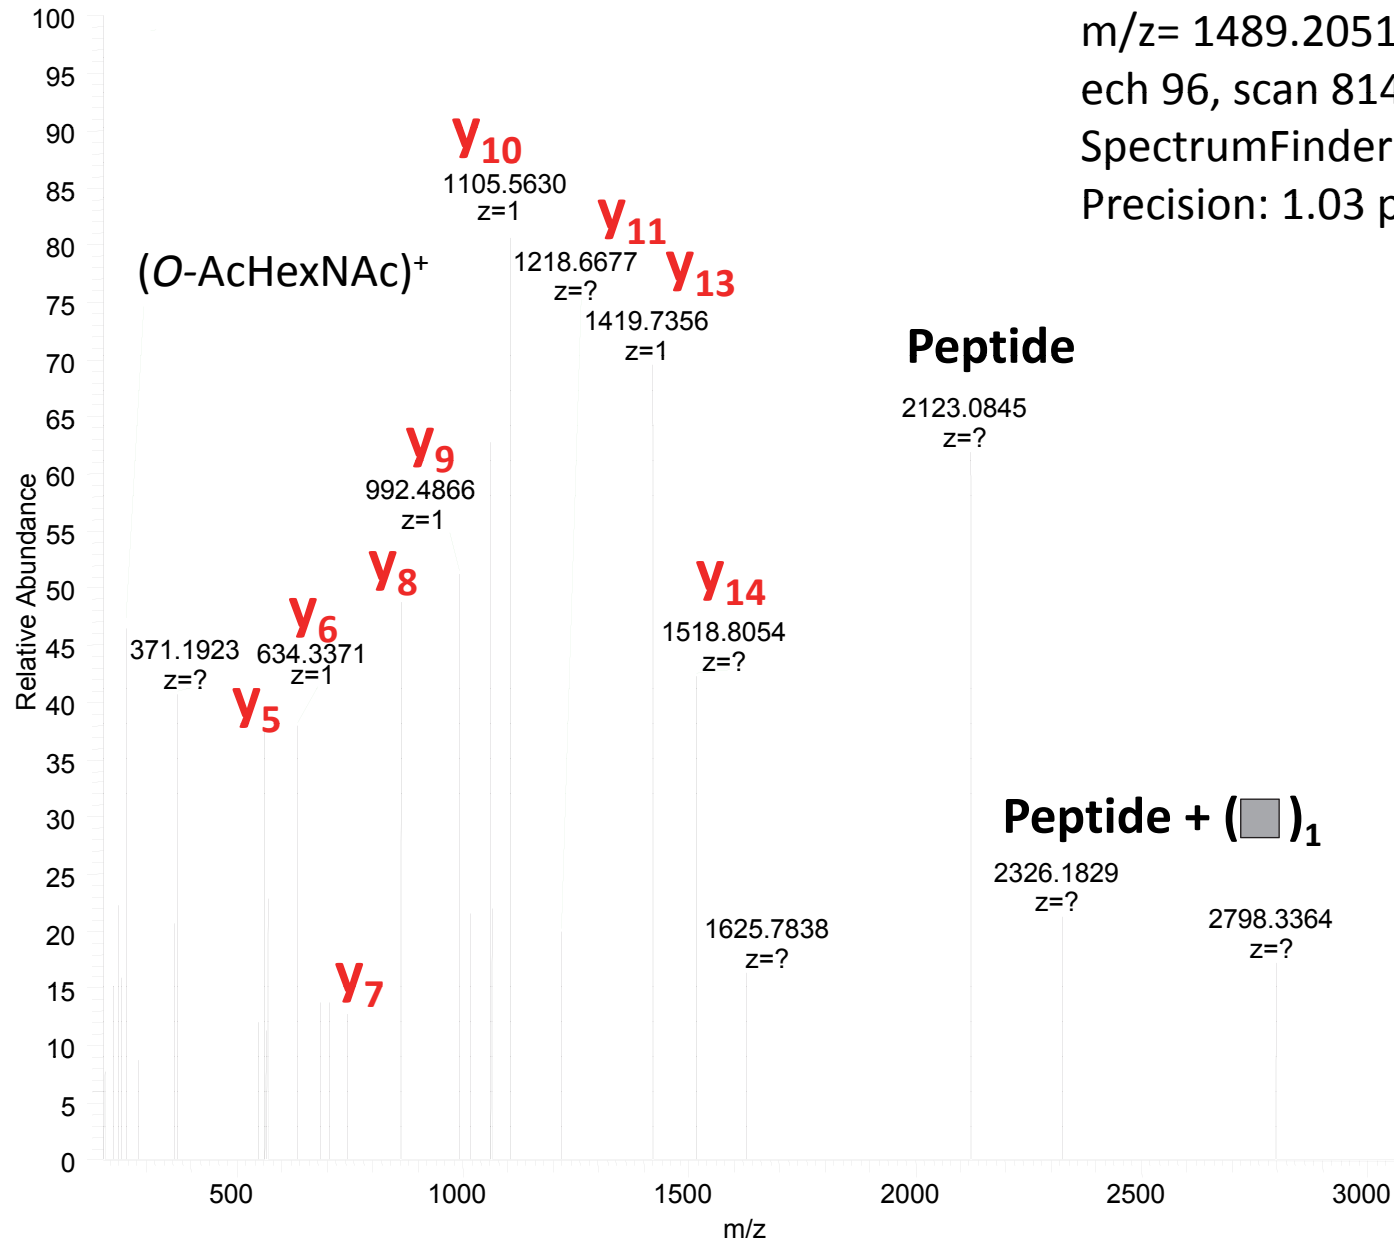

## Supplemental Figure 5j

S<sub>192</sub>TSISEVSNILETQASLTDK<sub>211</sub>

+ 1 O-AcHexNAc + 3 HexNAc + 2 Hex

m/z = 1101.1737 (+3)

ech 96, scan 7777

SpectrumFinder score: 1.38E-02

Precision: 0.05 ppm

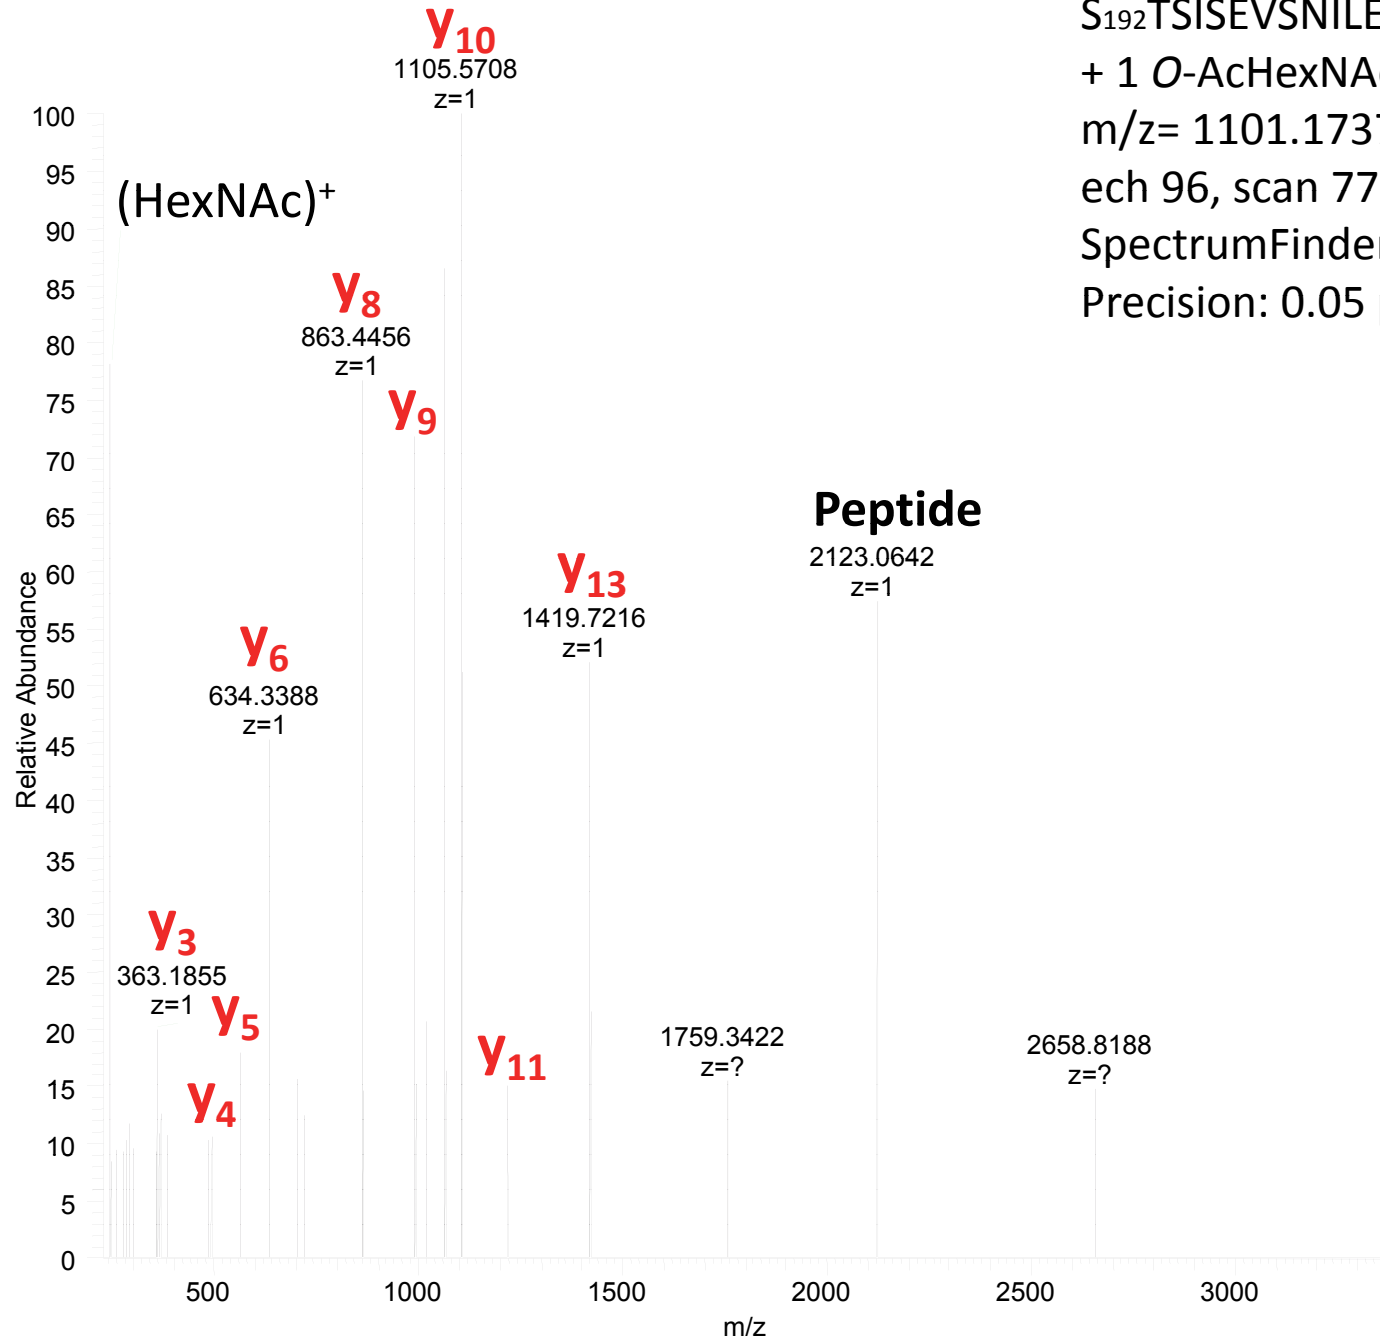

## Supplemental Figure 5k

S<sub>192</sub>TSISEVSNILETQASLTDK<sub>211</sub>

+ 1 O-AcHexNAc

m/z = 790.0579 (+3)

ech 96, scan 9175

SpectrumFinder score: 7.42E-10

Precision: -0.88 ppm

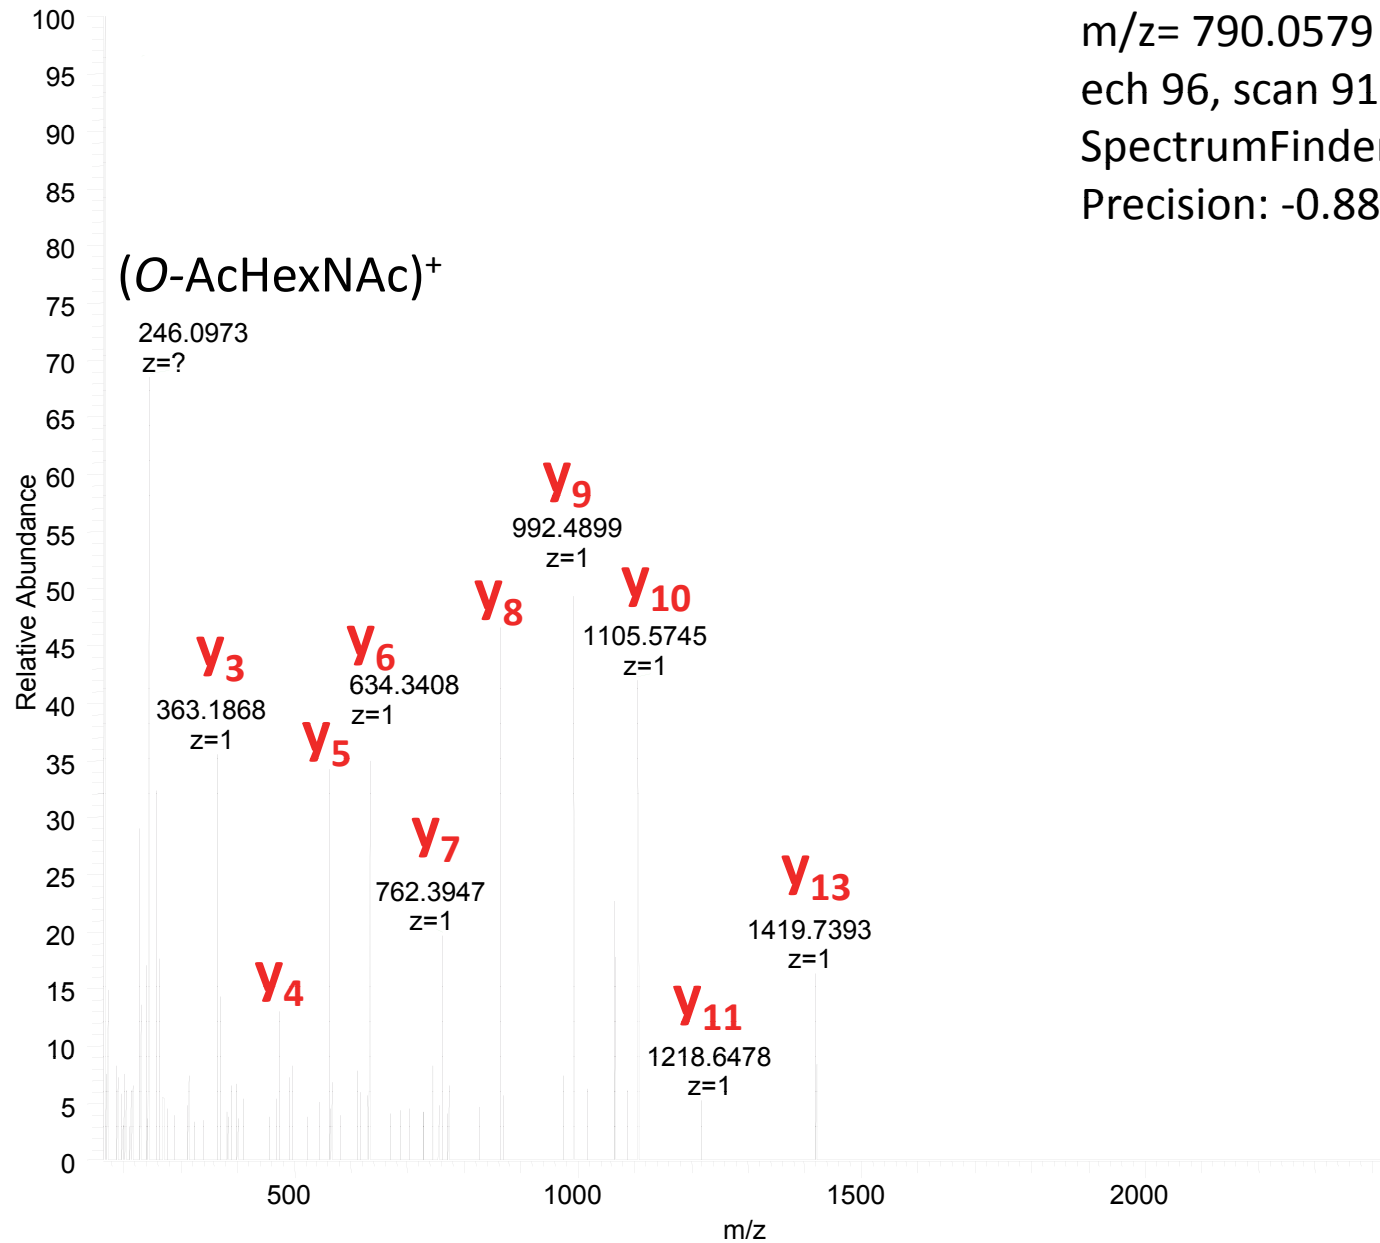

## Supplemental Figure 5I

S<sub>192</sub>TSISEVSNILETQASLTDK<sub>211</sub>

+ 4 HexNAc + 3 Hex

m/z = 1141.1898 (+3)

ech 96, scan 7547

SpectrumFinder score: 1.13E-03

Precision: 1.91 ppm

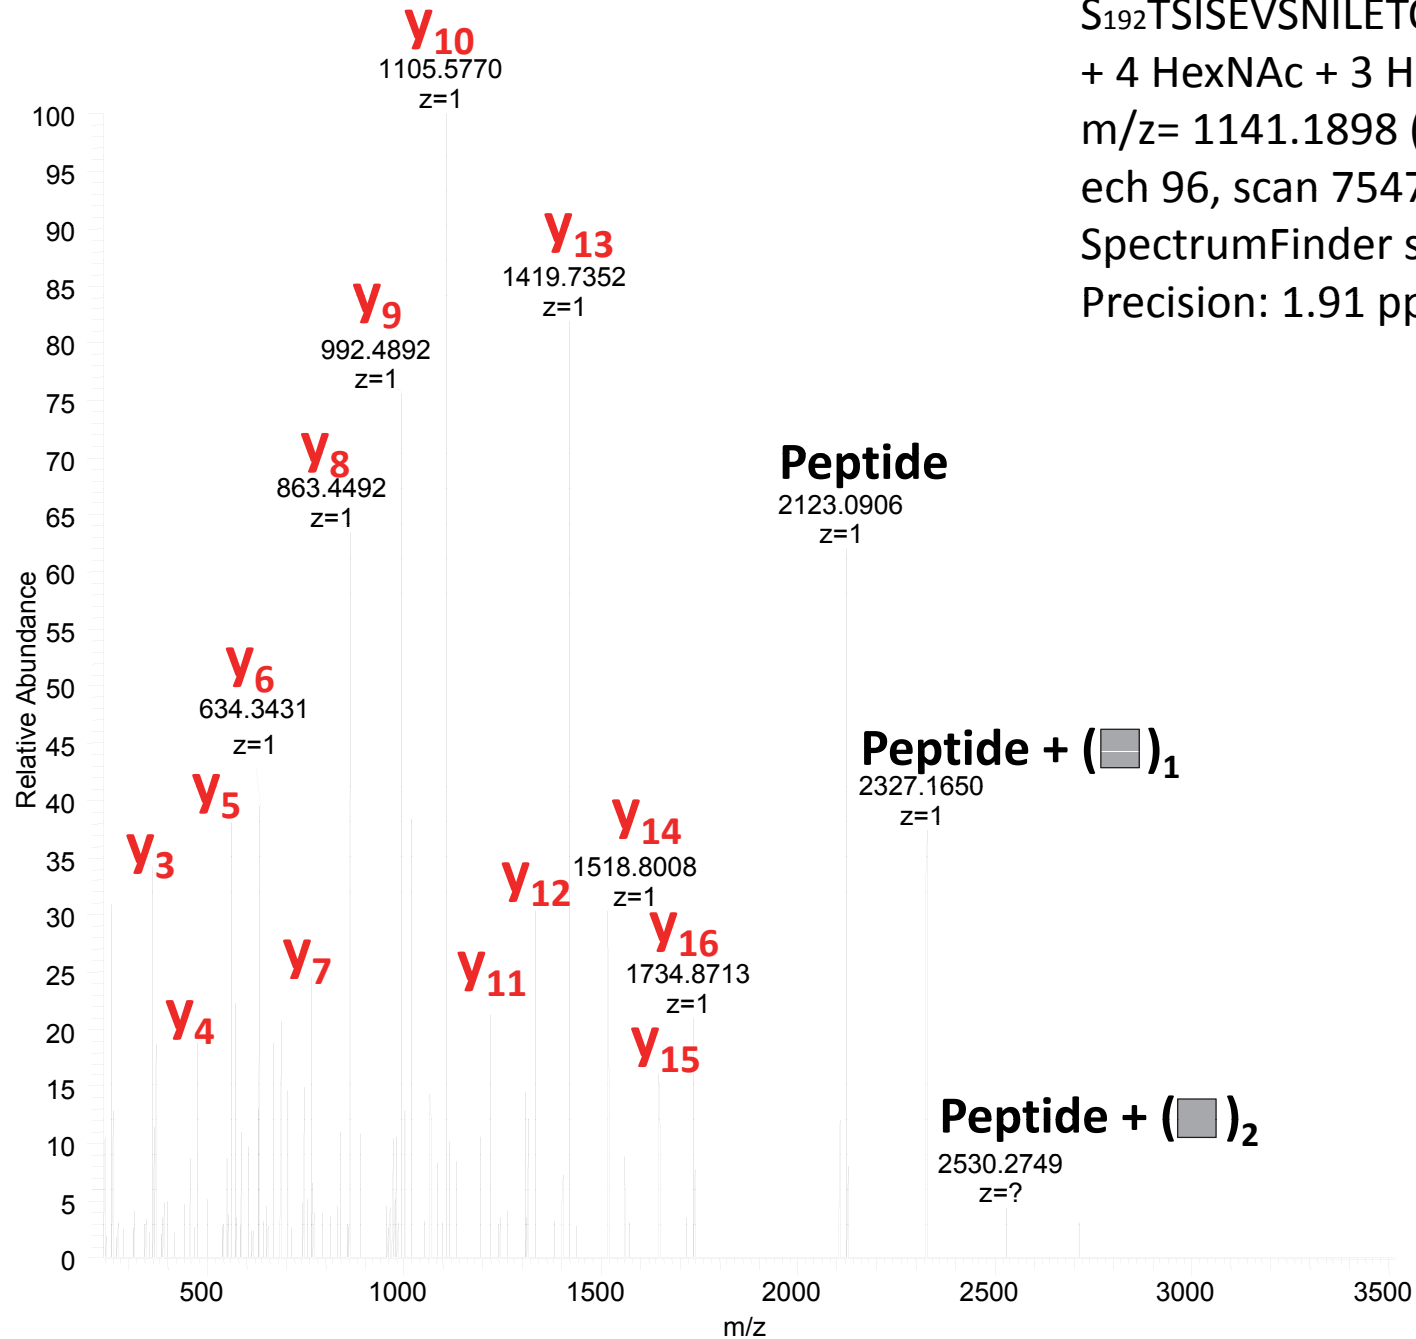

## Supplemental Figure 5m

S<sub>192</sub>TSISEVSNILETQASLTDK<sub>211</sub>

+ 5 HexNAc + 2 Hex

m/z = 1154.8633 (+3)

ech 96, scan 7241

SpectrumFinder score: Manual detection

Precision: NA

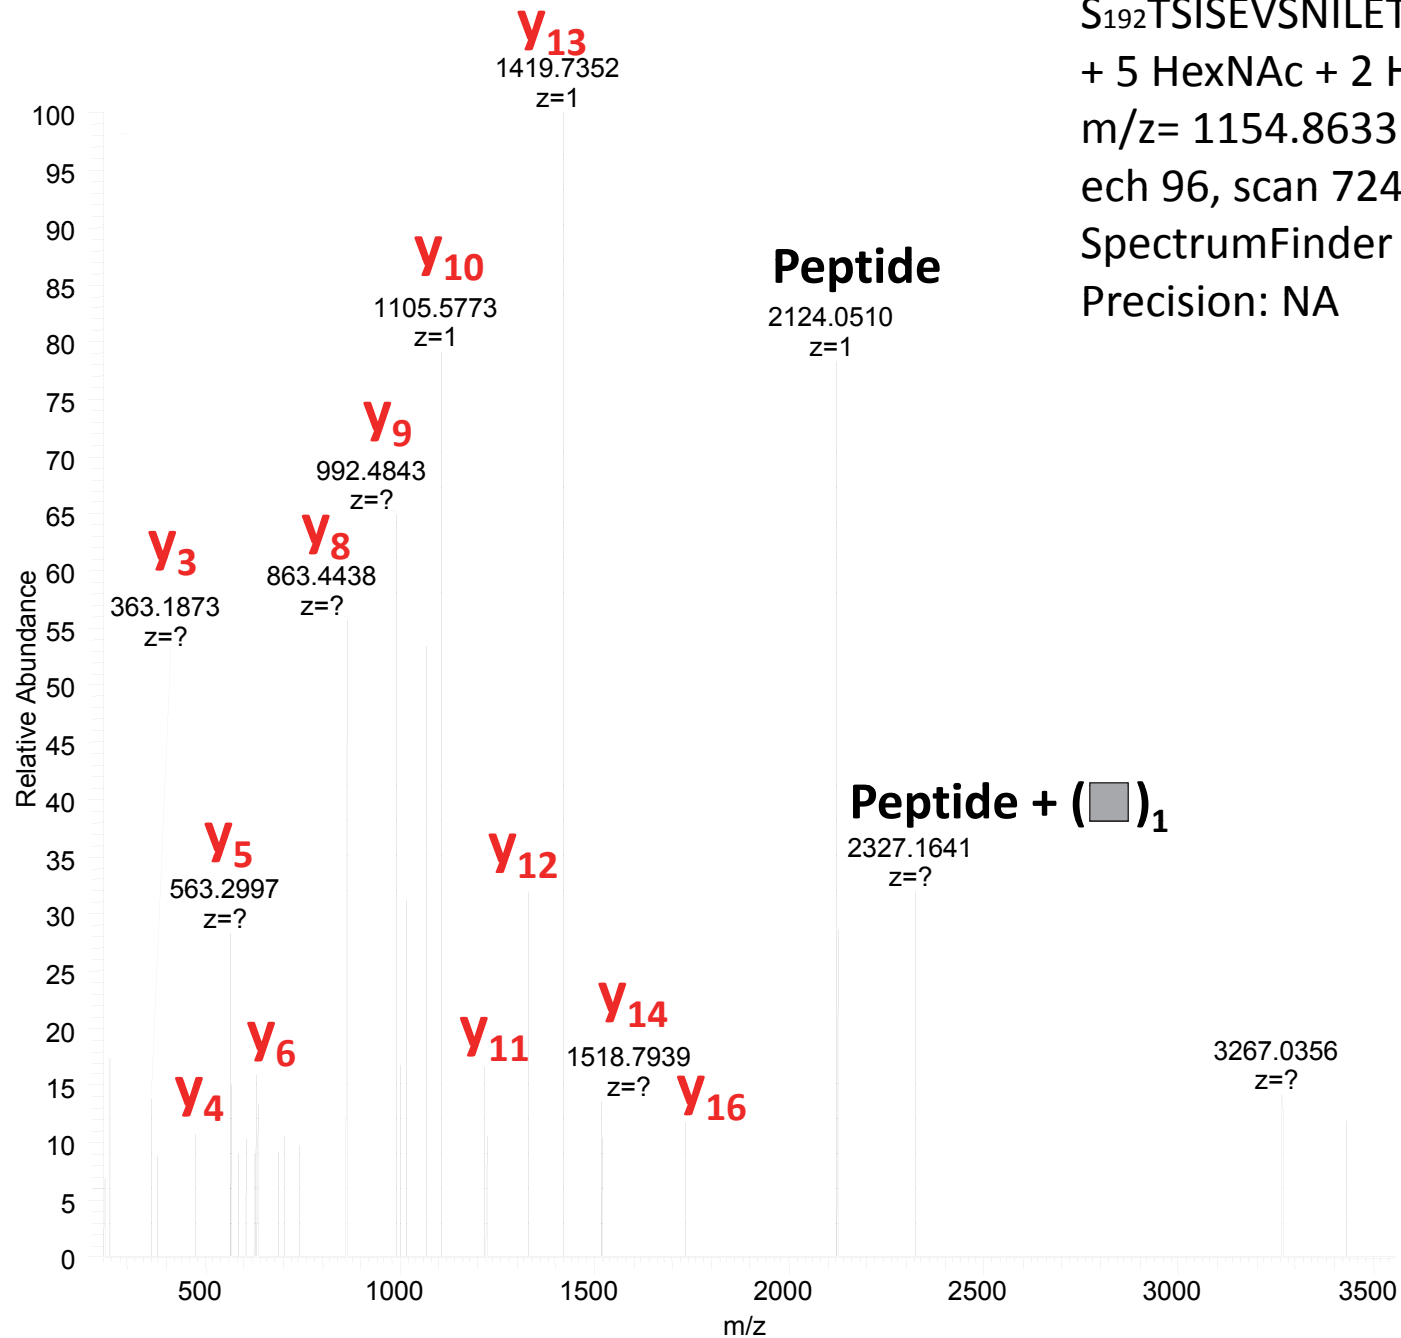

## Supplemental Figure 5n

S<sub>192</sub>TSISEVSNILETQASLTDK<sub>211</sub>

+ 2 *O*-AcHexNAc + 1 HexNAc

*m/z* = 939.4503 (+3)

ech 96, scan 9195

SpectrumFinder score: 1.31E-03

Precision: 1.79 ppm

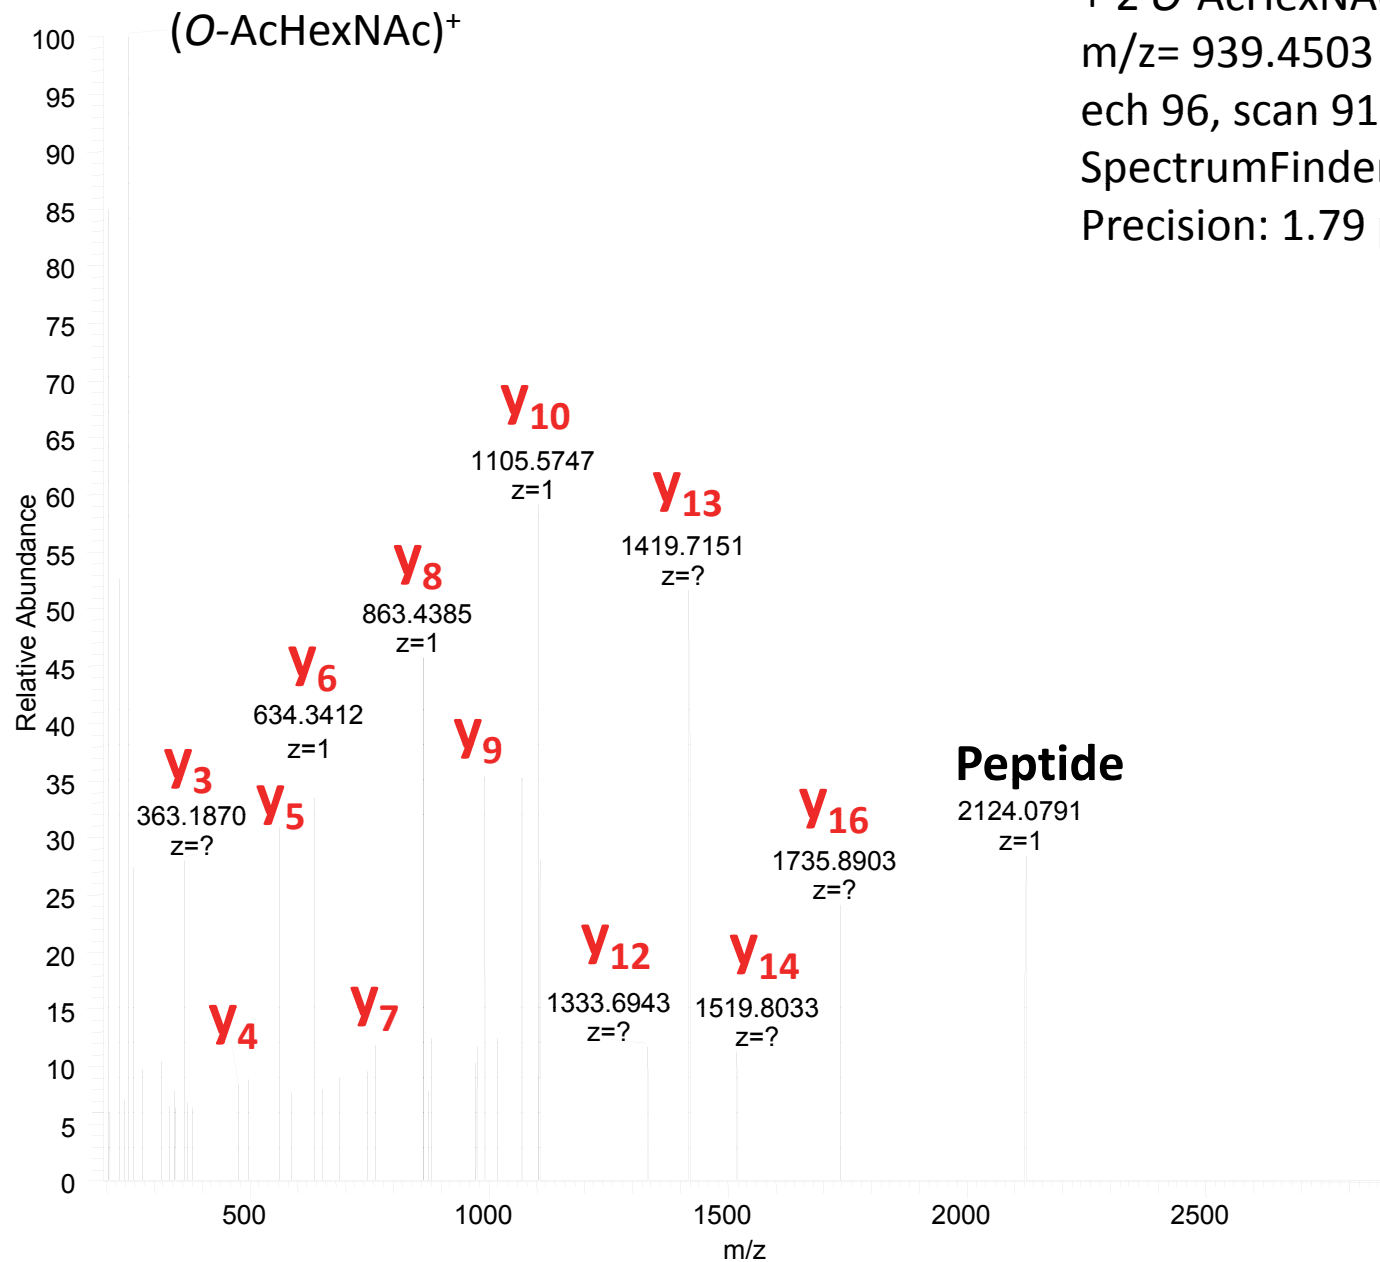

## Supplemental Figure 5o

S<sub>192</sub>TSISEVSNILETQASLTDK<sub>211</sub>

+ 4 HexNAc + 1 Hex

m/z = 1033.1532 (+3)

ech 96, scan 7649

SpectrumFinder score: 1.92E-02

Precision: 0.84 ppm

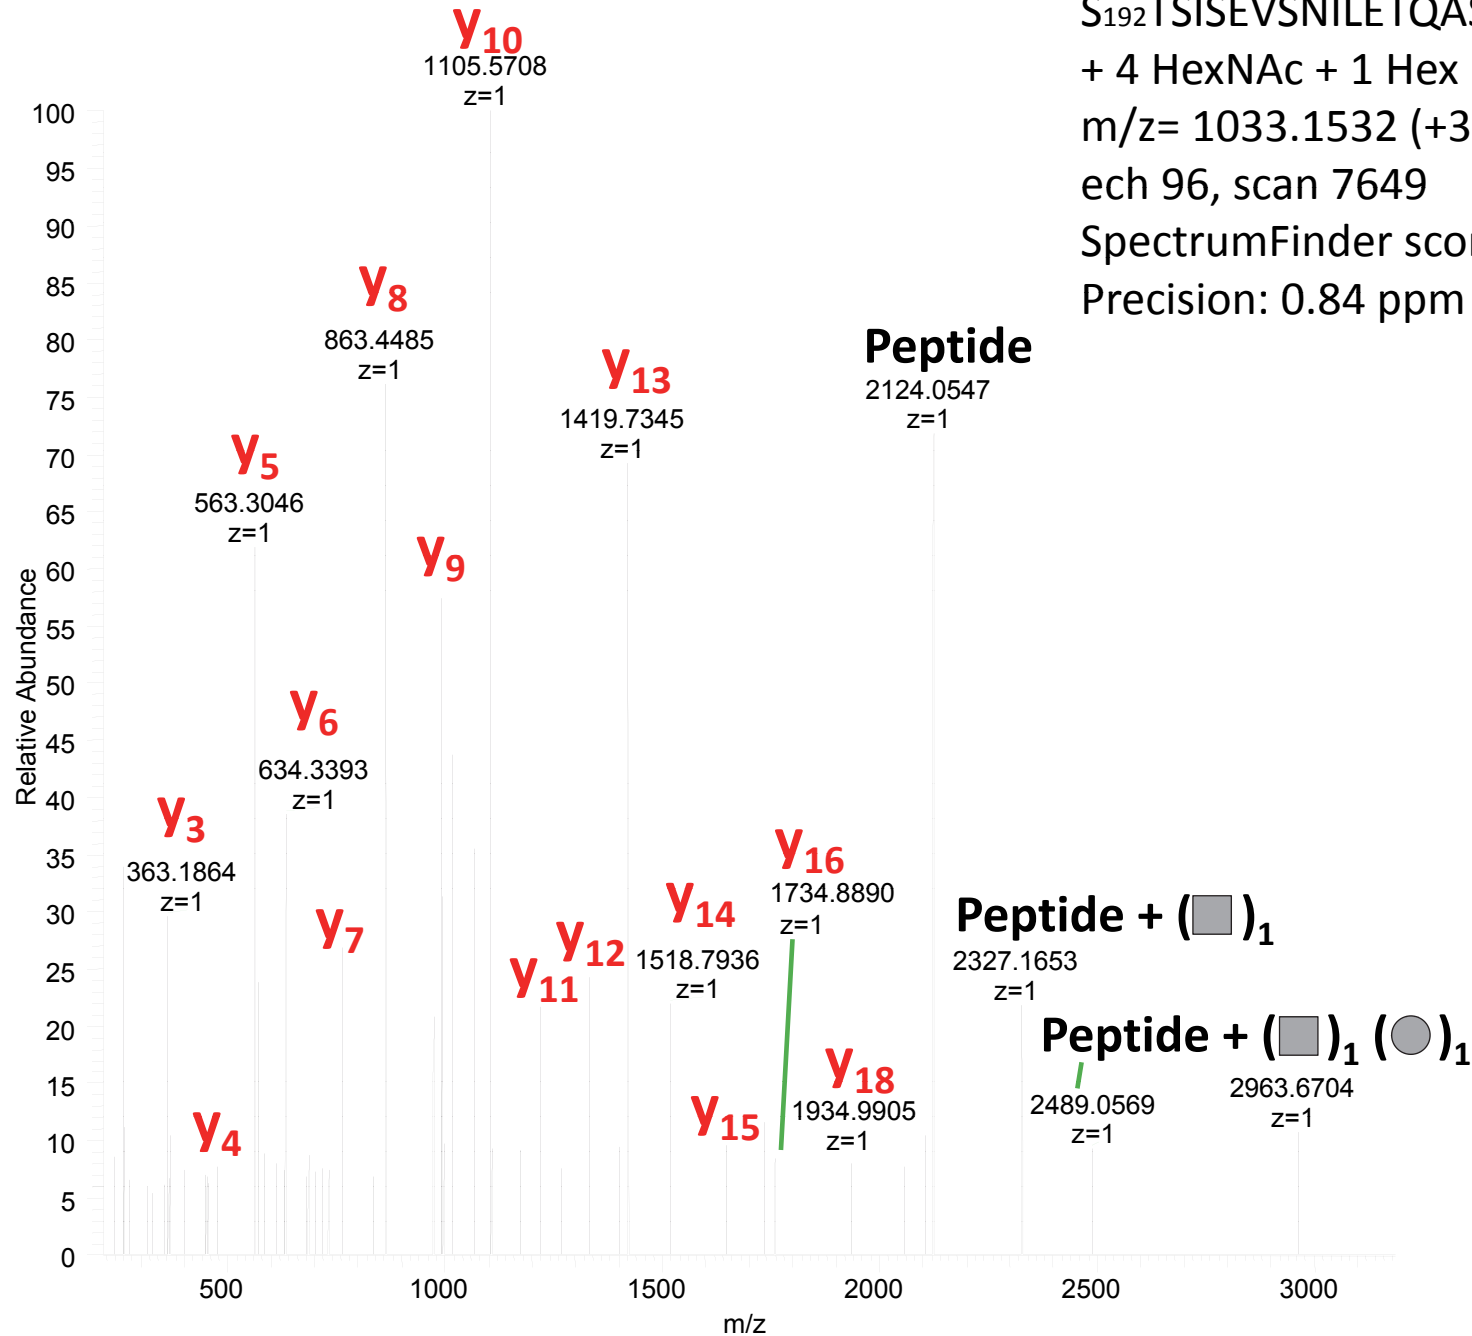



## Supplemental Figure 5p

S<sub>192</sub>TSISEVSNILETQASLTDK<sub>211</sub>

+ 2 O-AcHexNAc

m/z = 871.7542 (+3)

ech 96, scan 9390

SpectrumFinder score: 1.13E-05

Precision: -0.85 ppm

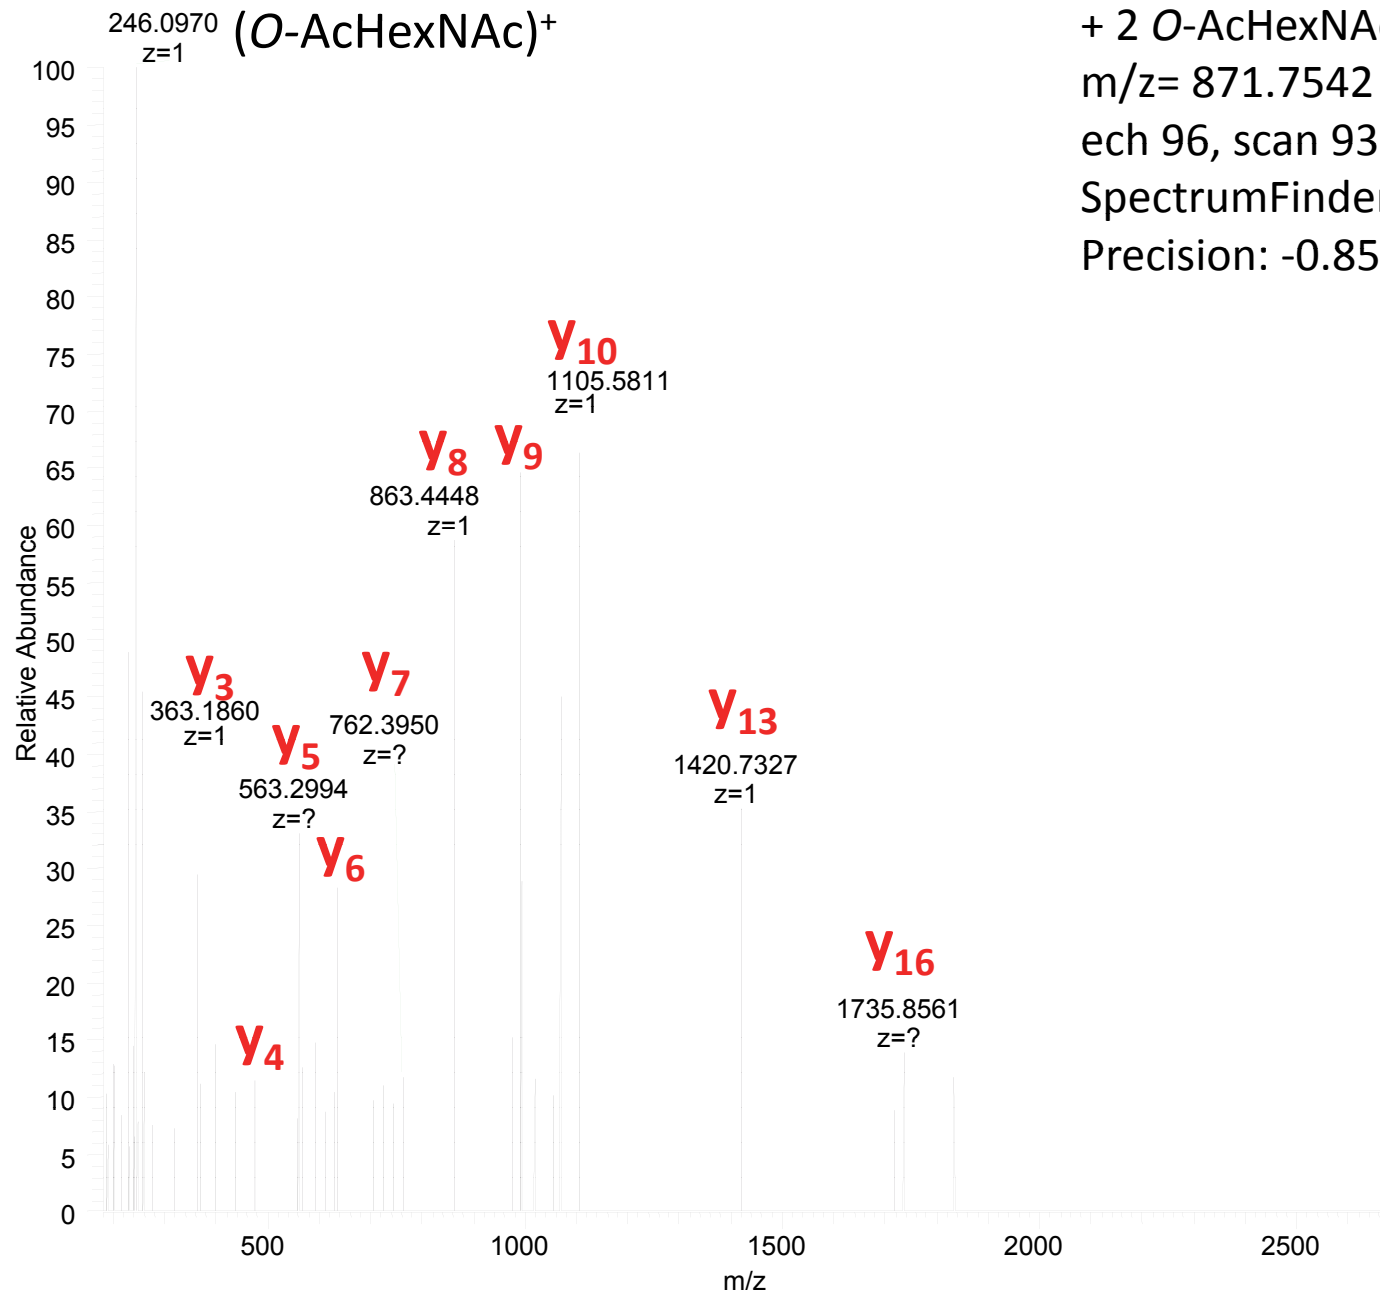

## Supplemental Figure 5q

S<sub>192</sub>TSISEVSNILETQASLTDK<sub>211</sub>

+ 1 O-AcHexNAc + 4 HexNAc

m/z = 1060.8307 (+3)

ech 96, scan 7801

SpectrumFinder score: Manual detection

Precision: NA

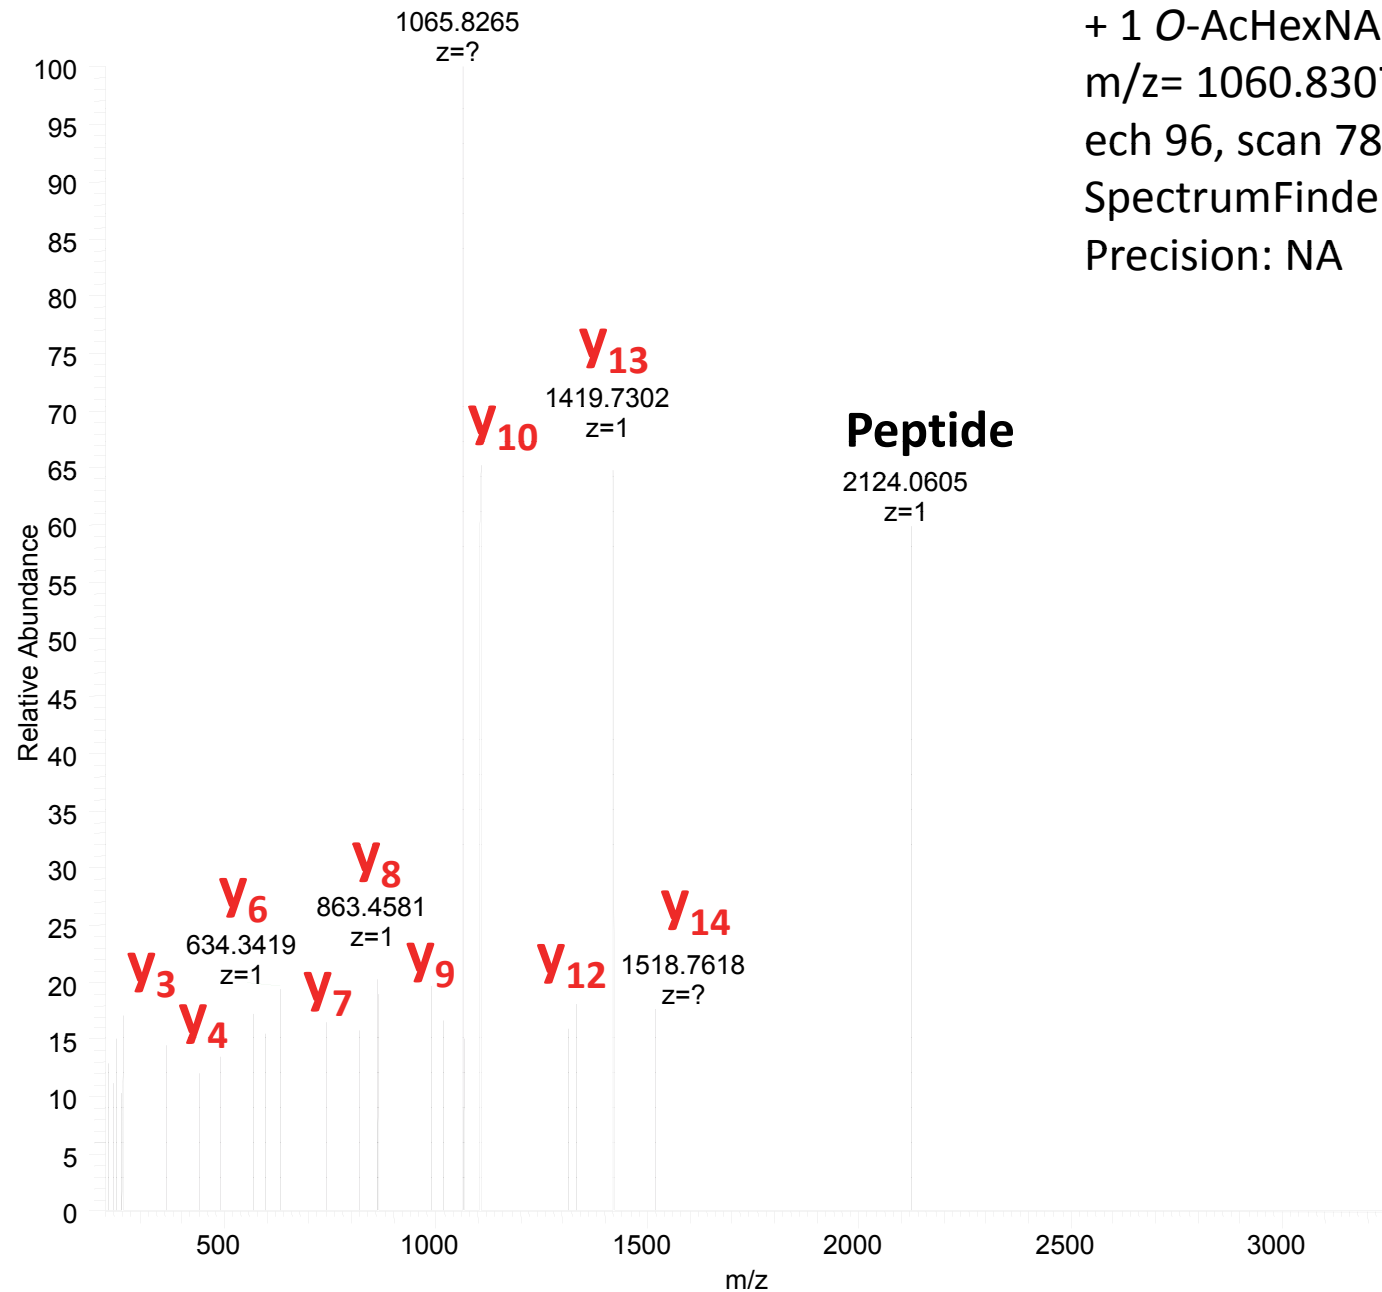

## Supplemental Figure 5r

E<sub>214</sub>SFSANQIVTESSLVTDAGK<sub>233</sub>

SpectrumFinder reference

m/z= 1042.0123 (+2)

ech 96\_01, scan 8526

SpectrumFinder score: 1.11E-16

Precision: -0.47 ppm

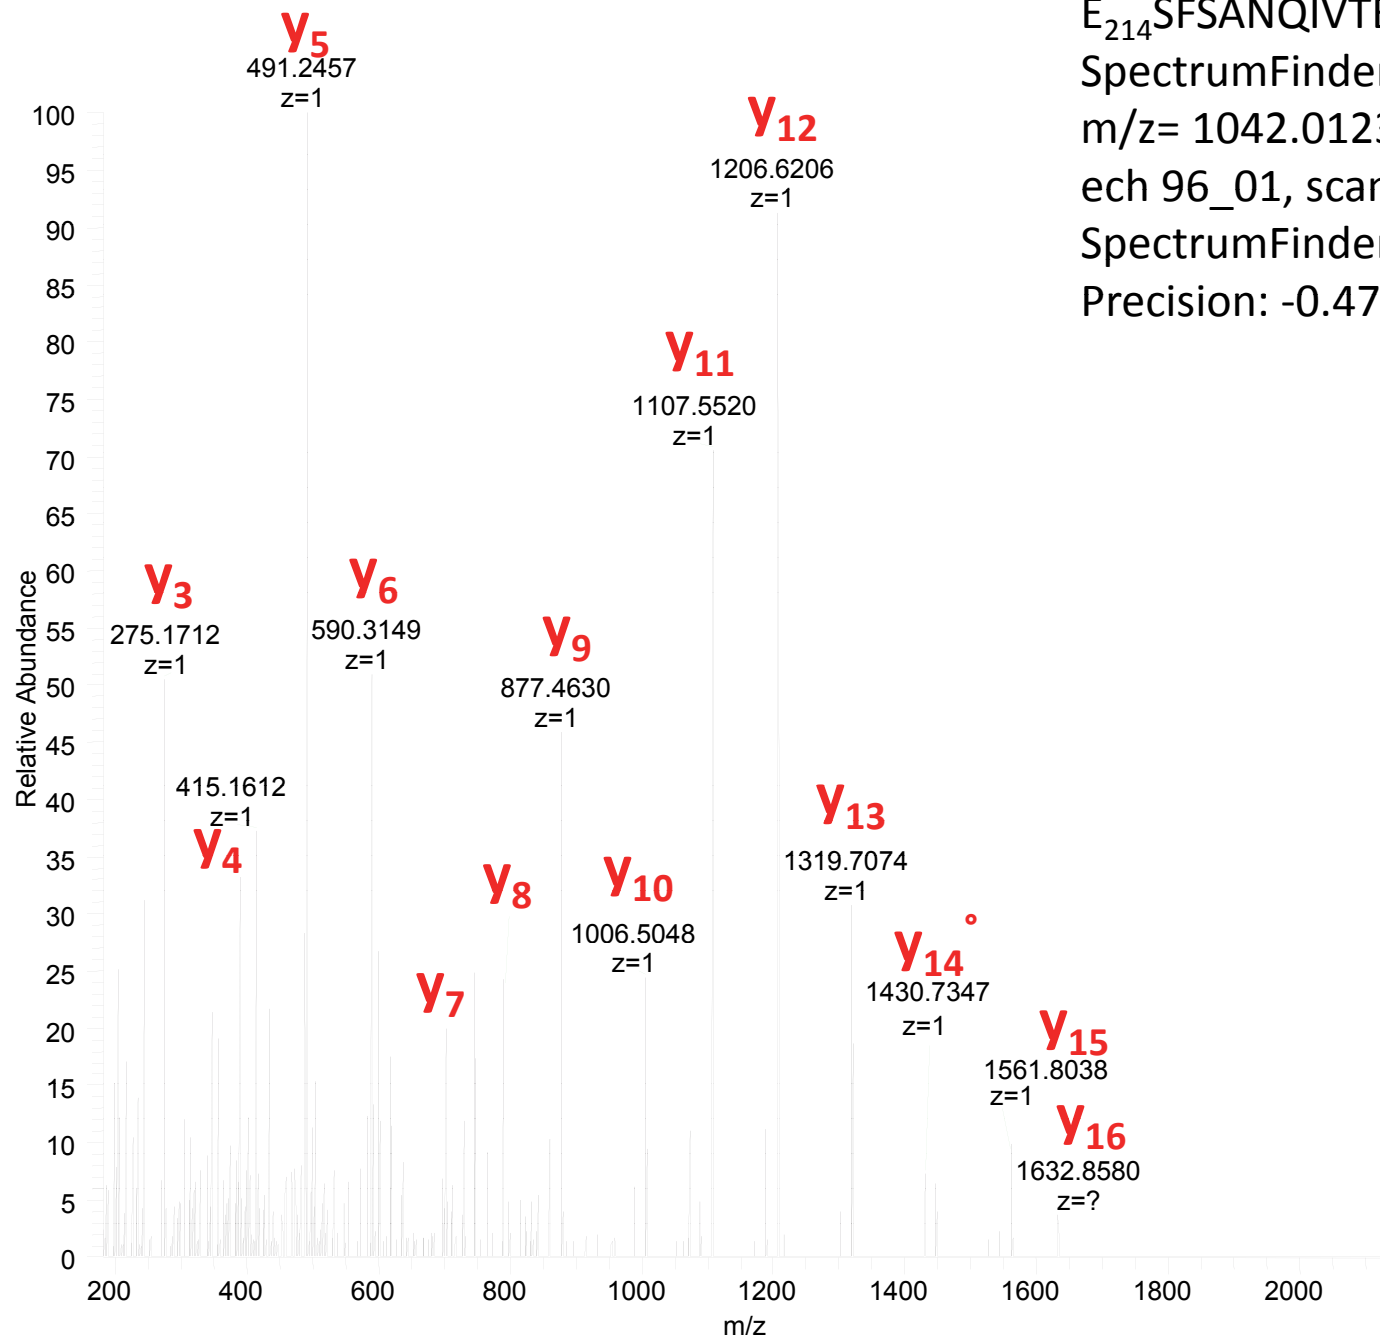

## Supplemental Figure 5s

E<sub>214</sub>SFSANQIVTESSLVTDAGK<sub>233</sub>

+ 1 HexNAc

m/z = 1143.5543 (+2)

ech 96\_01, scan 8238

SpectrumFinder score: 0.00E+00

Precision: 0.95 ppm

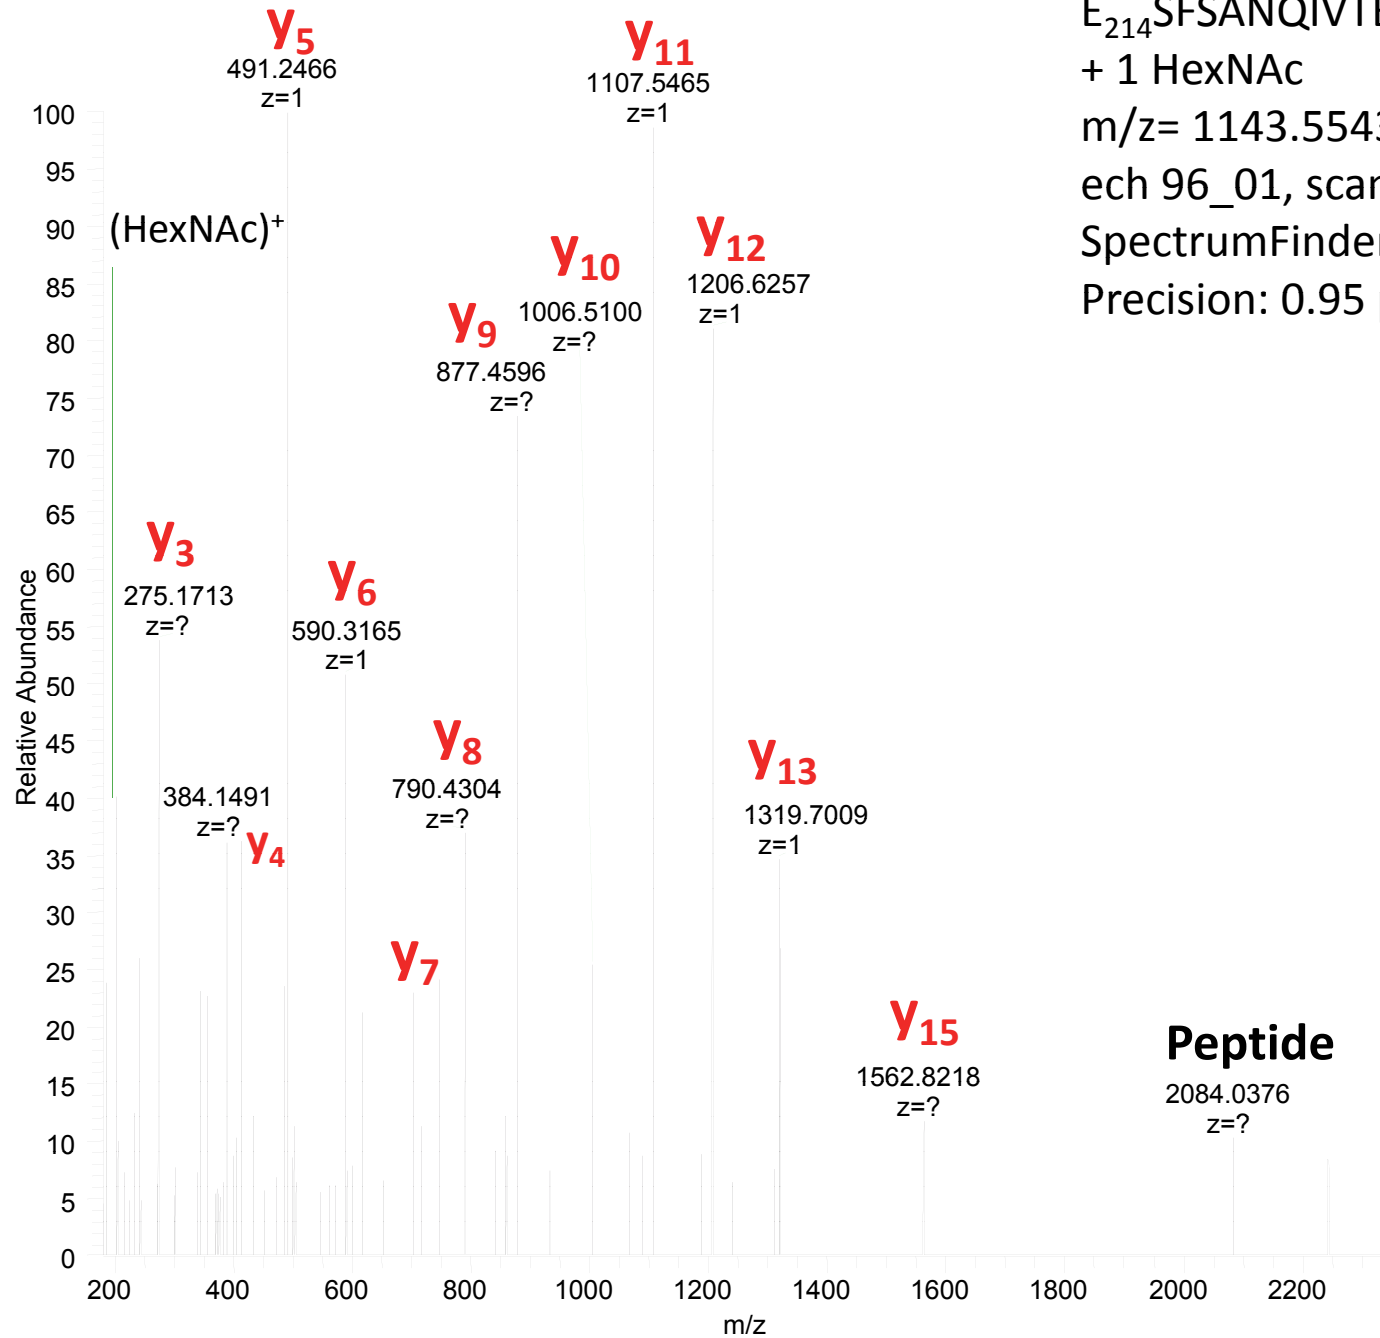

## Supplemental Figure 5t

E<sub>214</sub>SFSANQIVTESSLVTDAGK<sub>233</sub>

+ 1 O-AcHexNAc

m/z = 776.707 (+3)

ech 96\_01, scan 8433

SpectrumFinder score: 0.00E+00

Precision: -0.75 ppm

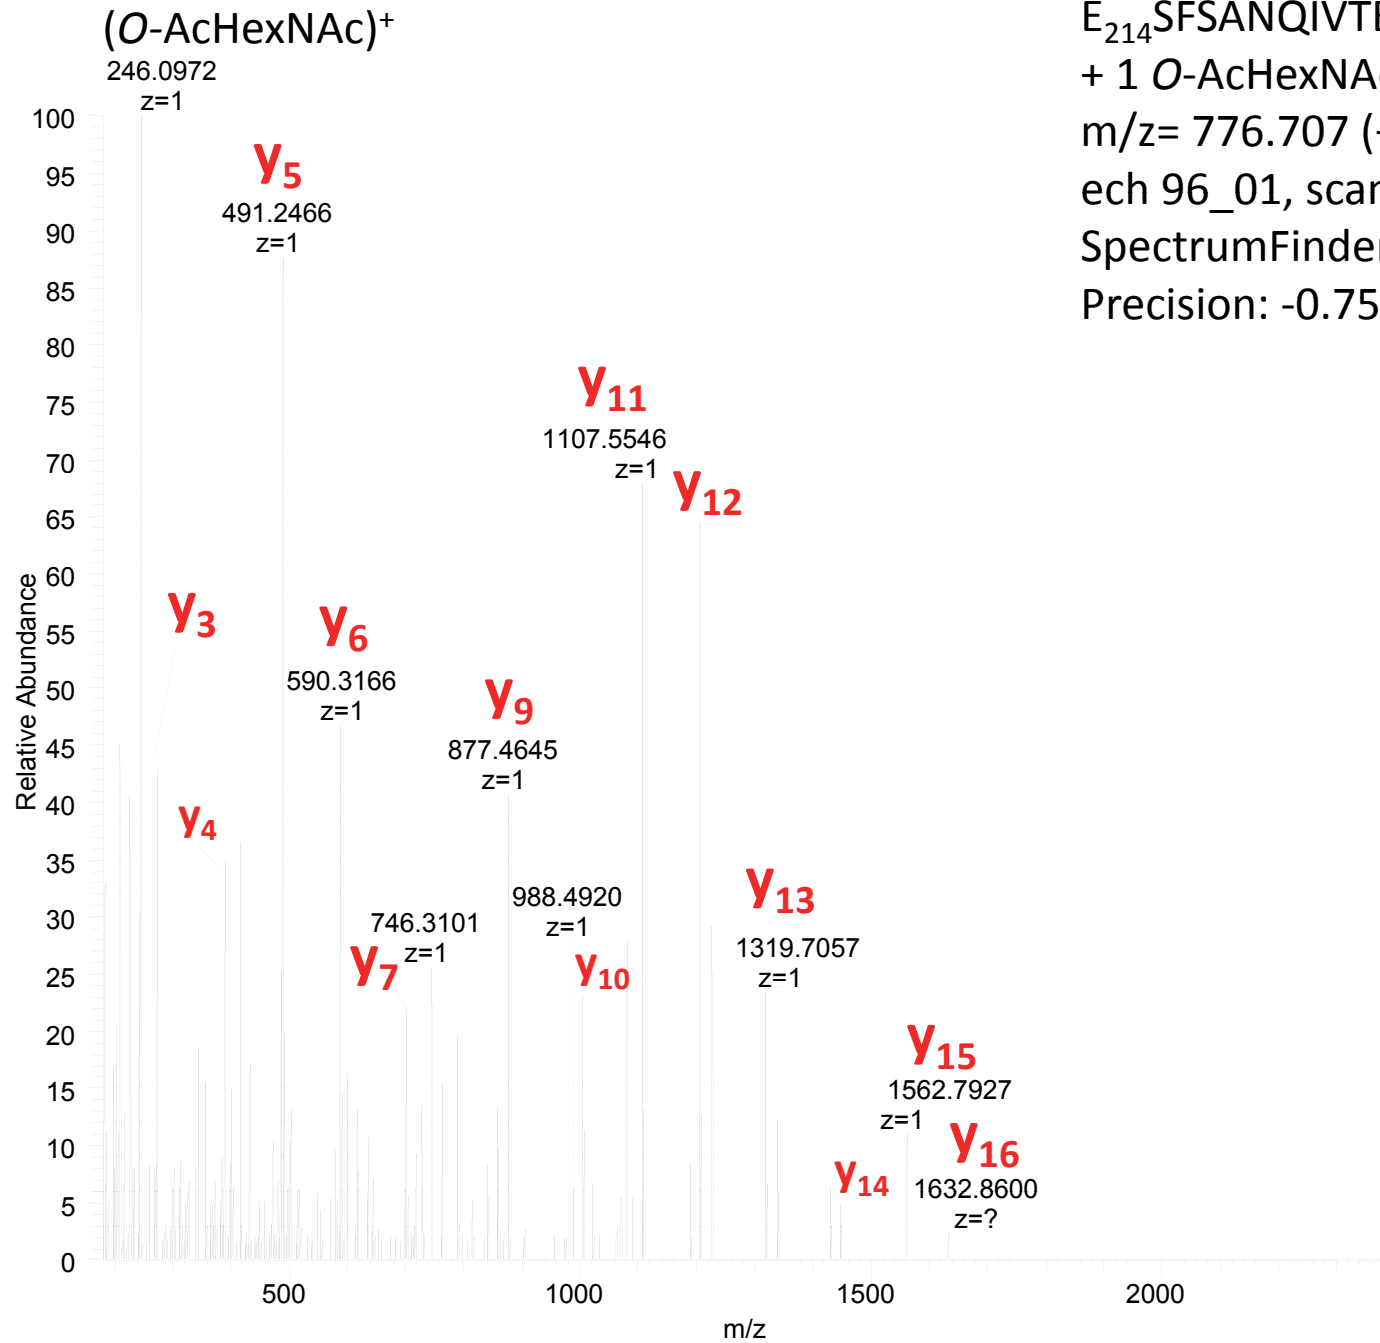

## Supplemental Figure 5u

E<sub>214</sub>SFSANQIVTESSLVTDAGK<sub>233</sub>

+ 2 HexNAc

m/z = 1245.0939 (+2)

ech 96\_01, scan 7636

SpectrumFinder score: 9.07E-05

Precision: 1.03 ppm

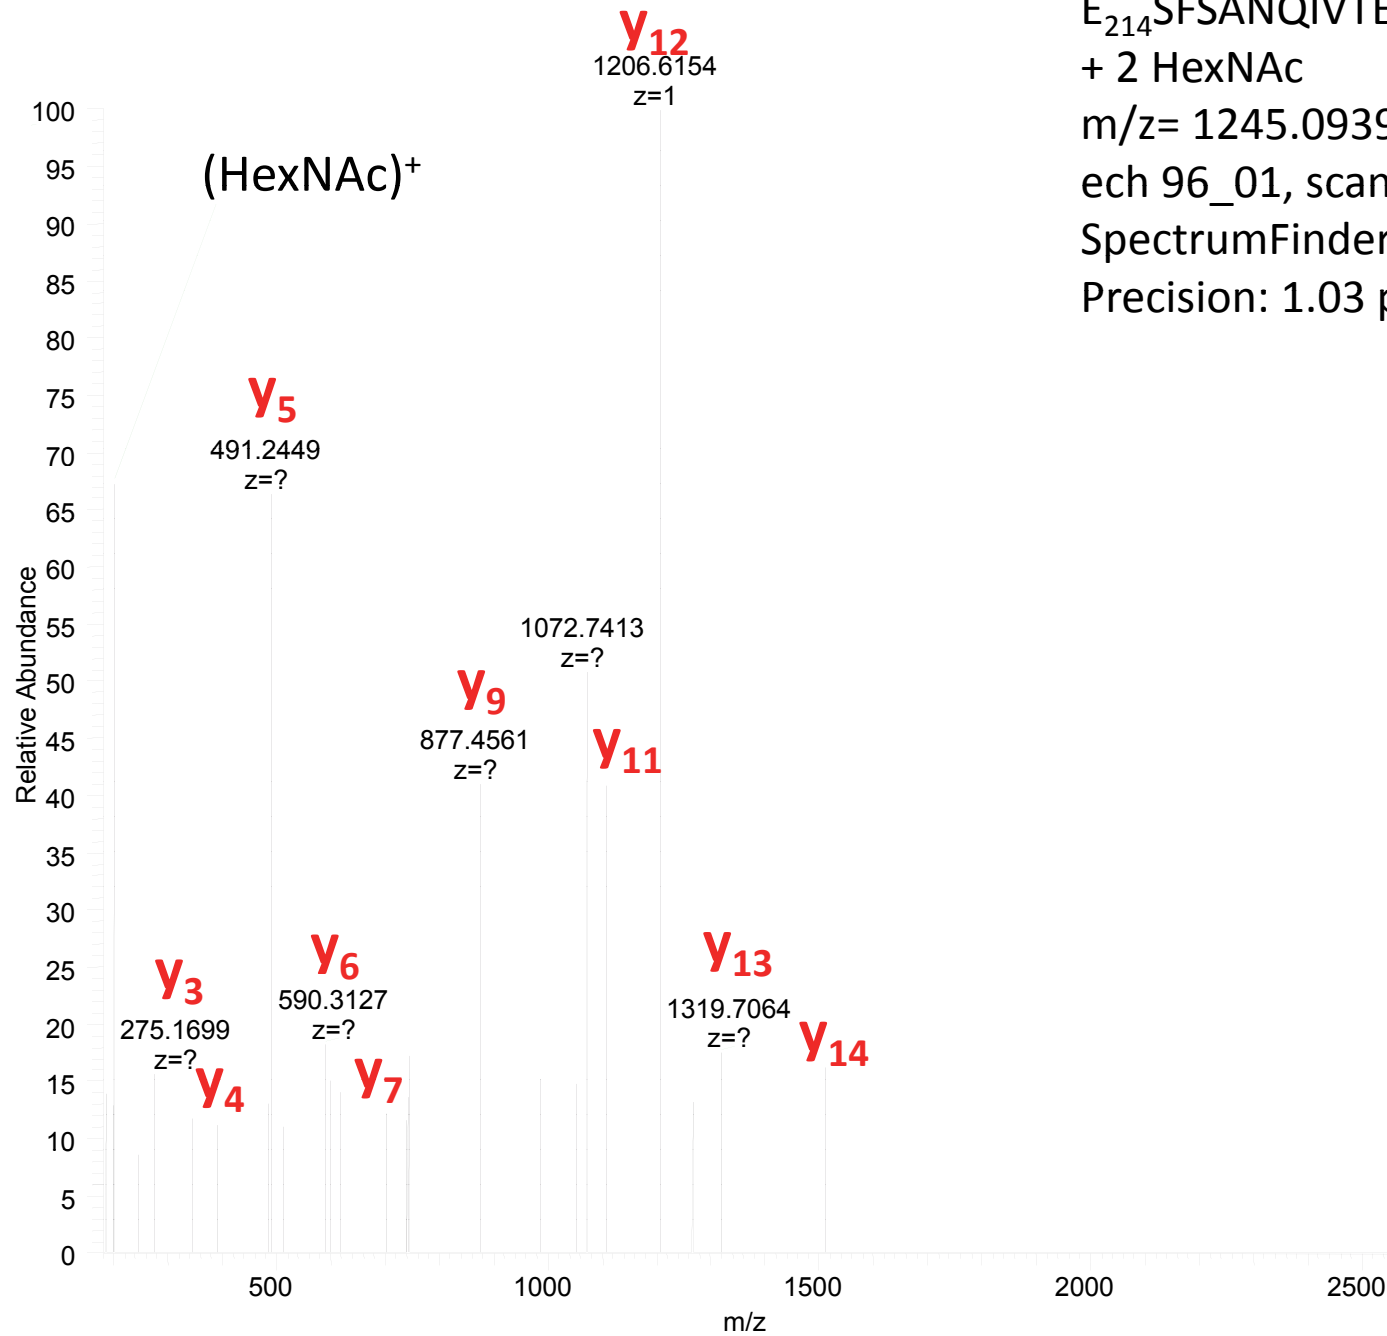

## Supplemental Figure 5v

E<sub>214</sub>SFSANQIVTESSLVTDAGK<sub>233</sub>

+ 1 O-AcHexNAc + 1 HexNAc

m/z = 844.3998 (+3)

ech 96\_01, scan 7926

SpectrumFinder score: 1.21E-07

Precision: -0.68 ppm

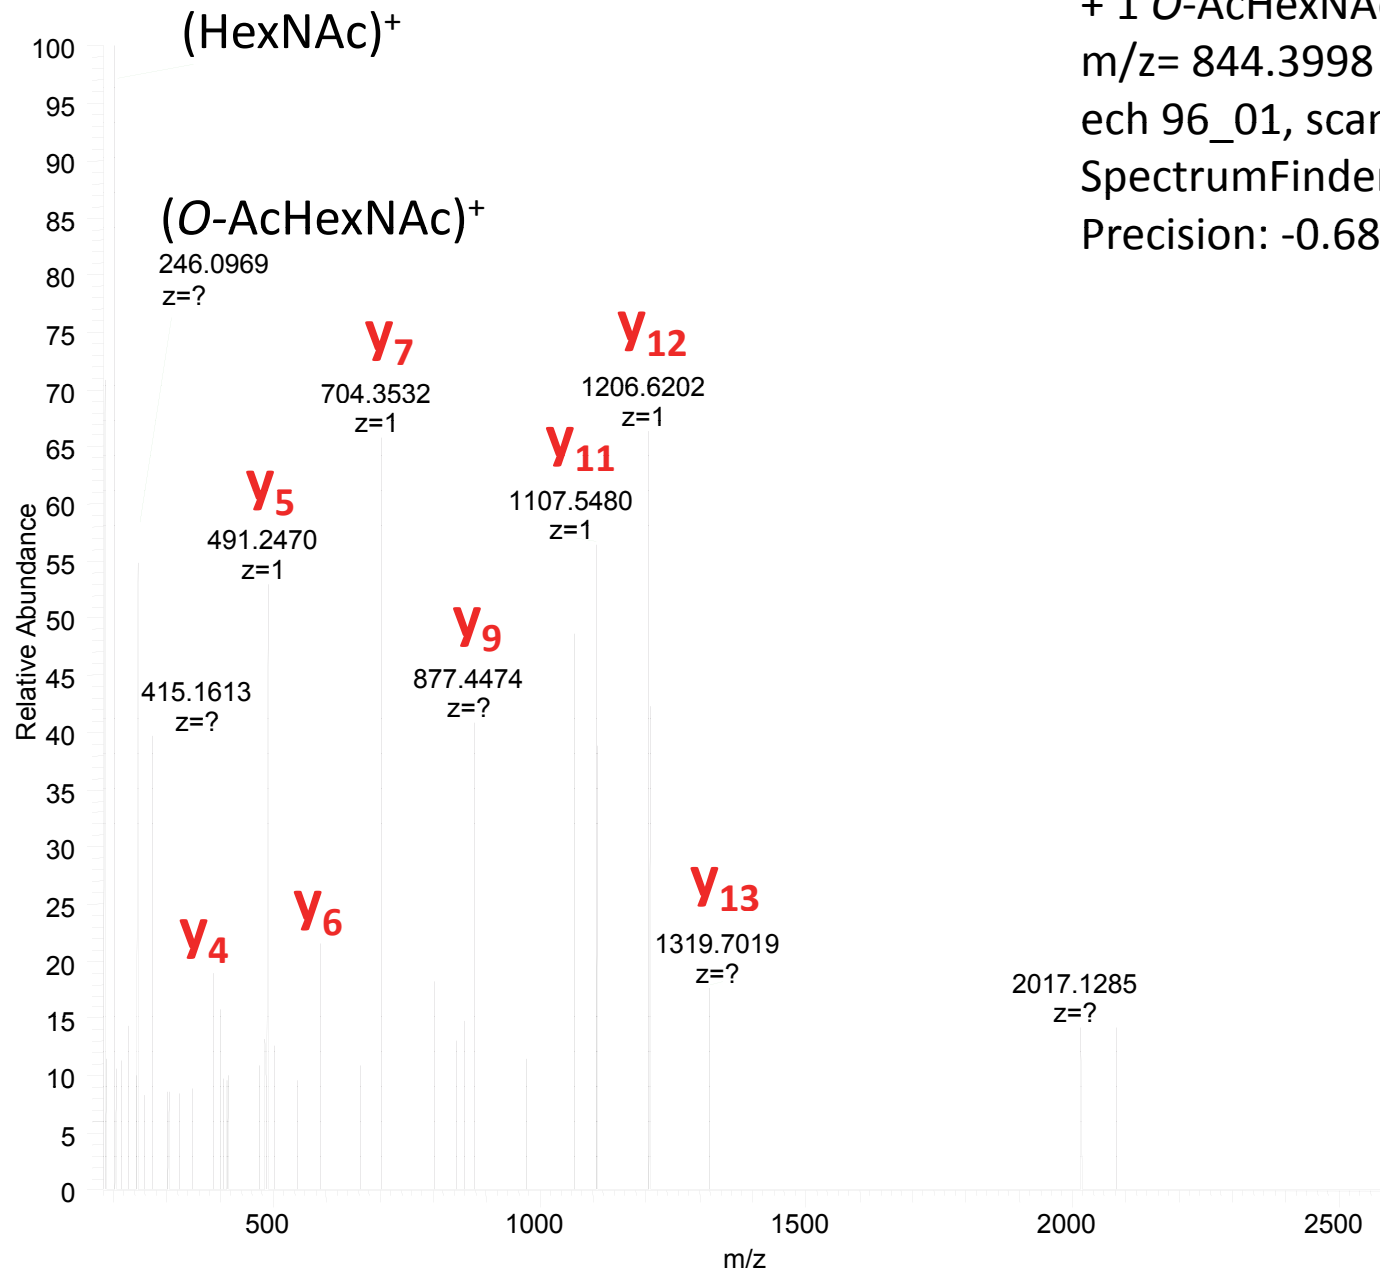

## Supplemental Figure 5w

N<sub>234</sub>ASVSSLIEITKPK<sub>247</sub>

SpectrumFinder reference

m/z= 743.9276 (+2)

ech 96\_01, scan 7059

SpectrumFinder score: 6.66E-16

Precision: -1.17 ppm

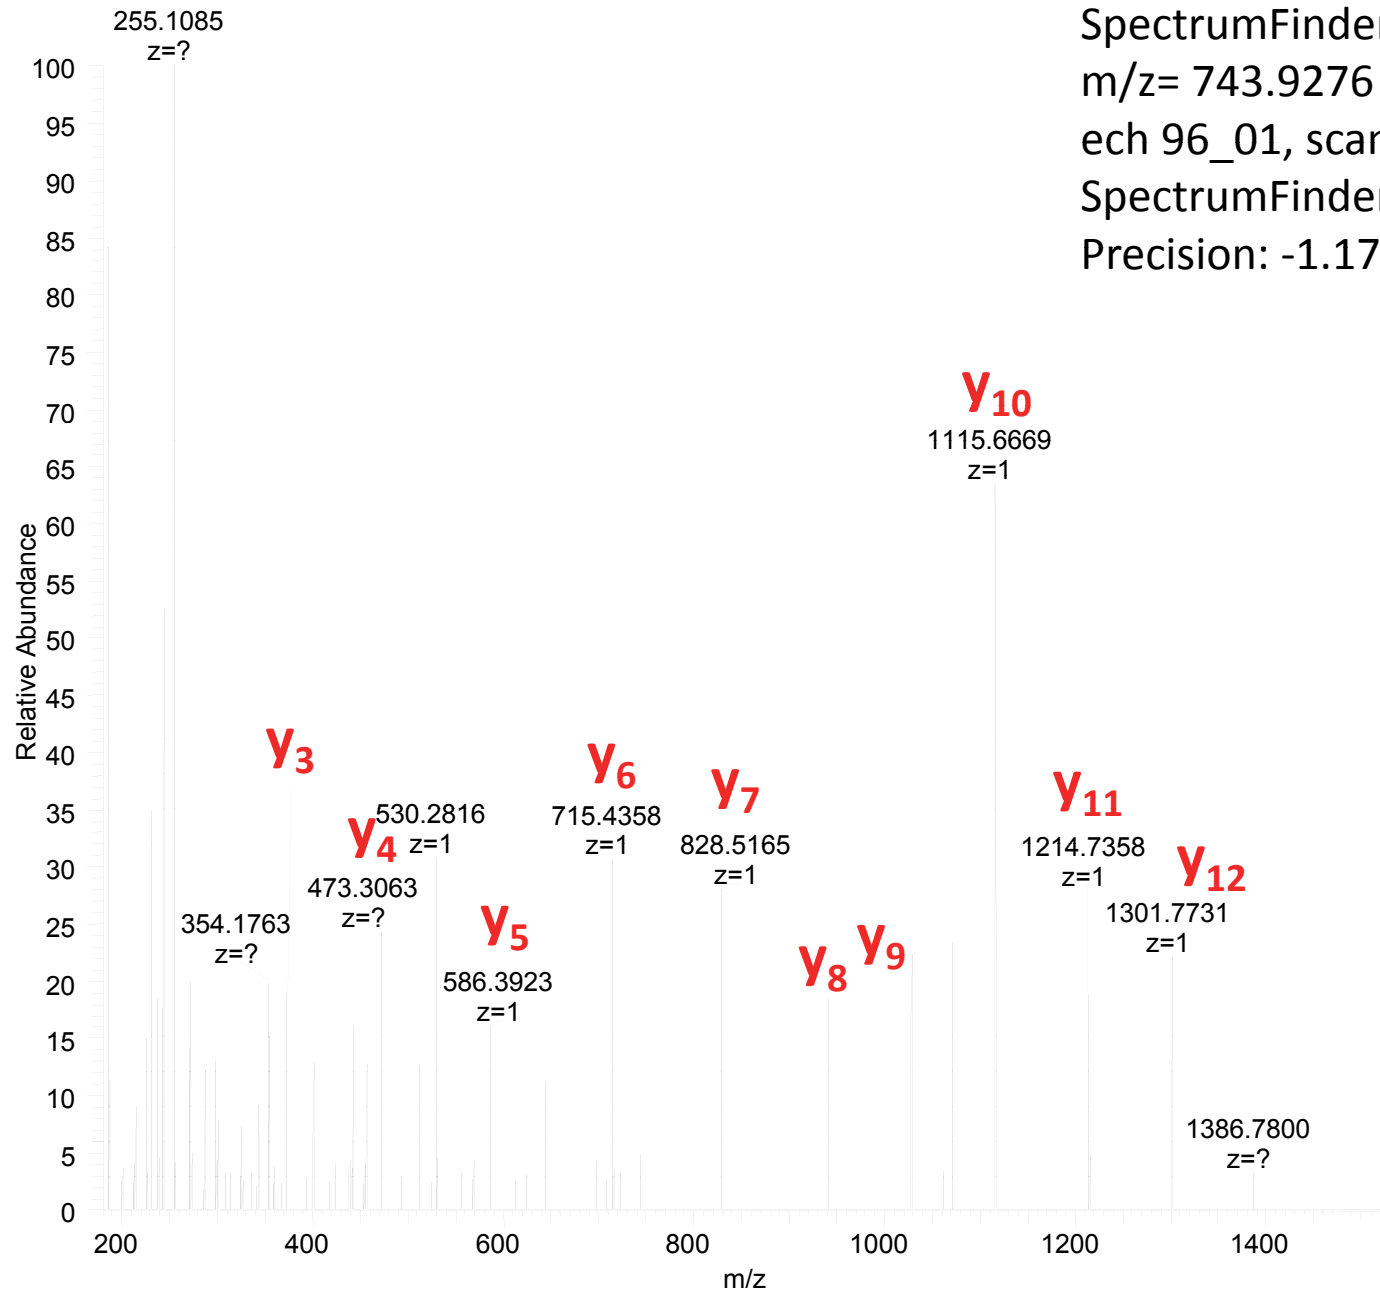



# Supplemental Figure 5x

**Peptide**  
1486.8503  
z=1

N<sub>234</sub>ASVSSLIEITKPK<sub>247</sub>

+ 1 HexNAc

m/z= 845.4673 (+2)

ech 96\_01, scan 6994

SpectrumFinder score: 1.11E-16

Precision: 0.12 ppm

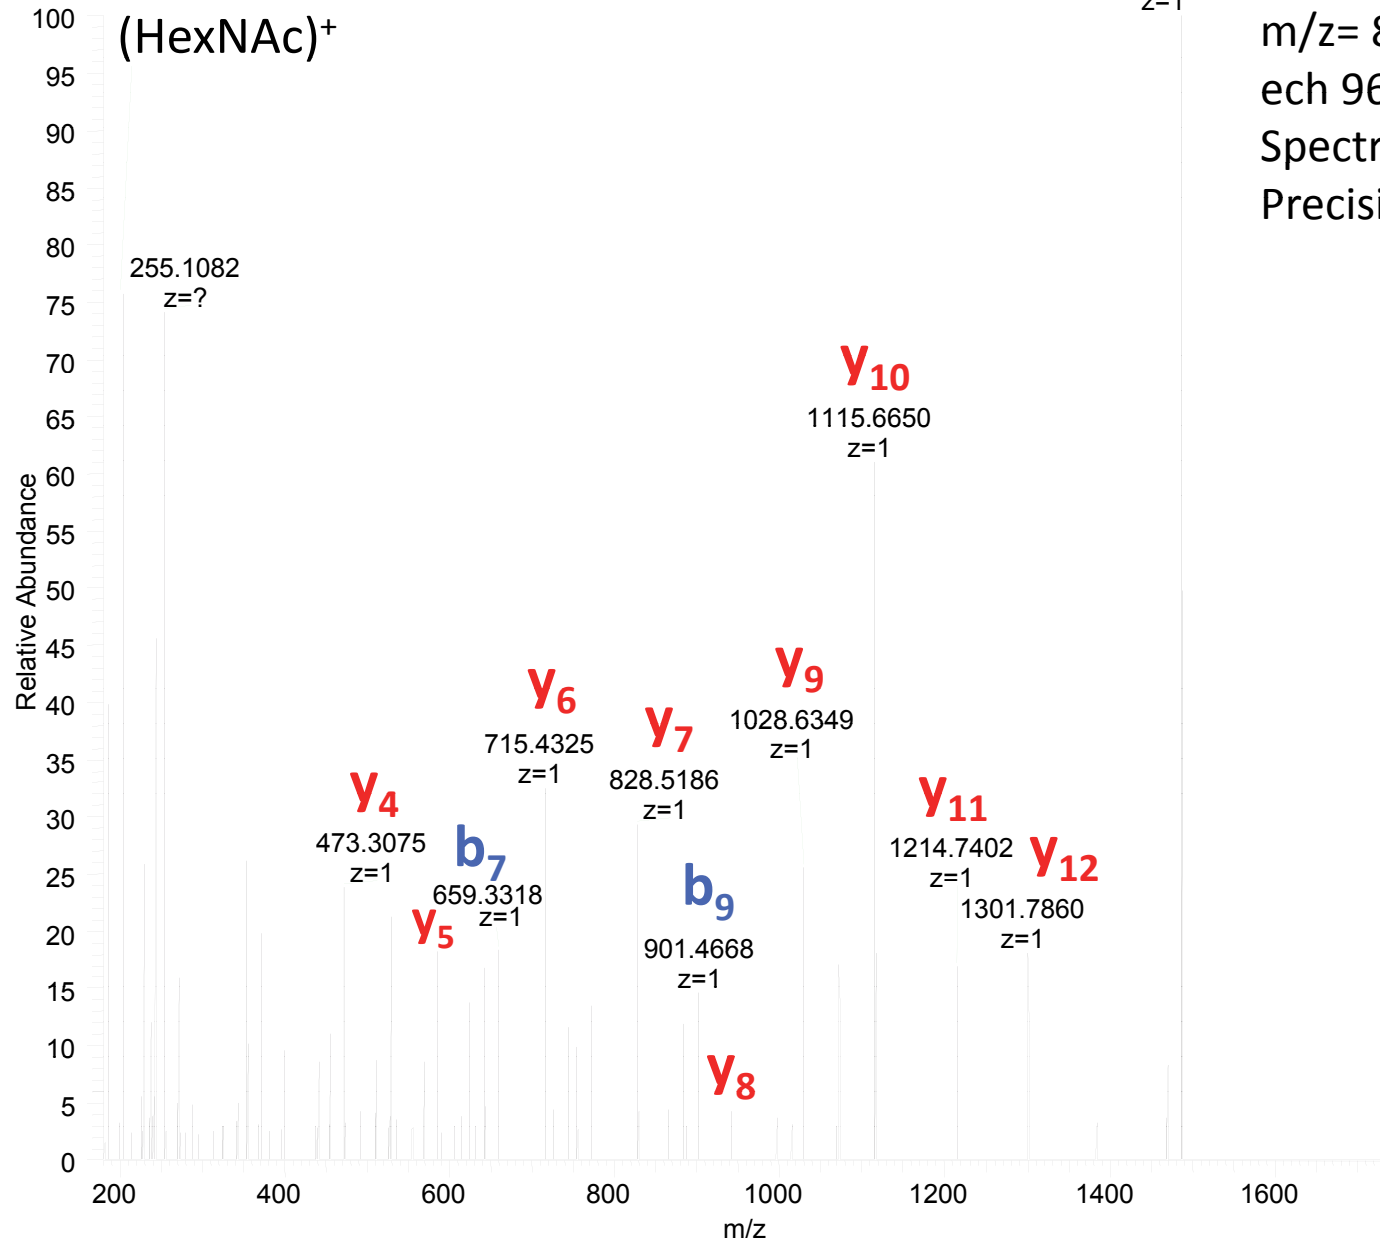

## Supplemental Figure 5y

N<sub>234</sub>ASVSSLIEITKPK<sub>247</sub>

+ 2 HexNAc

m/z= 947.0071 (+2)

ech 96\_01, scan 6074

SpectrumFinder score: 6.71E-04

Precision: 0.11 ppm

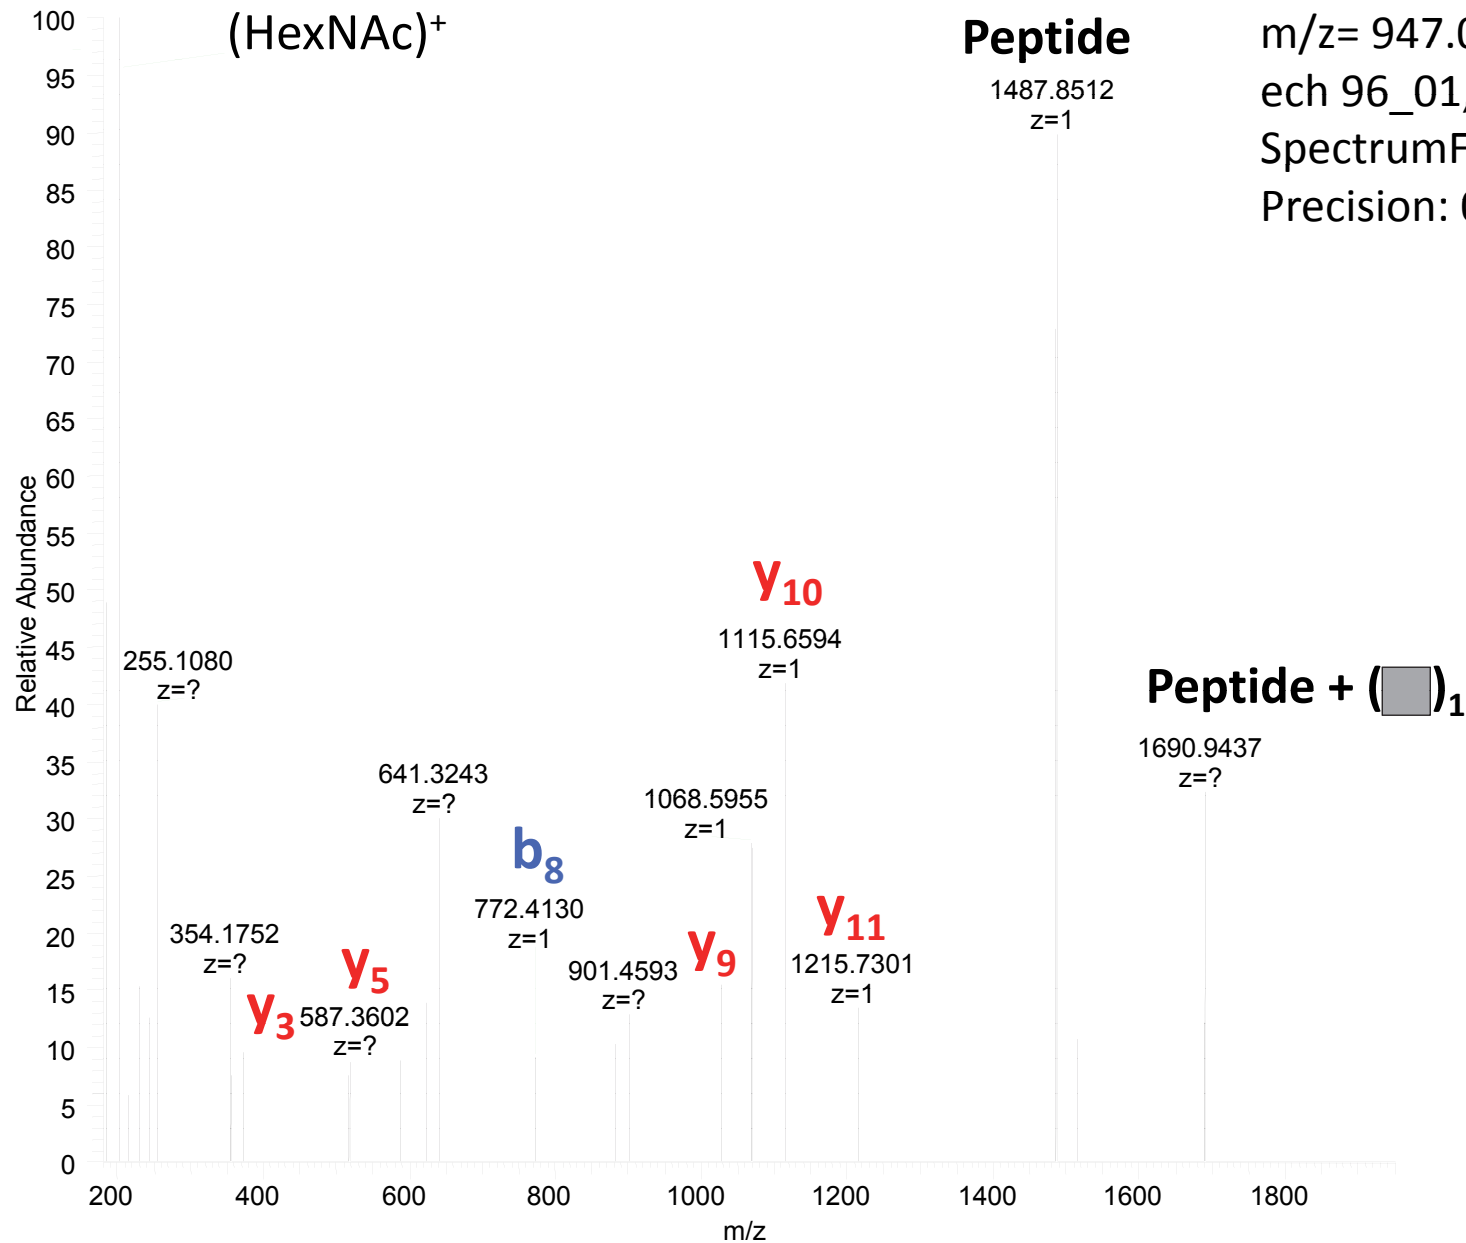

## Supplemental Figure 5z

M<sub>255</sub>SNESLITPEK<sub>265</sub>

SpectrumFinder reference

m/z= 624.8124 (+2)

ech 96, scan 5316

SpectrumFinder score: 0.00E+00

Precision: 1.89 ppm

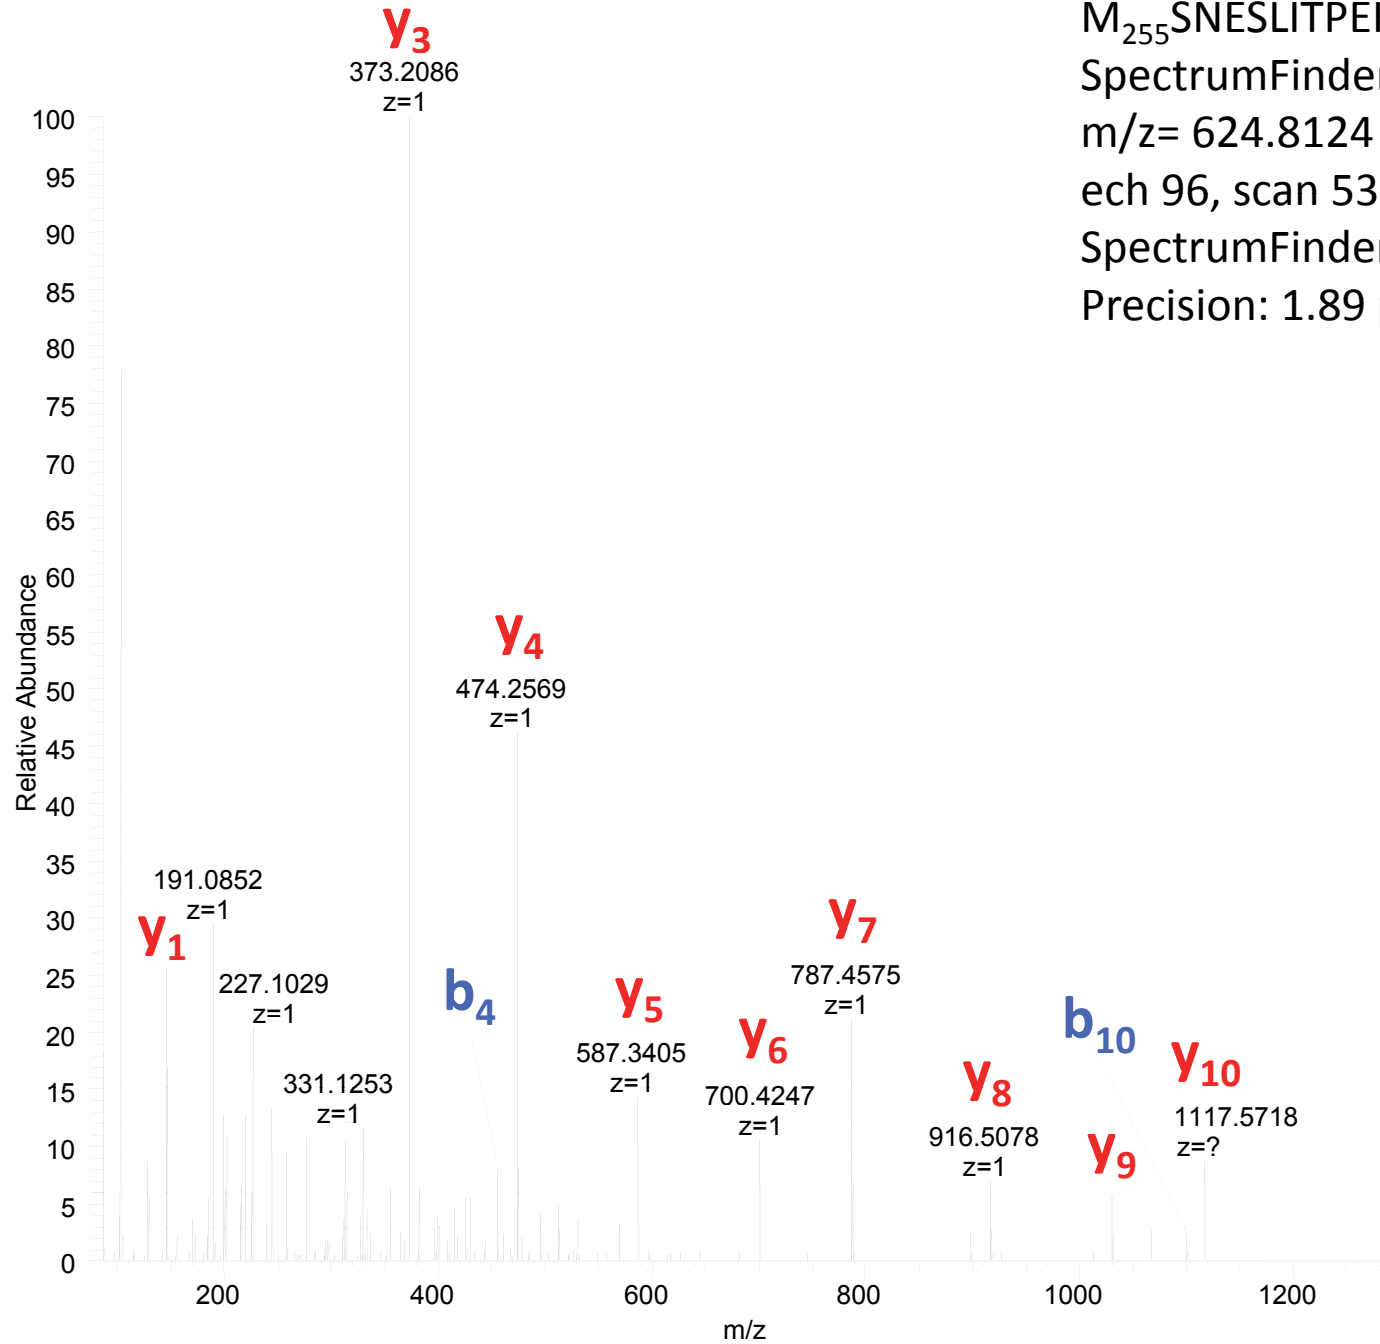

## Supplemental Figure 5aa

M<sub>255</sub>SNESLITPEK<sub>265</sub>

+ 1 HexNAc + Oxid. Methionine

m/z = 734.3477 (+2)

ech 96, scan 4524

SpectrumFinder score: 5.71E-09

Precision: -0.90 ppm

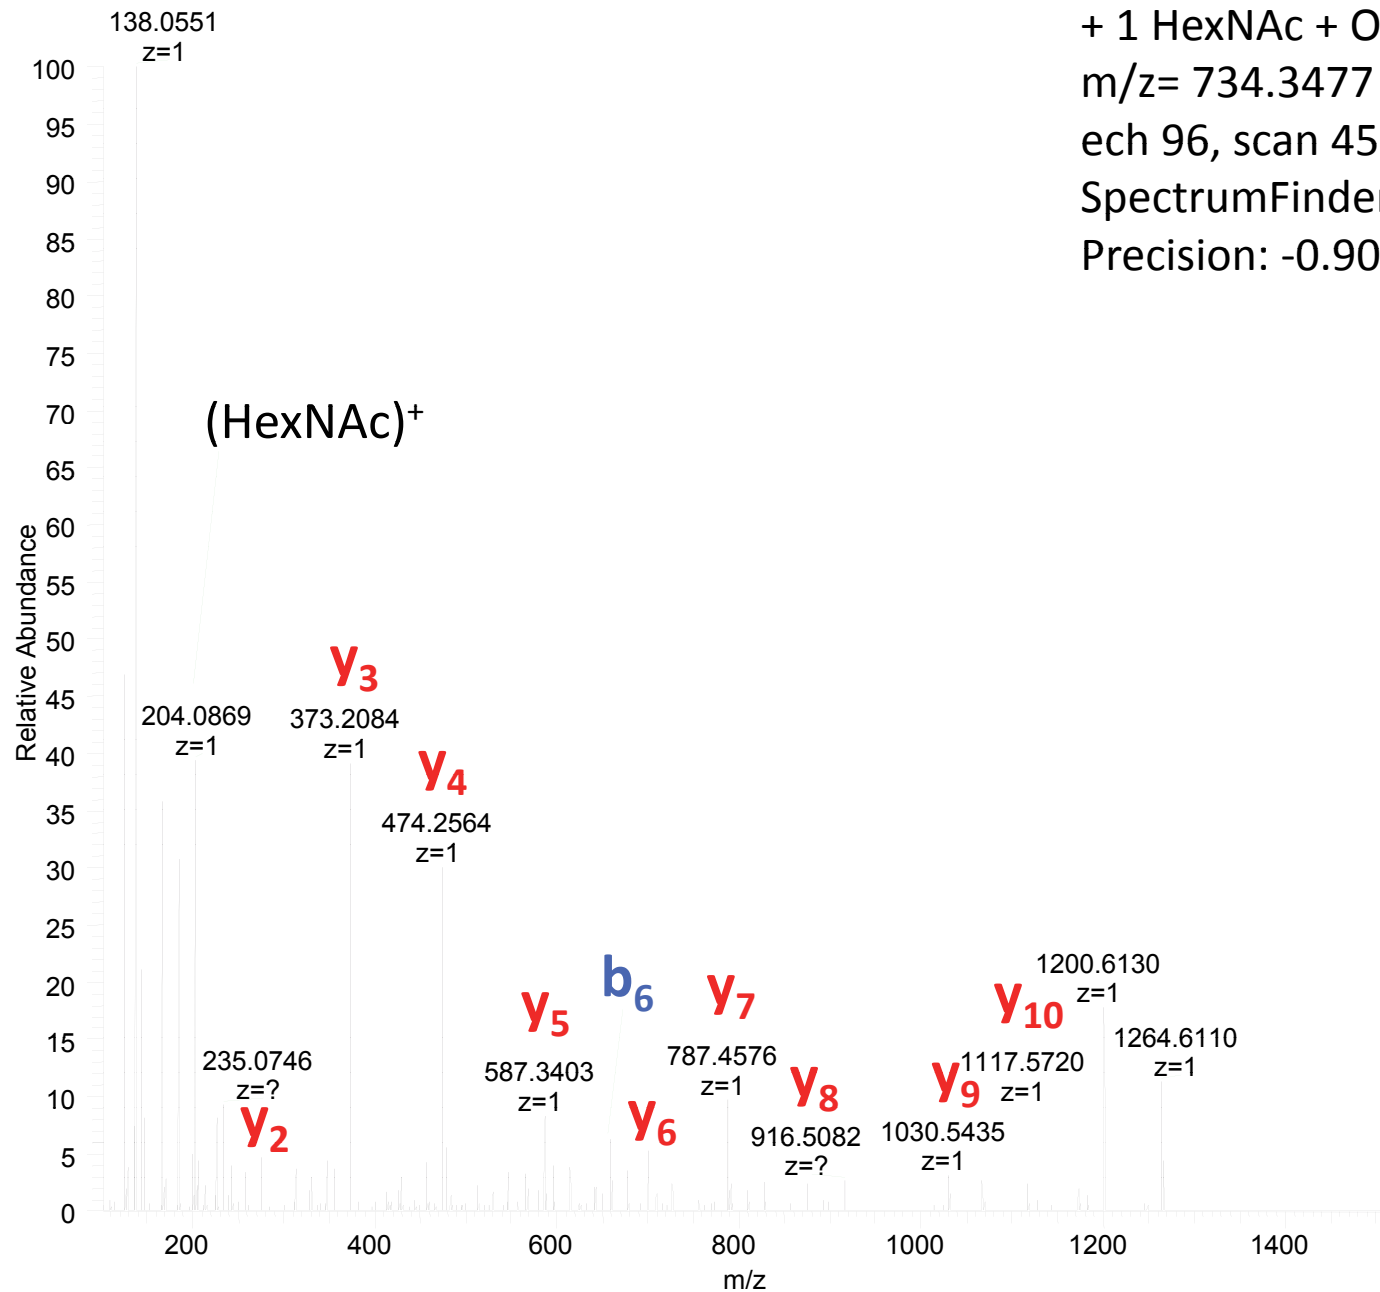

## Supplemental Figure 5ab

S<sub>266</sub>QVMIASDKTGNESLTPTIR<sub>285</sub>

SpectrumFinder reference

m/z= 716.704 (+3)

ech 96, scan 5122

SpectrumFinder score: 3.33E-16

Precision: -0.35 ppm

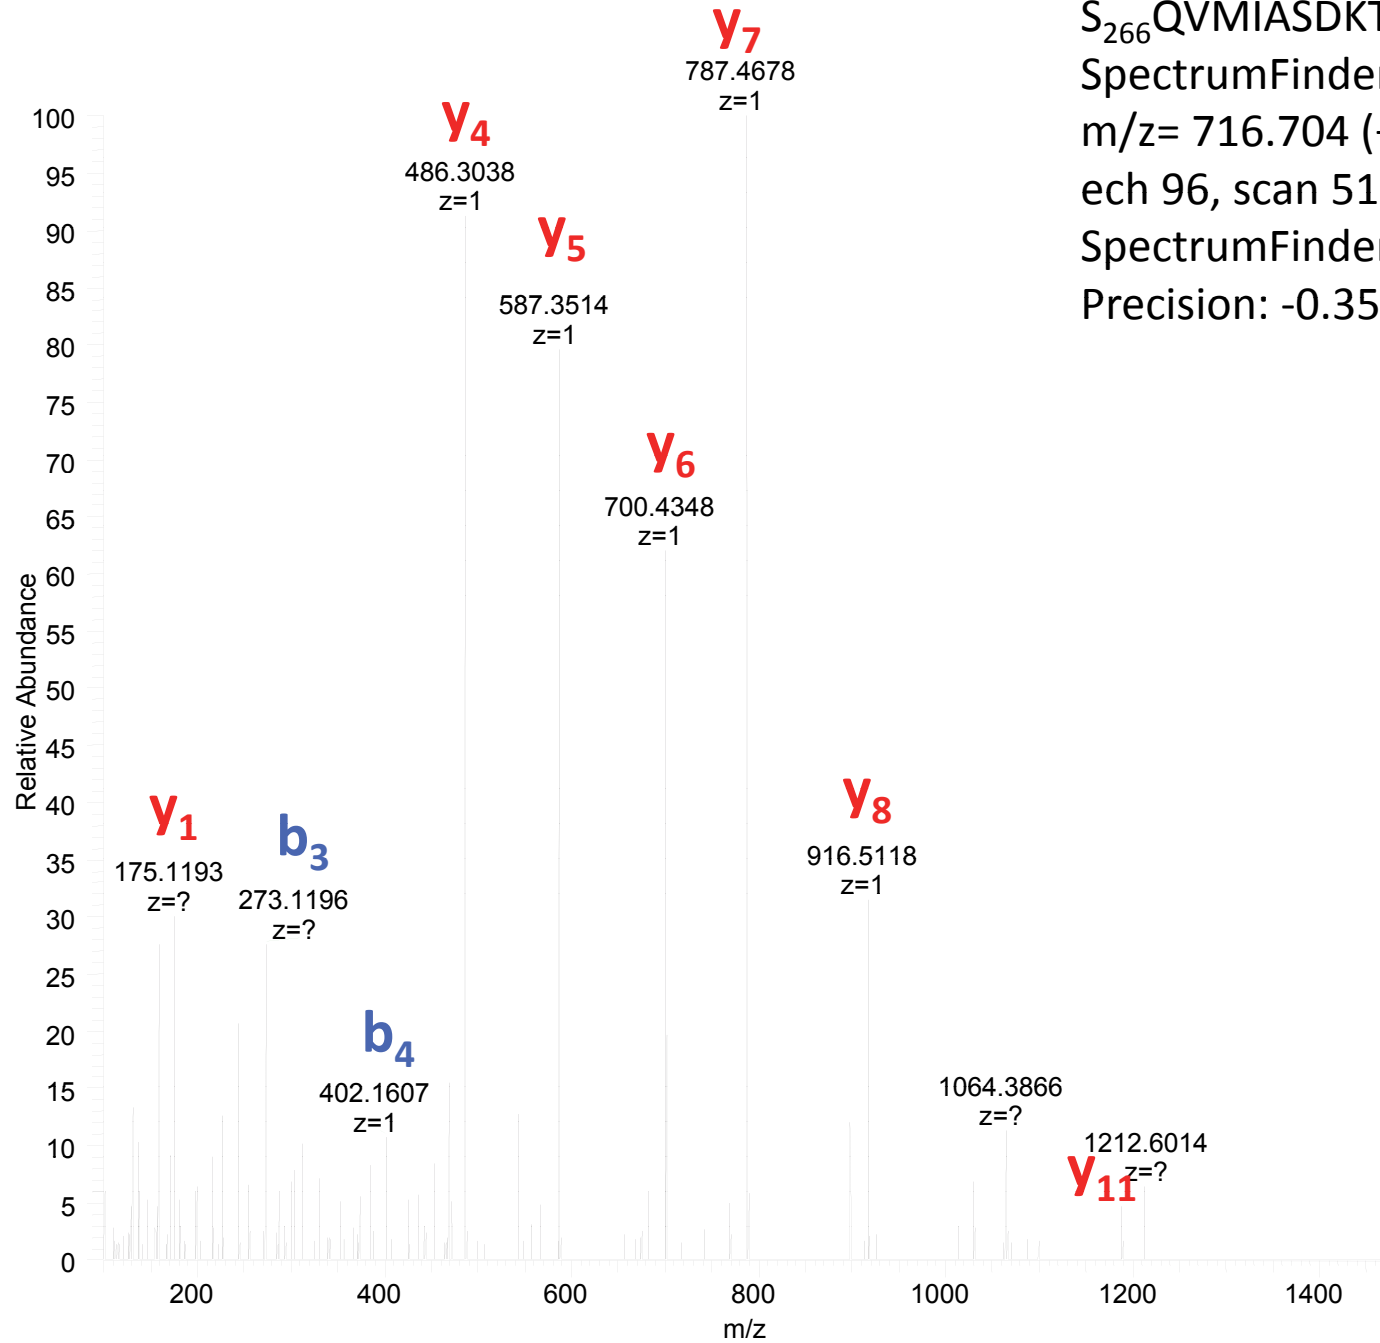

# Supplemental Figure 5ac

T<sub>275</sub>GNESLTPTIR<sub>285</sub>

+ 1 HexNAc

m/z= 696.3559 (+2)

ech 96, scan 4797

SpectrumFinder score: 2.01E-07

Precision: 1.53 ppm

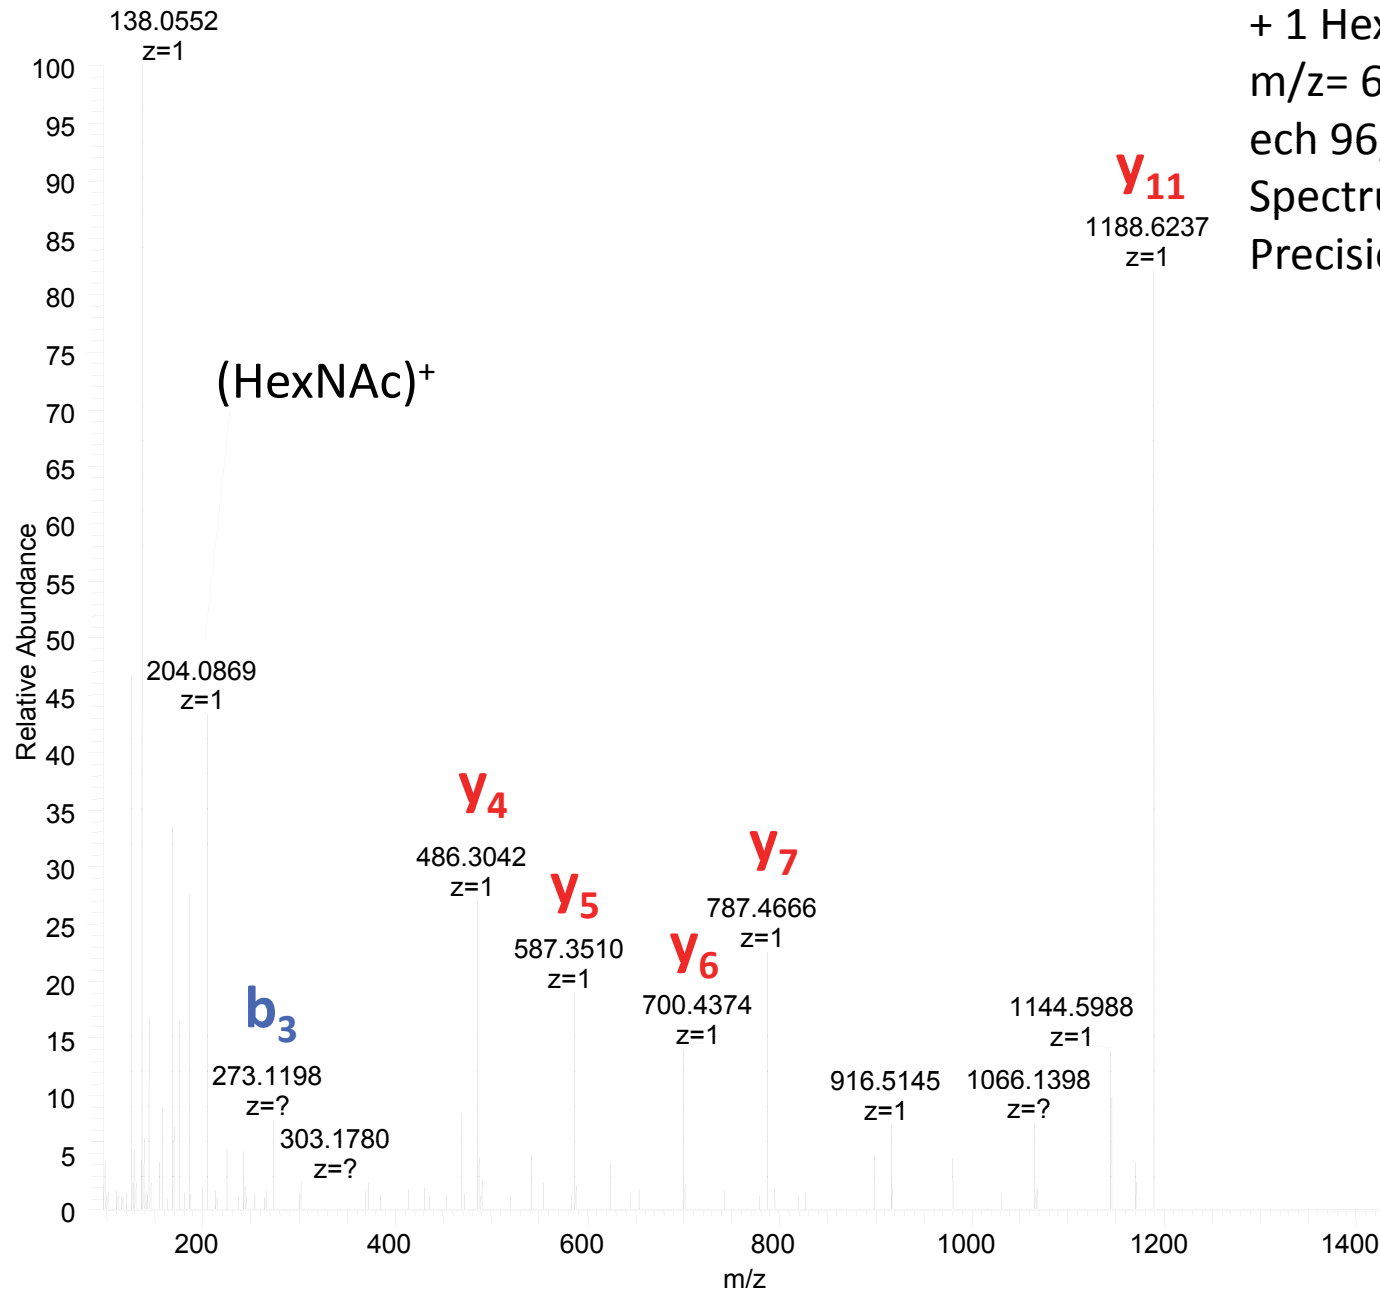

# Supplemental Figure 5ad

T<sub>275</sub>GNESLTPTIR<sub>285</sub>

+ 1 O-AcHexNAc

m/z= 717.359 (+2)

ech 96, scan 5481

SpectrumFinder score: 0.00E+00

Precision: 0.00 ppm

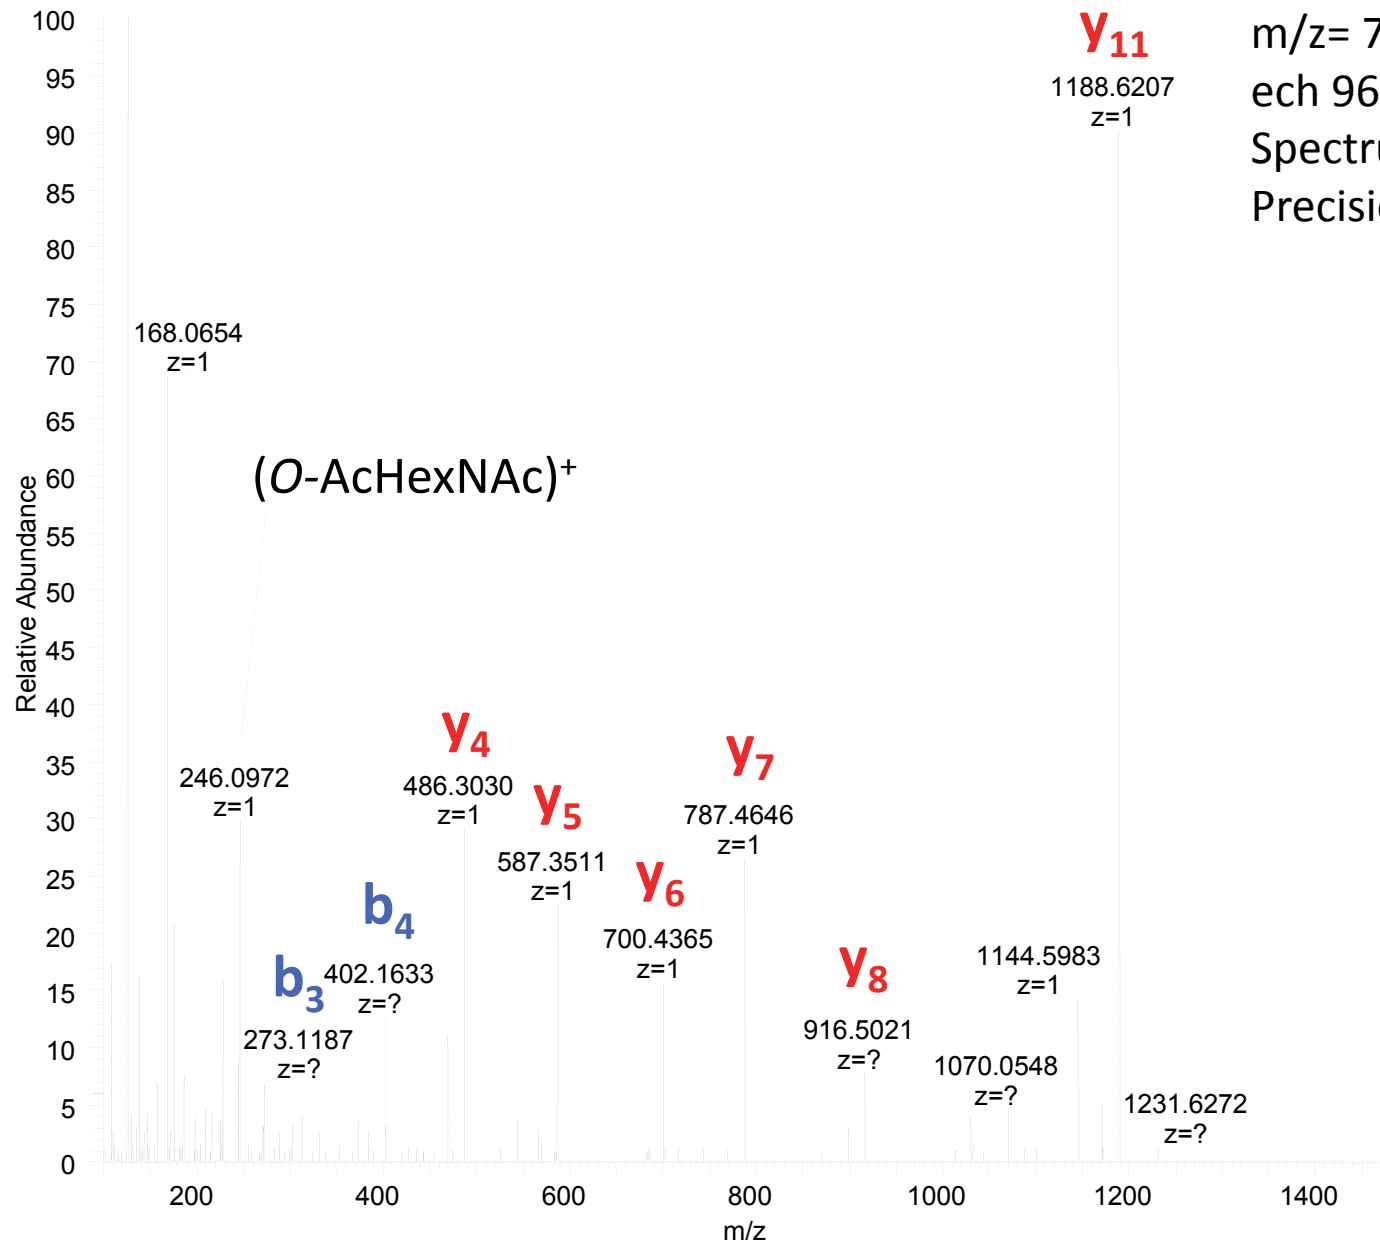

## Supplemental Figure 5ae

T<sub>447</sub>ATLNNQVASIEER<sub>464</sub>

SpectrumFinder reference

m/z= 773.3971 (+2)

ech 96\_01, scan 5875

SpectrumFinder score: 4.20E-05

Precision: -0.60 ppm

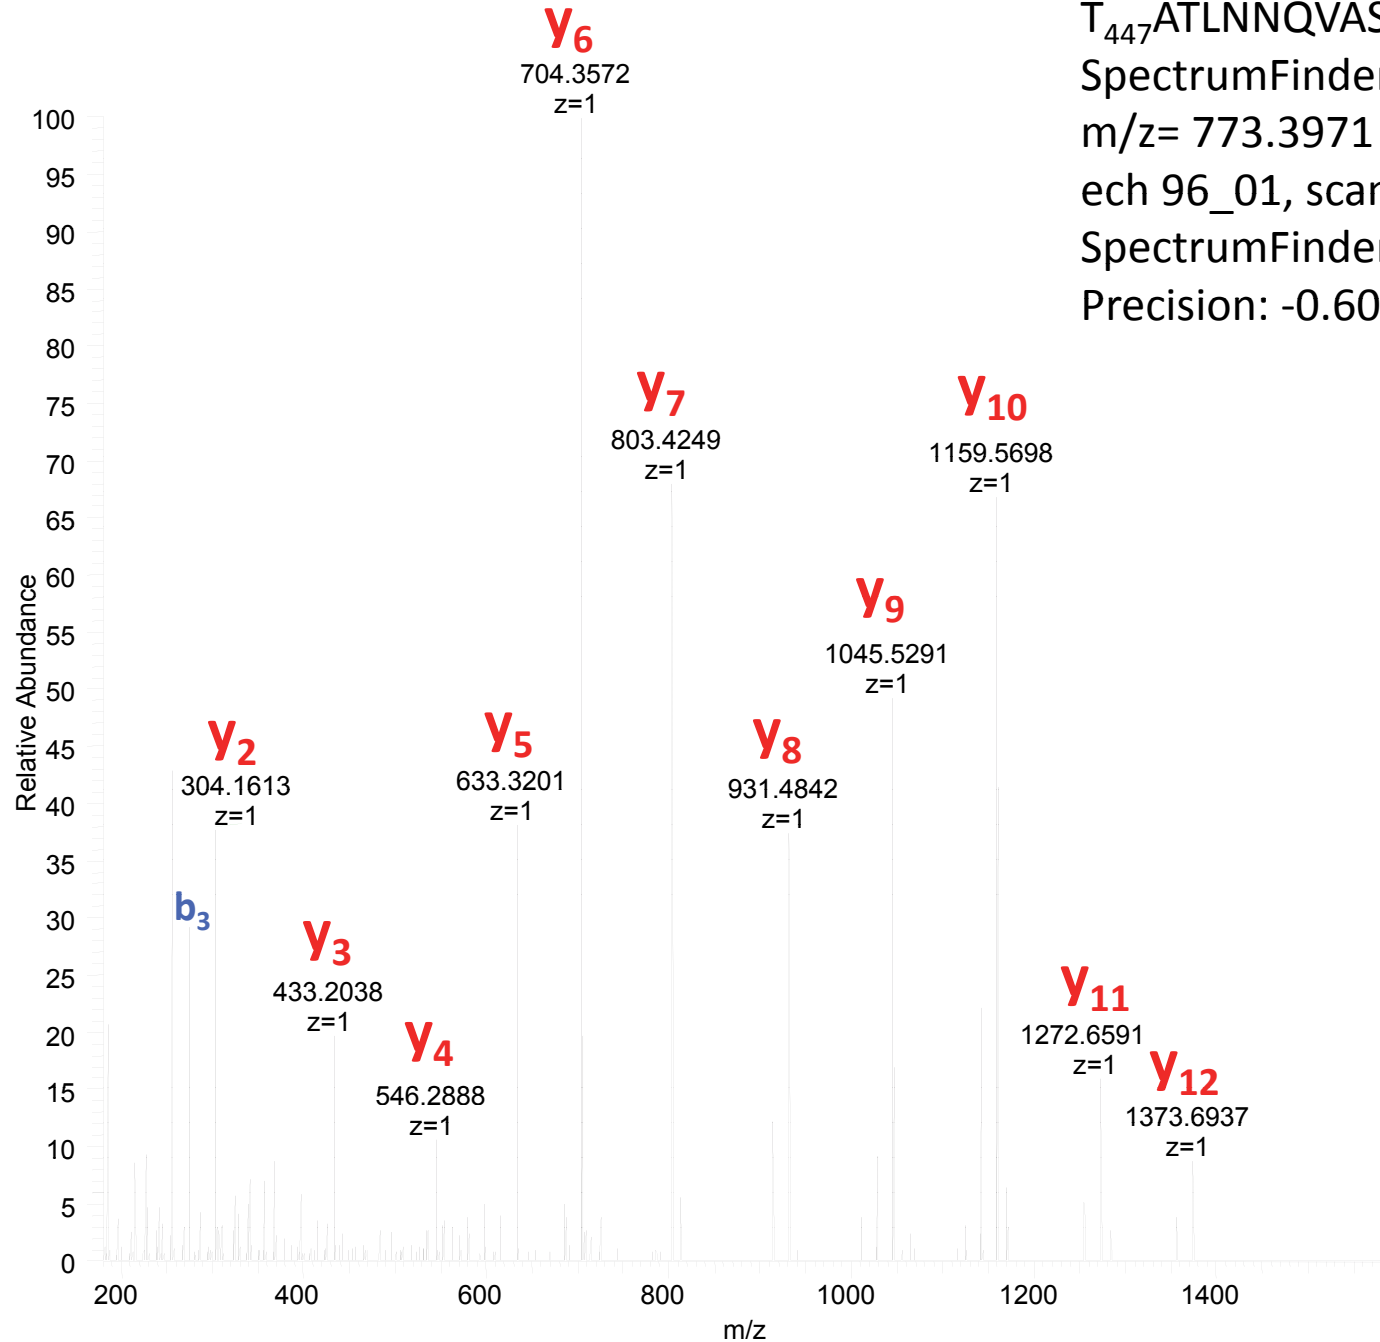



## Supplemental Figure 5af

T<sub>447</sub>ATLNNQVASIEER<sub>464</sub>

+ 1 O-AcHexNAc + 1 HexNAc

m/z = 665.6585 (+3)

ech 96\_01, scan 8034

SpectrumFinder score: 7.77E-03

Precision: -2.30 ppm

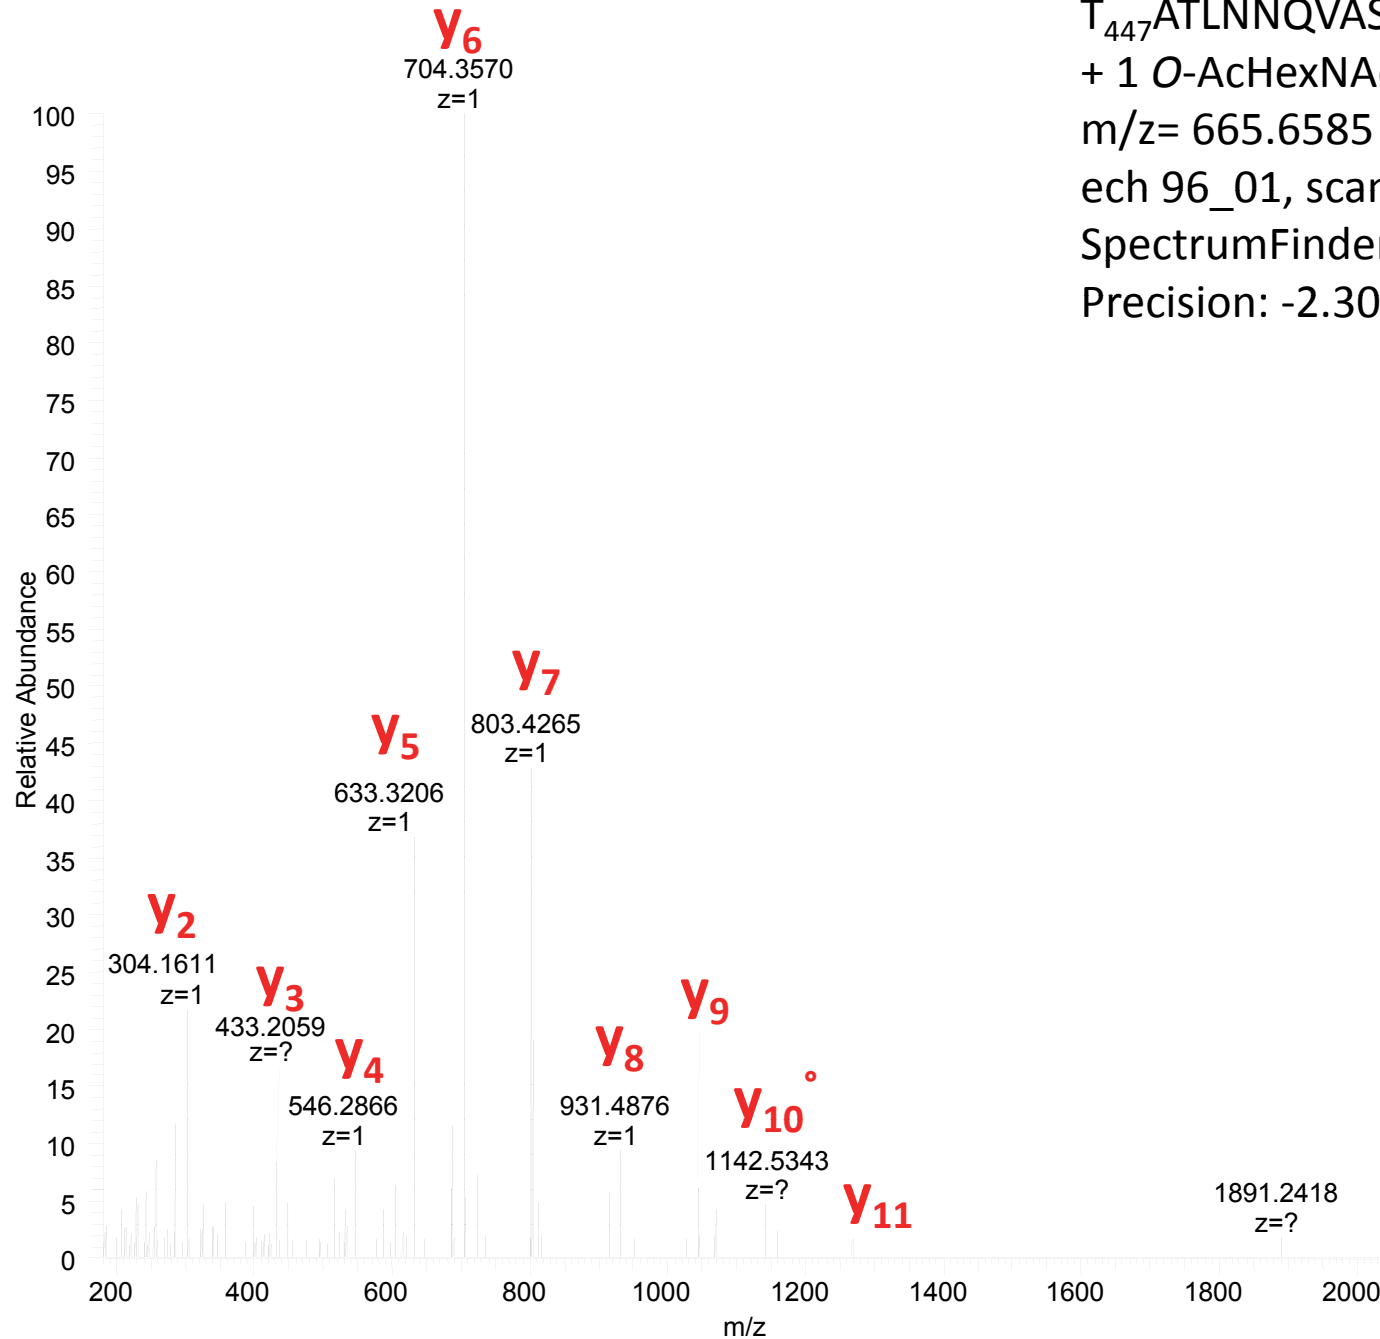

## Supplemental Figure 5ag

T<sub>447</sub>ATLNNQVASIEER<sub>464</sub>

+ 2 O-AcHexNAc

m/z= 679.6598 (+3)

ech 96\_01, scan 8518

SpectrumFinder score: 2.77E-03

Precision: -5.53 ppm

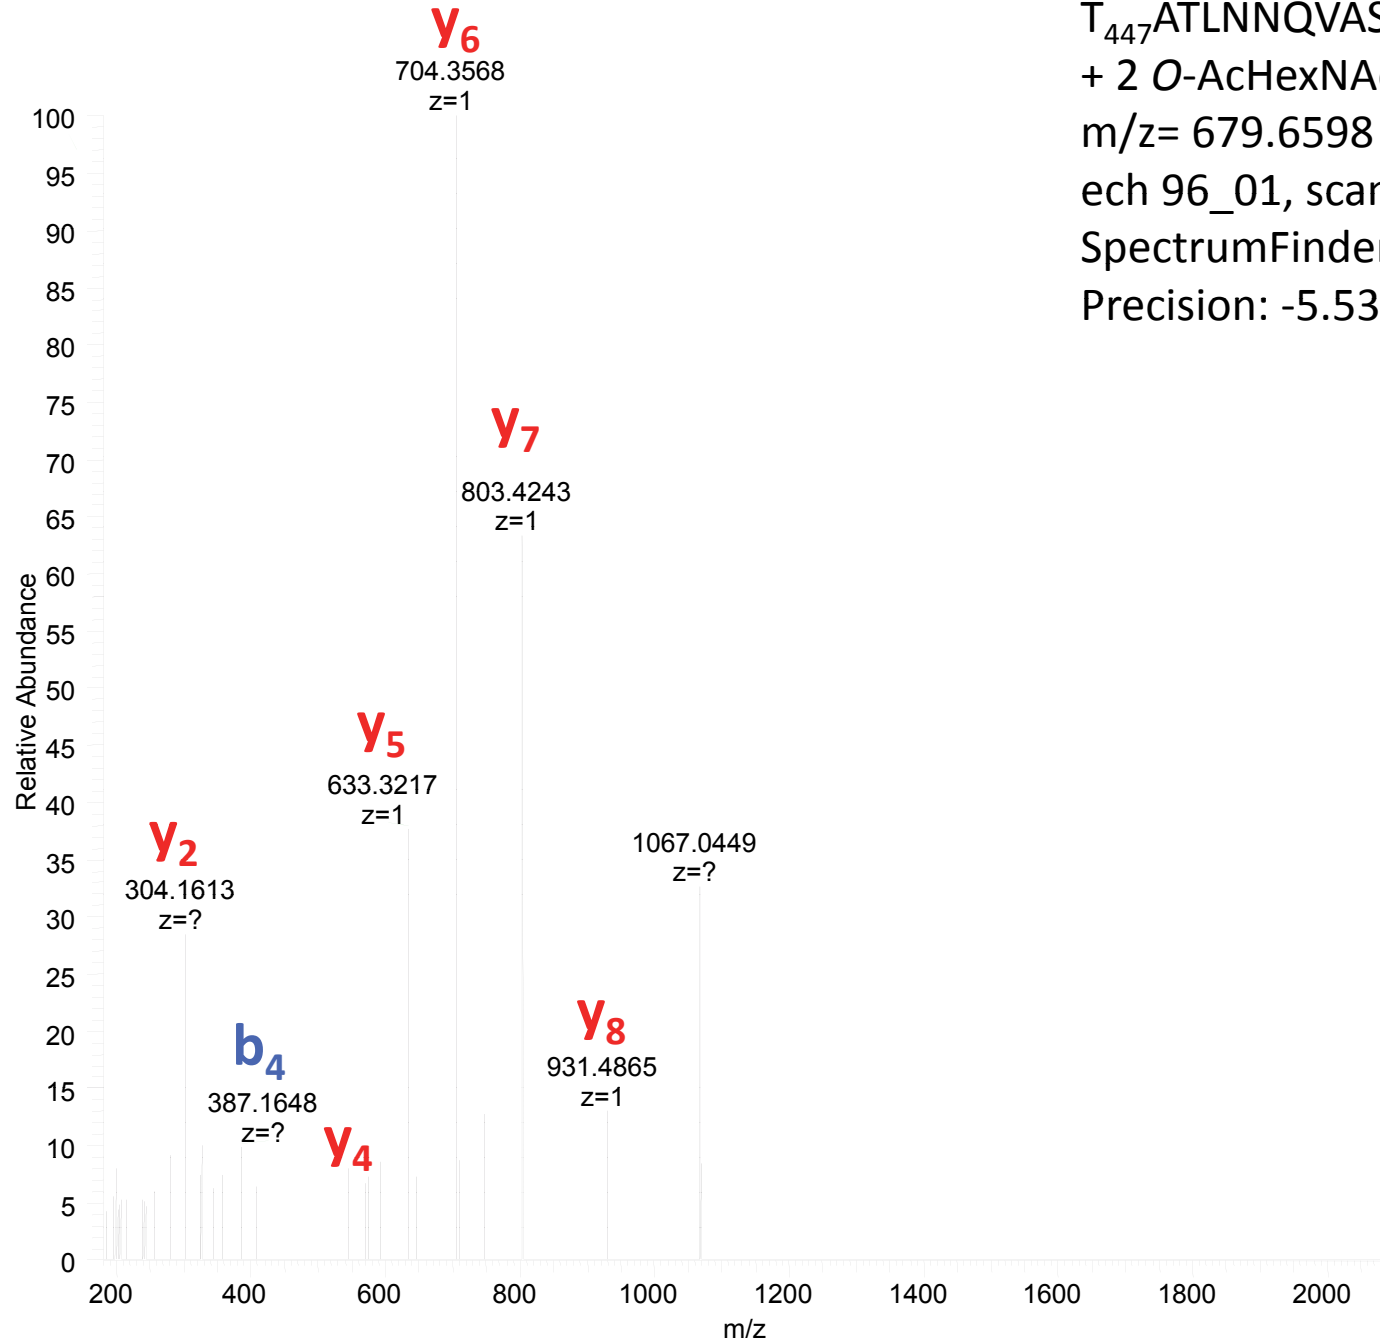

# Supplemental Figure 6

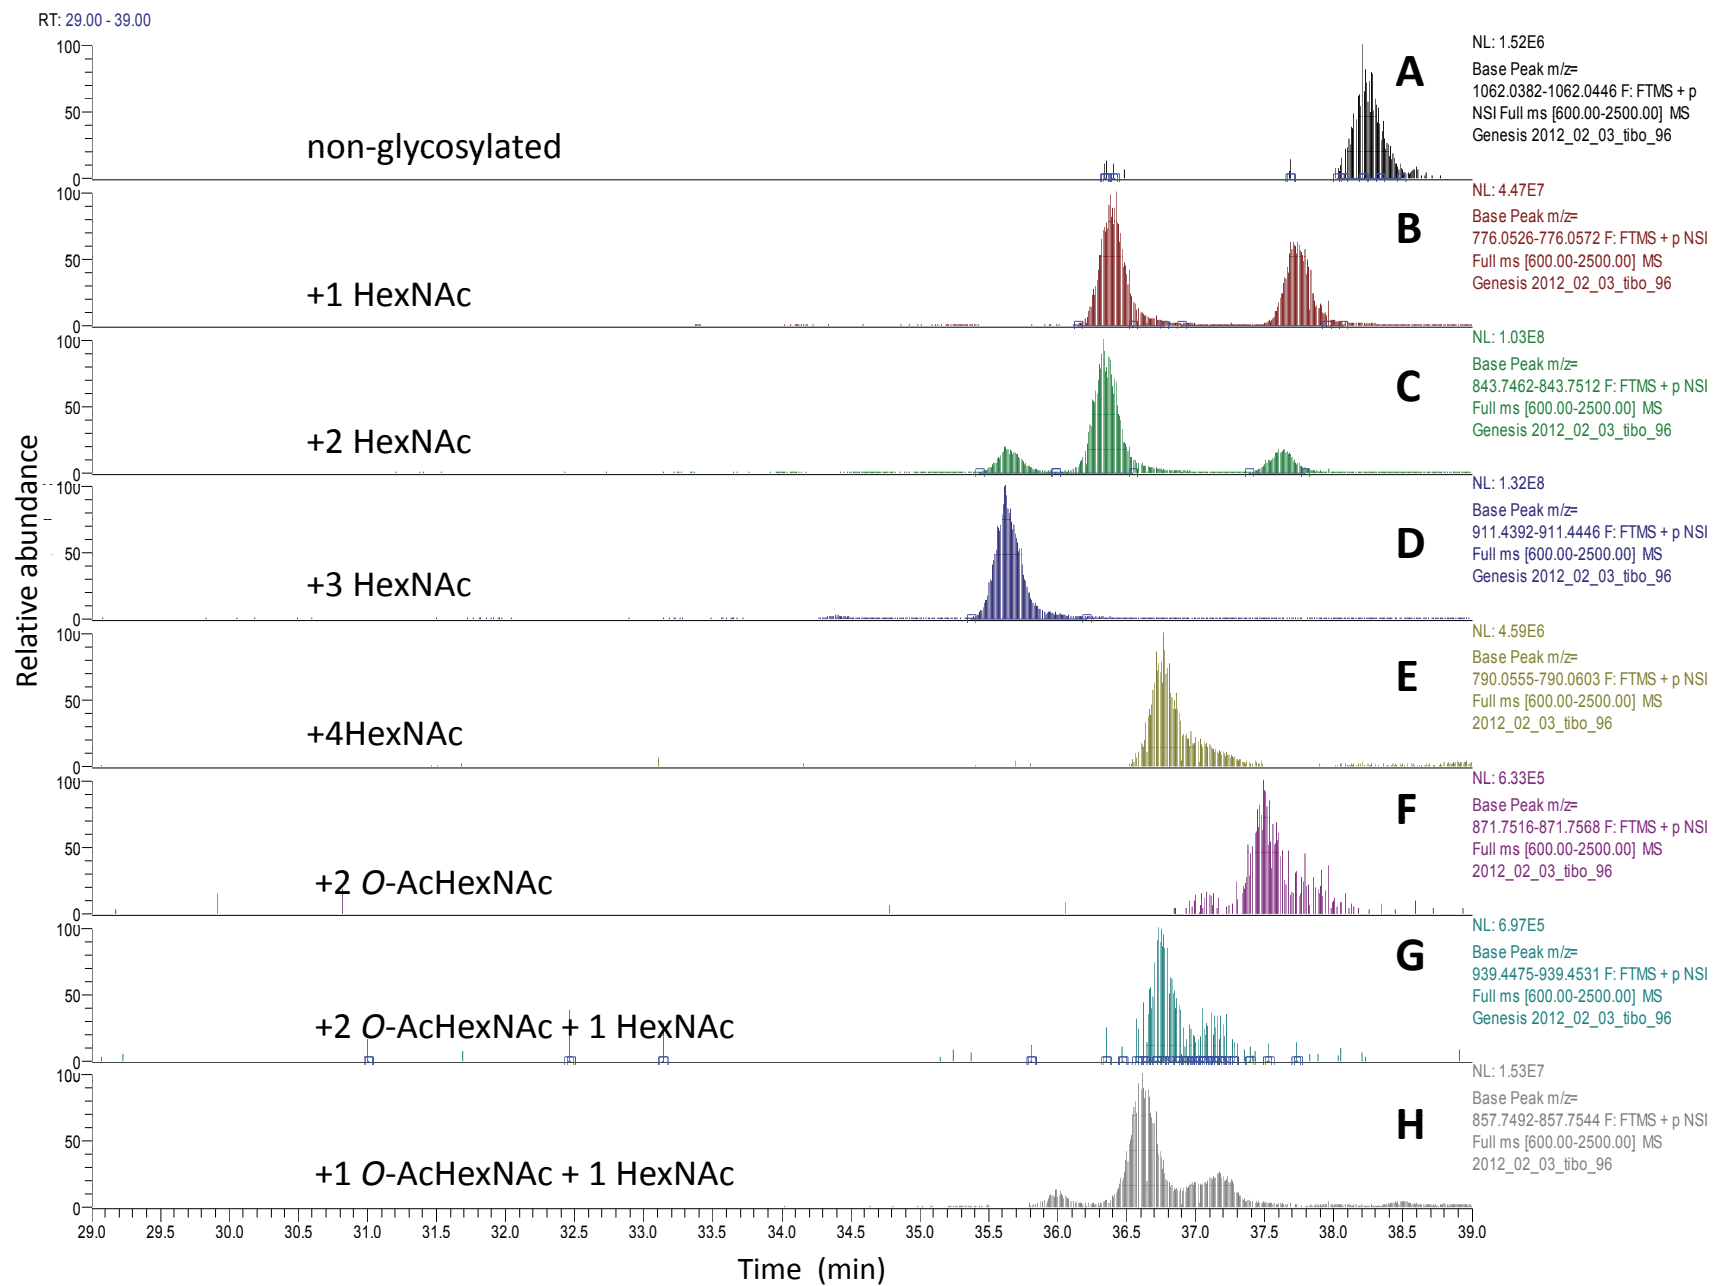

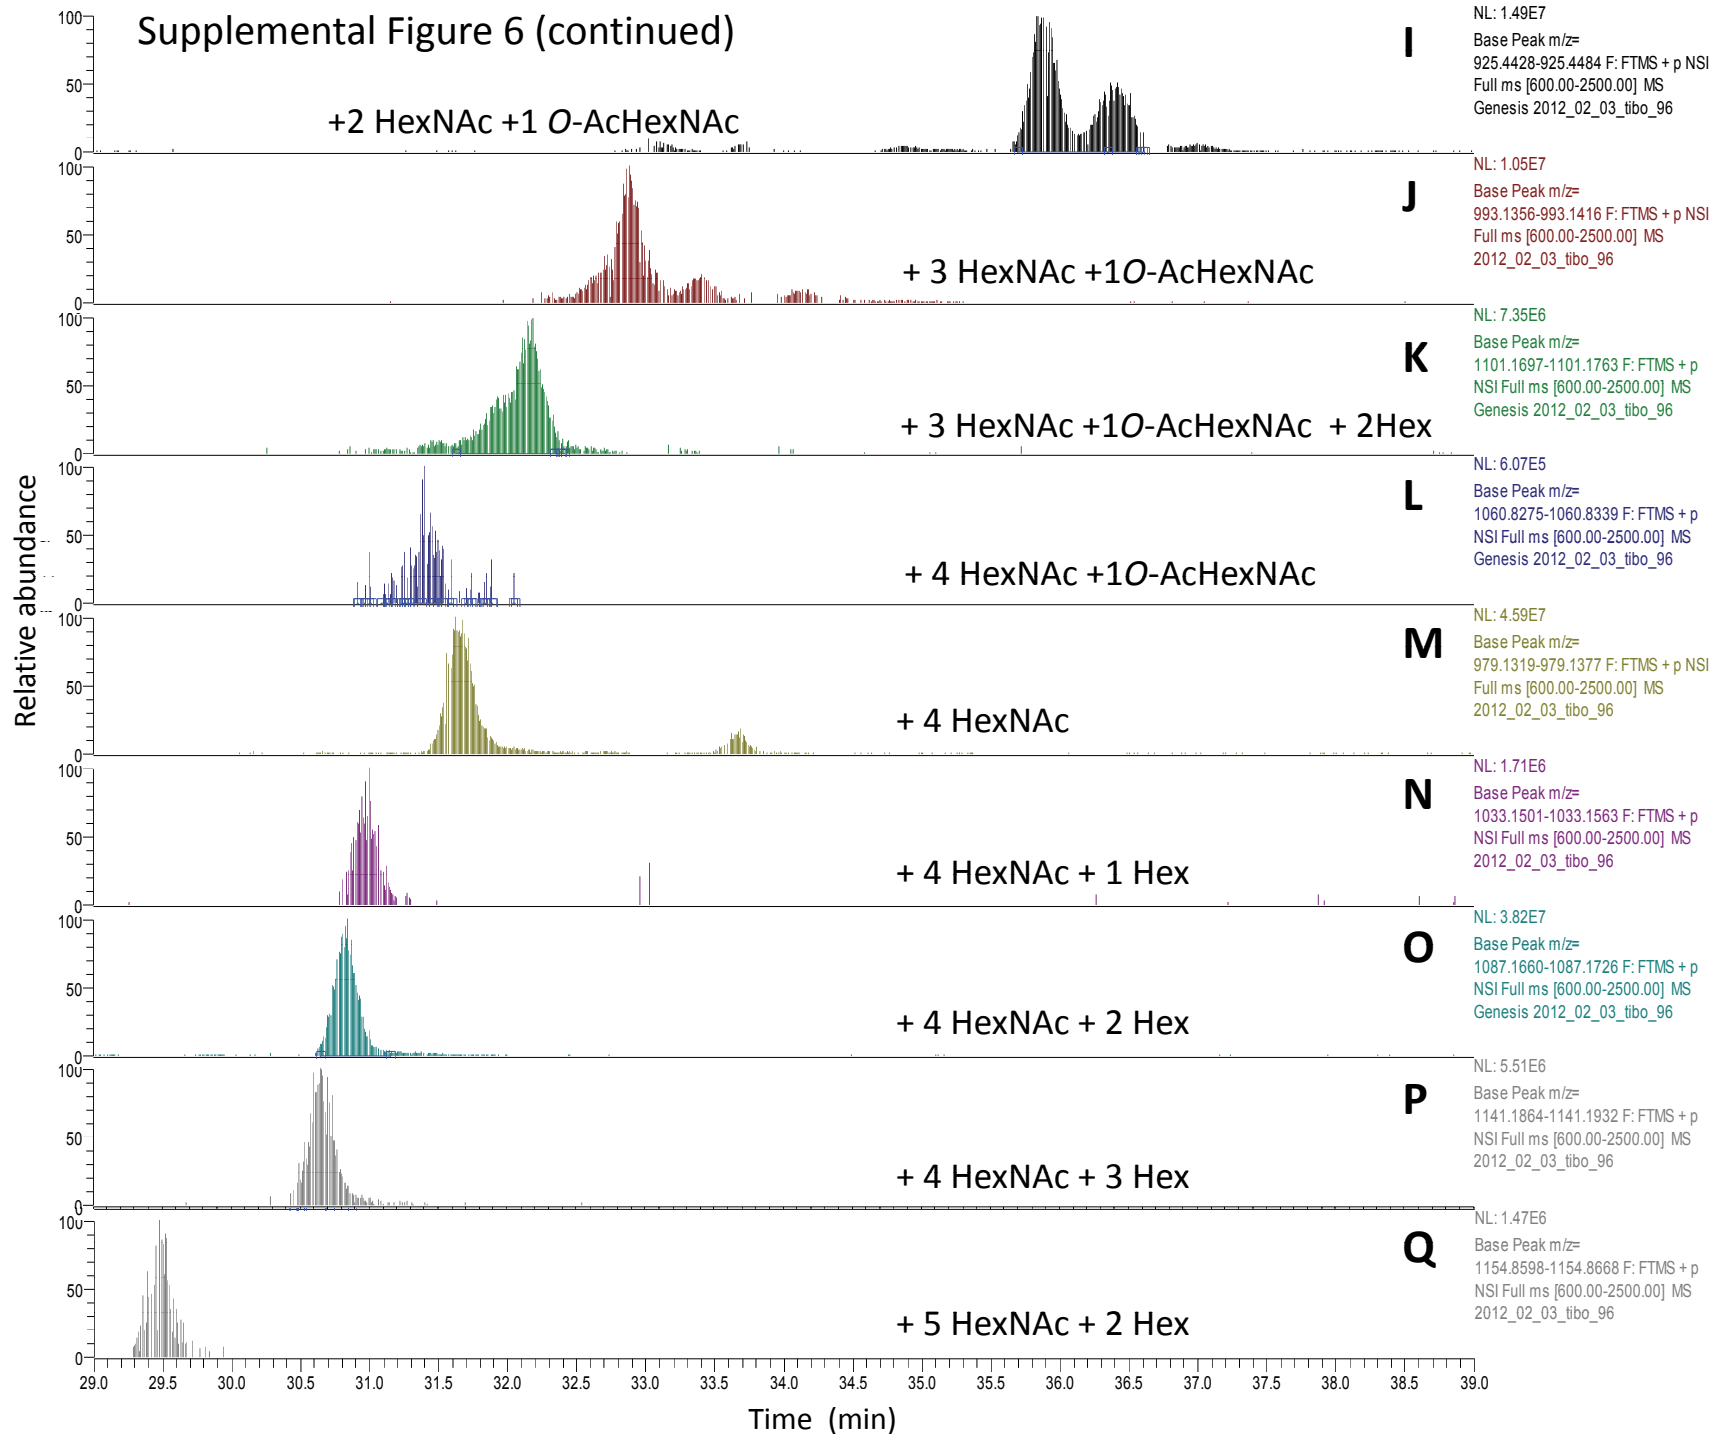

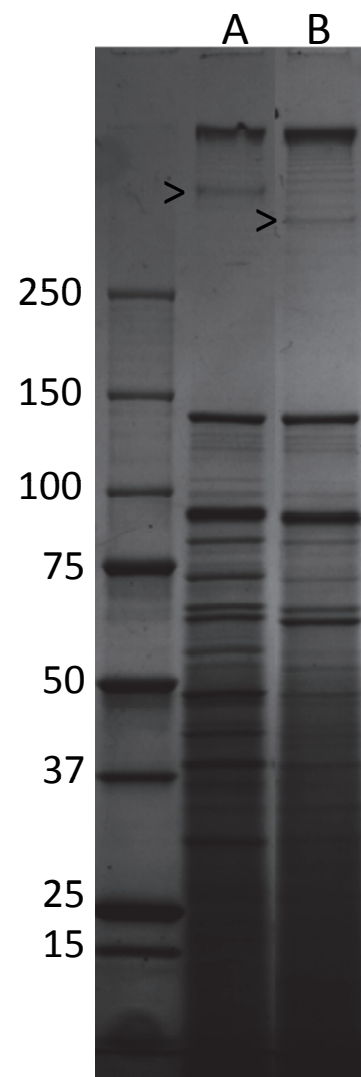

Supplemental Figure 7

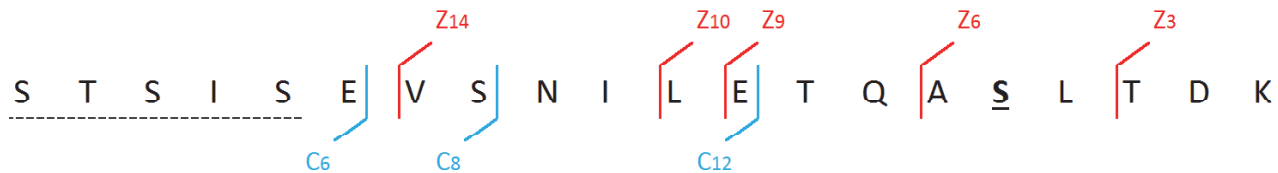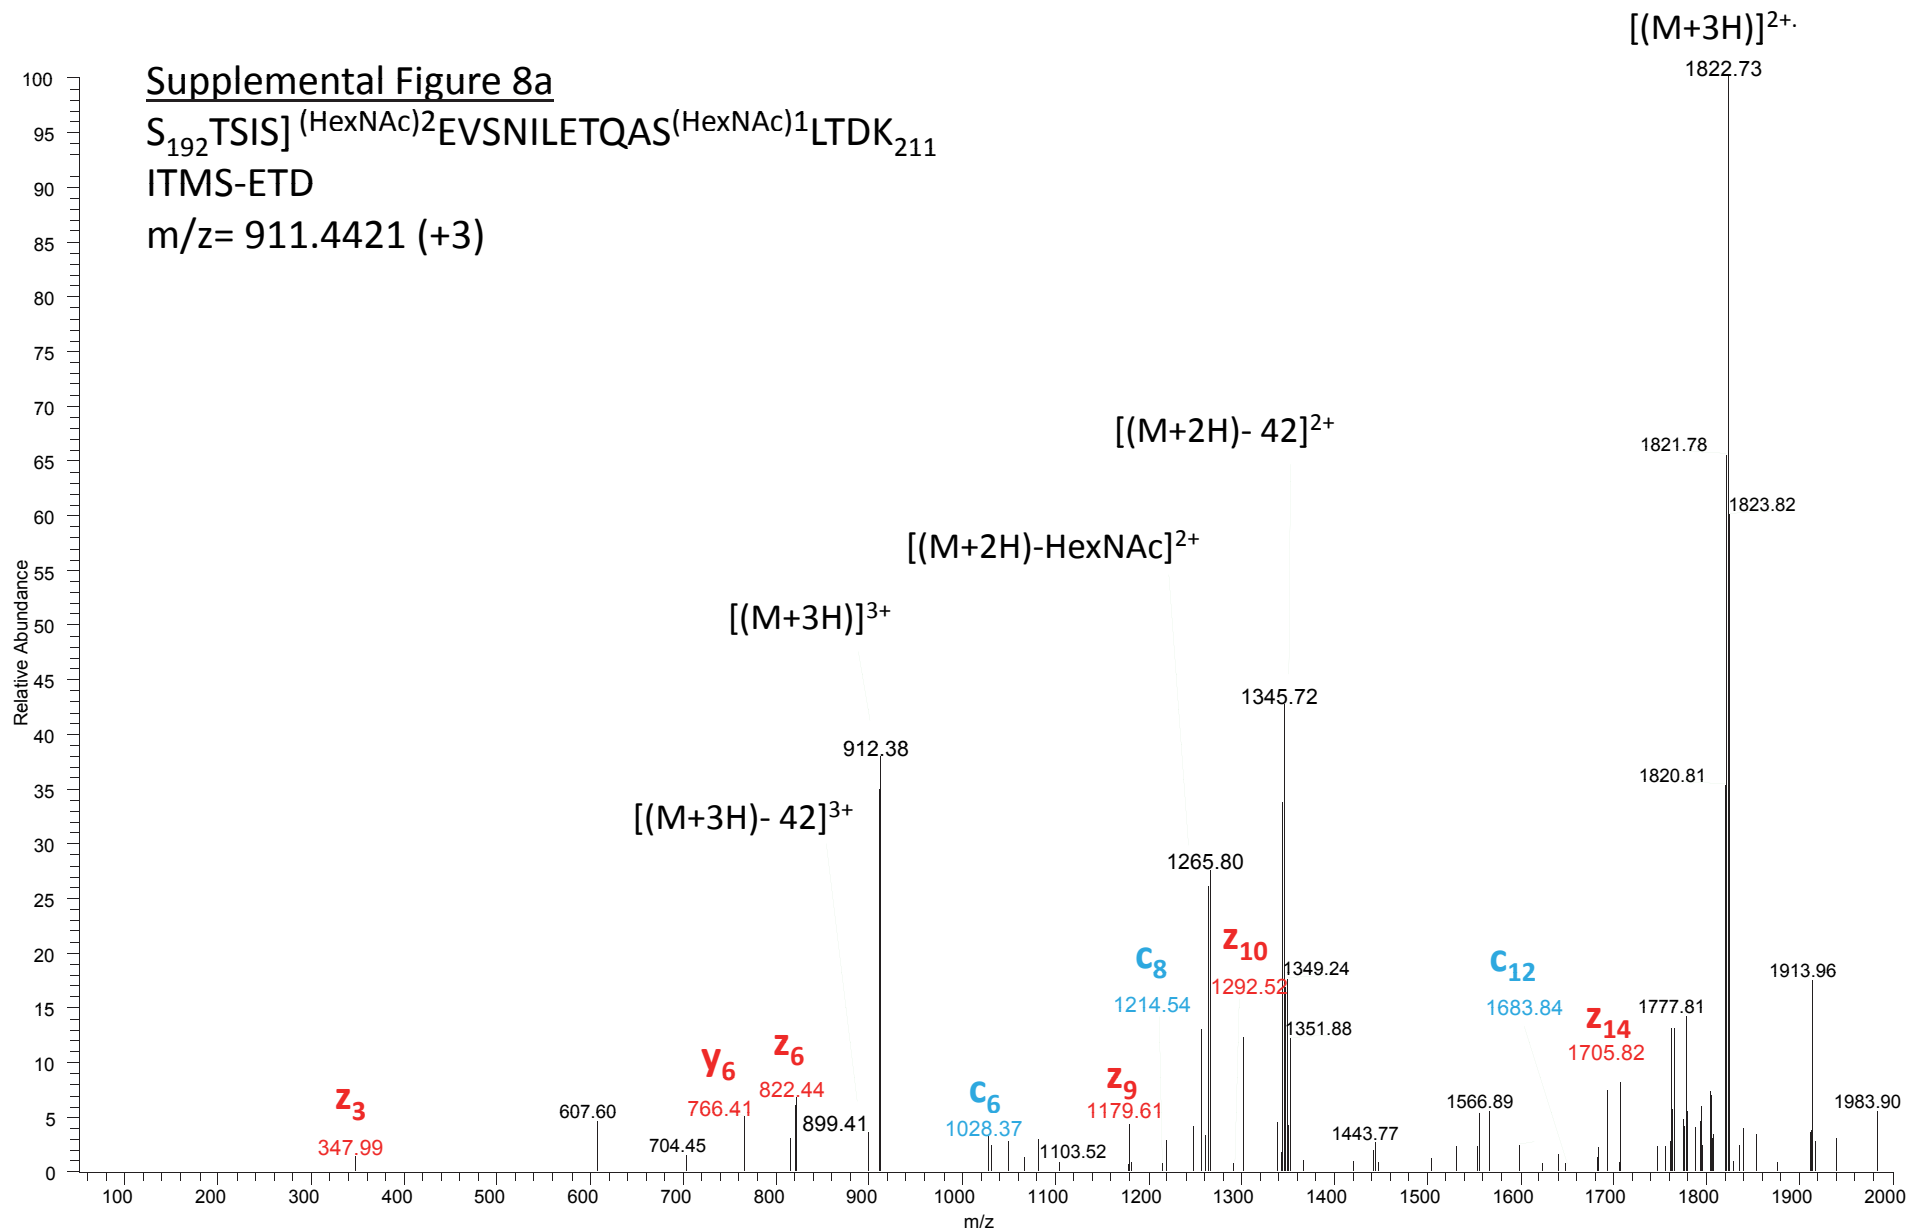

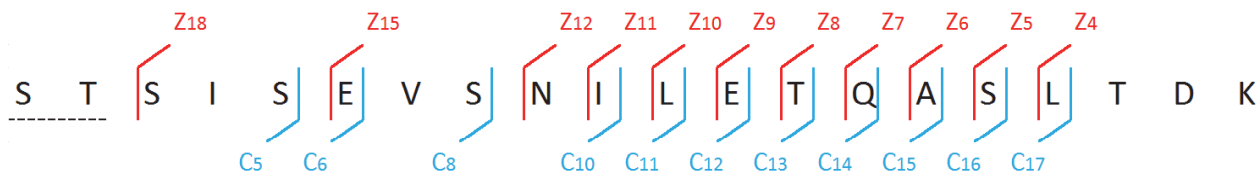

$[(M+2H)]^{2+}$   
1163.93

**Supplemental Figure 8b**

$S_{192}T]^{(HexNac)1}SISEVSNILETQASLTDK_{211}$

ITMS-ETD

$m/z = 776.0556 (+3)$

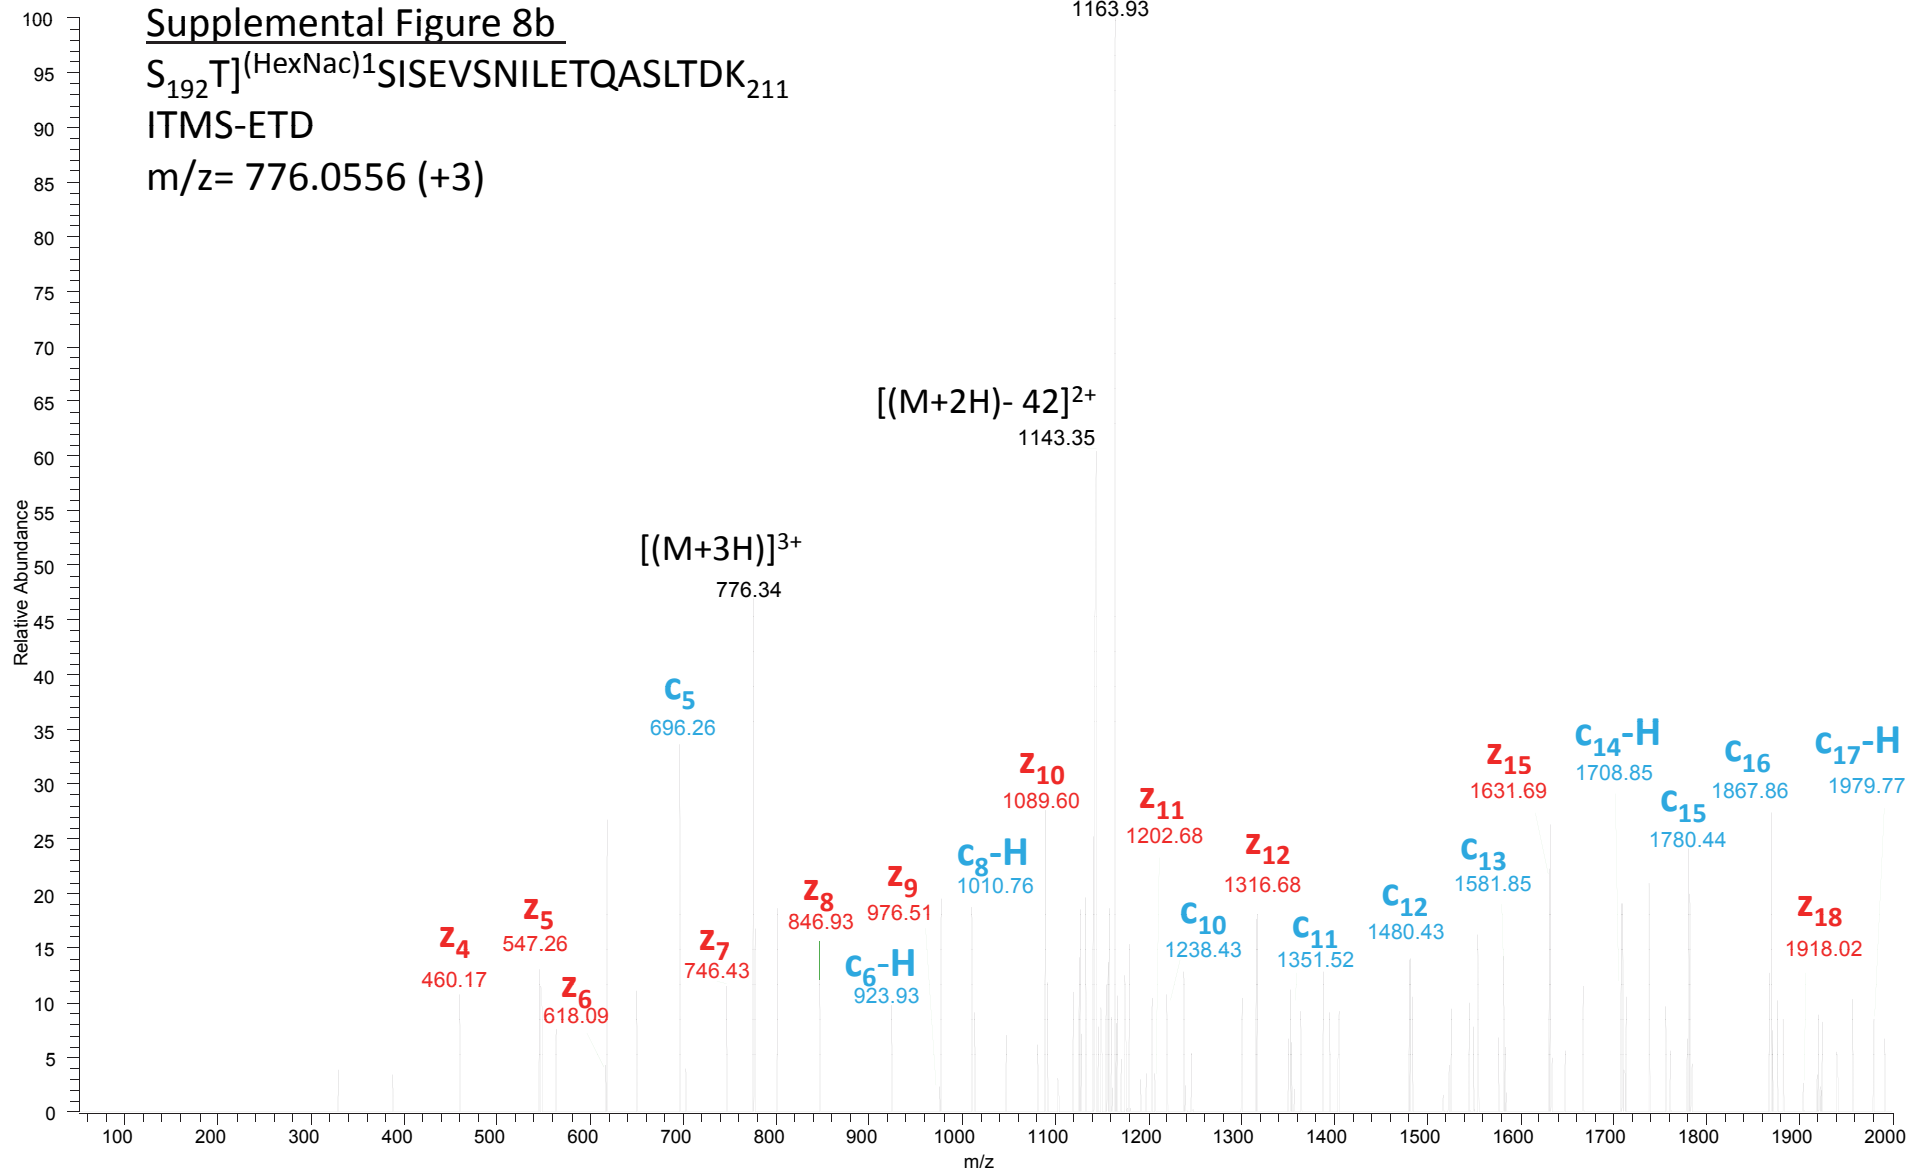

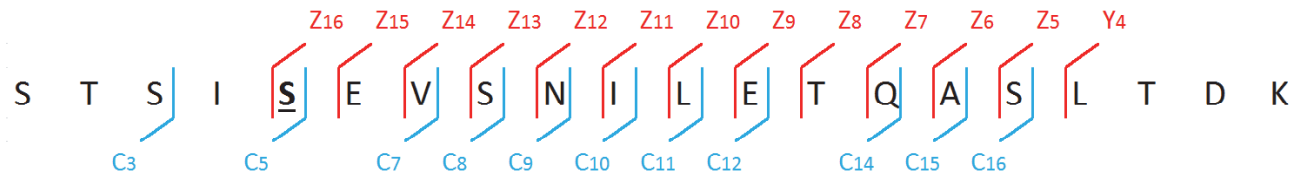

Supplemental Figure 8c

S<sub>192</sub>TSIS(O-AcHexNAc)<sub>1</sub>EVSNILETQASLTDK<sub>211</sub>

ITMS-ETD

m/z = 790.0590 (+3)

Z'<sub>x</sub> : Z<sub>x</sub> + H<sup>+</sup>

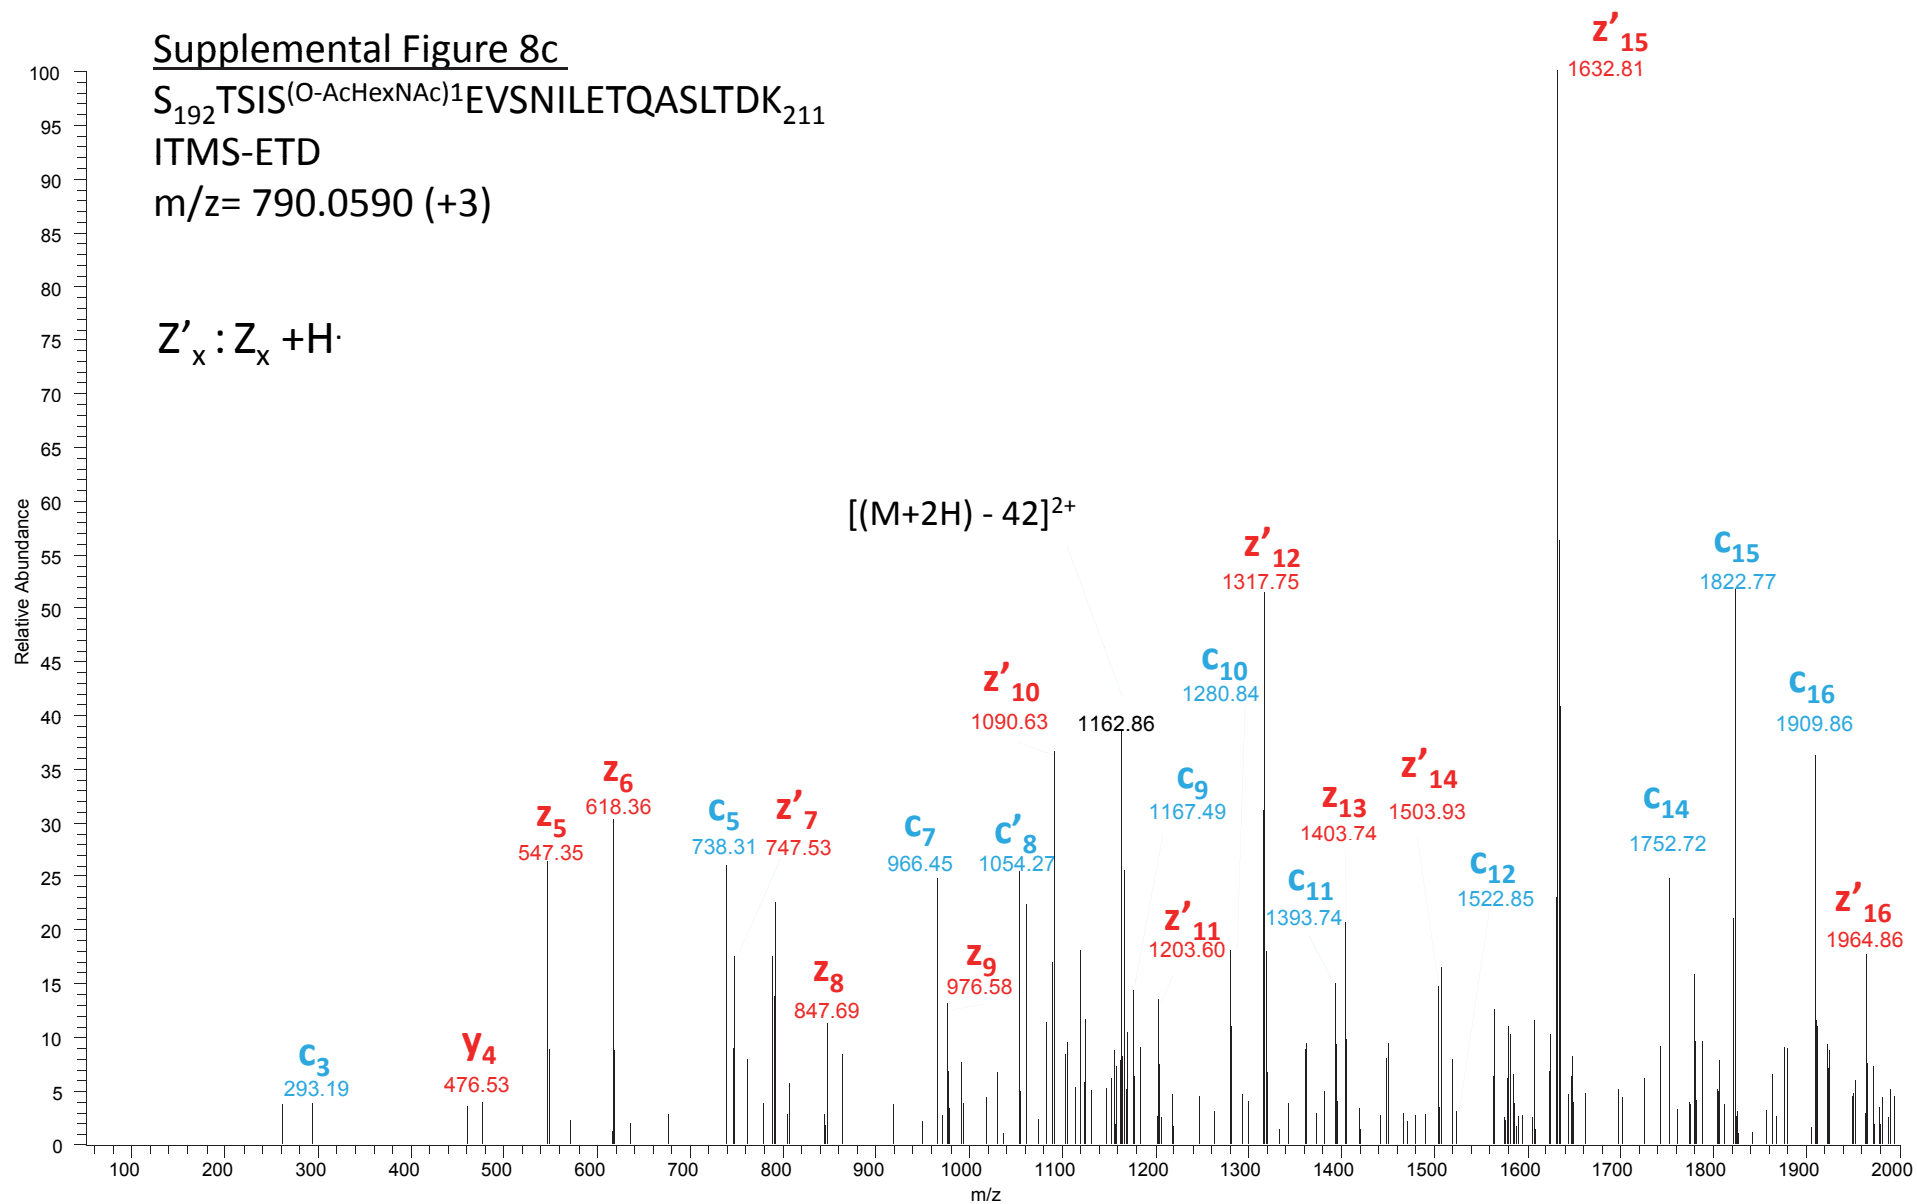



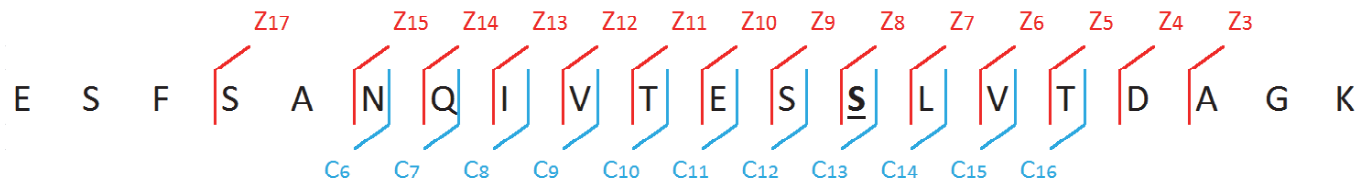

Supplemental Figure 8d

E<sub>214</sub>SFSANQIVTESS<sup>(HexNAc)<sub>1</sub></sup>LVTDA GK<sub>233</sub>

ITMS-ETD

m/z = 762.7047 (+3)

mean scan of 5 MS/MS

$$Z'_x : Z_x + H$$

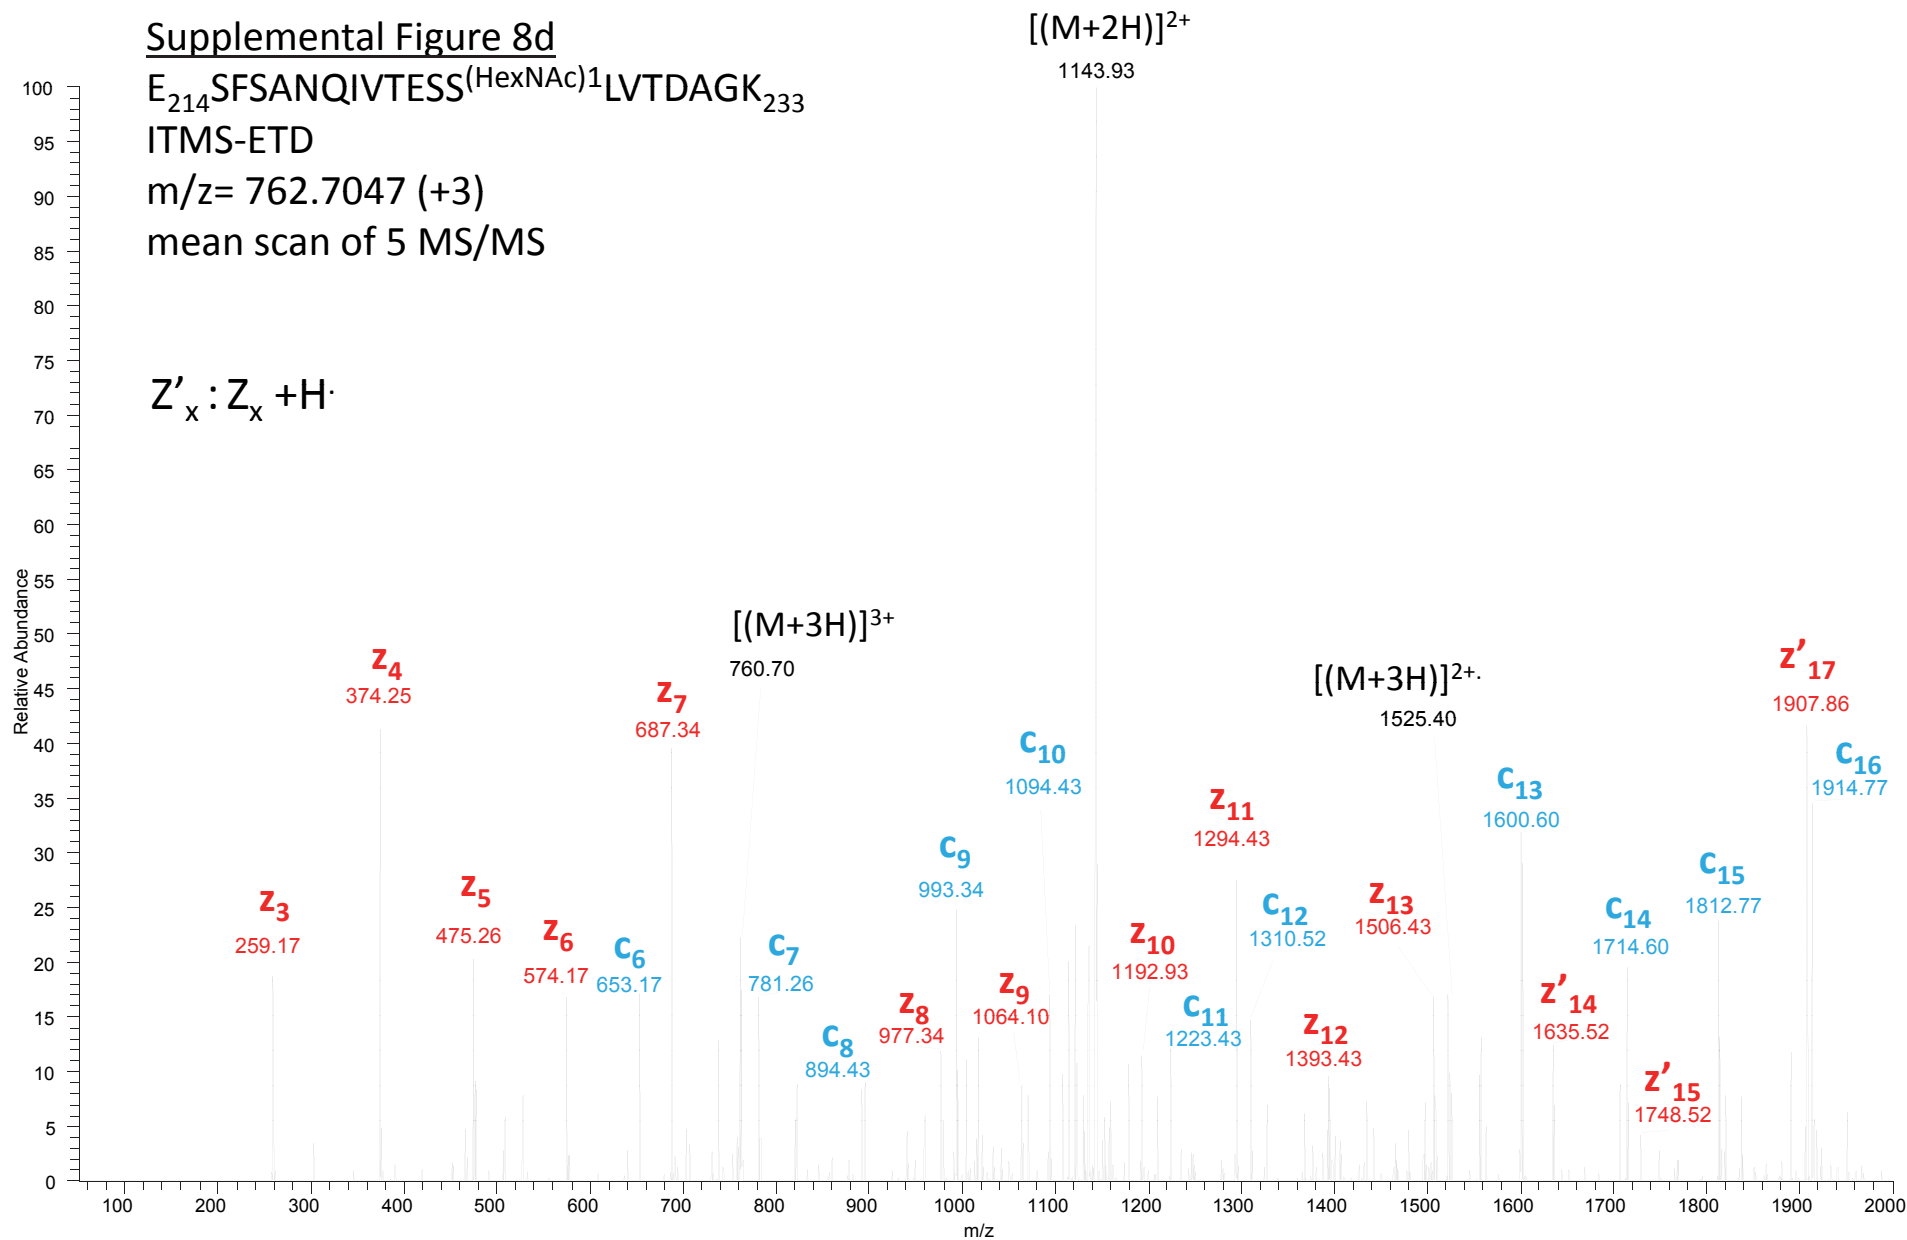

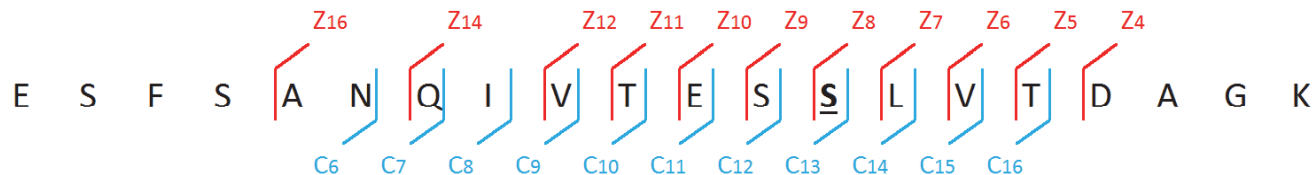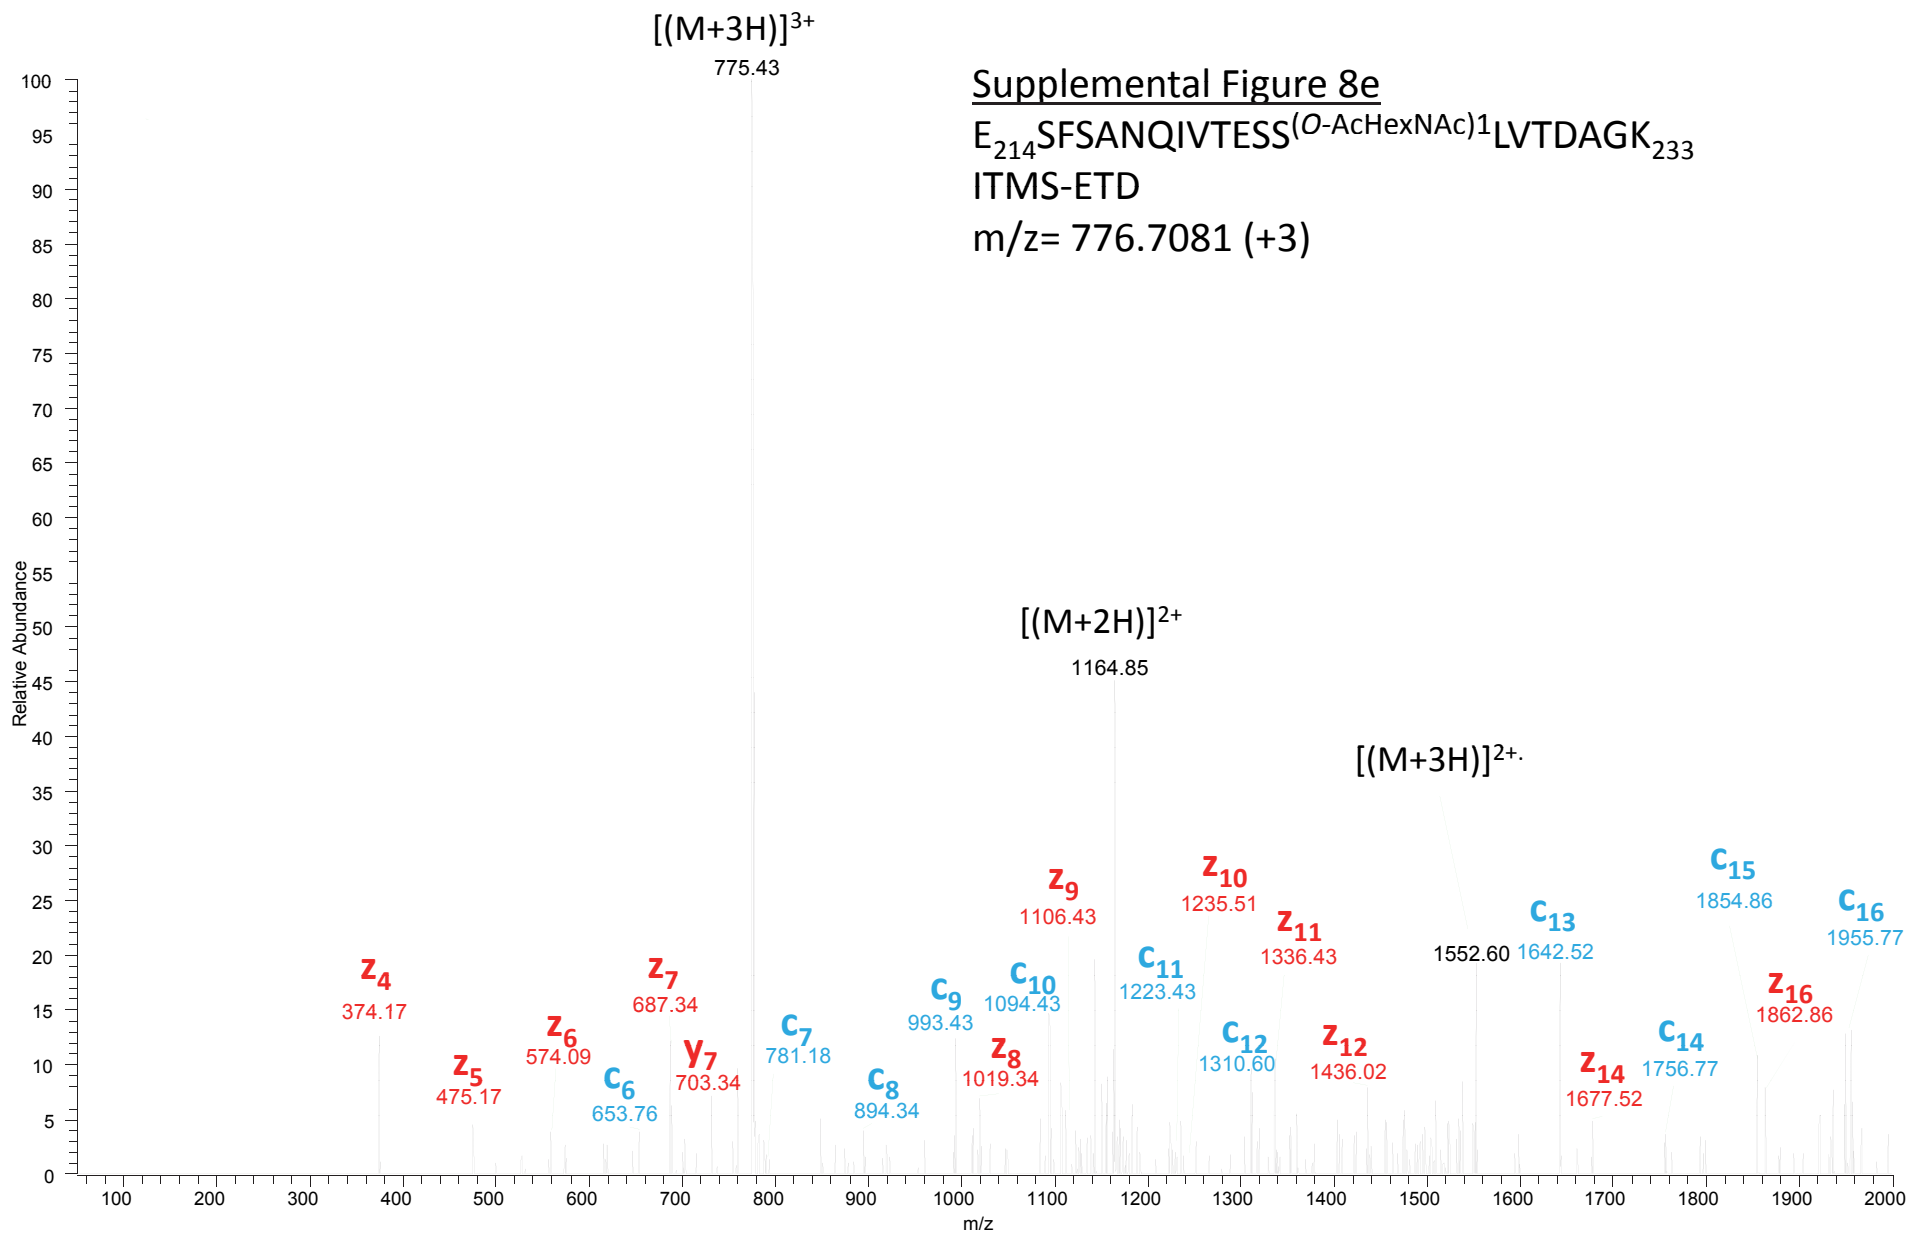

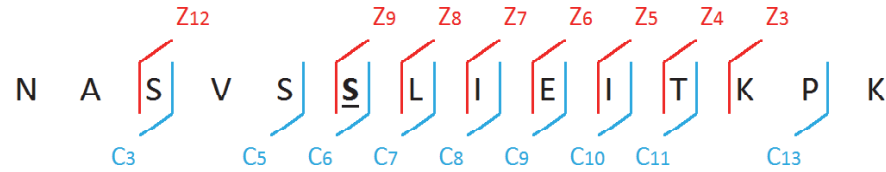

Supplemental Figure 8f

N<sub>234</sub>ASVSS<sup>(HexNAc)<sup>1</sup></sup>LIEITKPK<sub>247</sub>

ITMS-ETD

m/z = 563.9810 (+3)

Z'<sub>x</sub> : Z<sub>x</sub> + H<sup>+</sup>

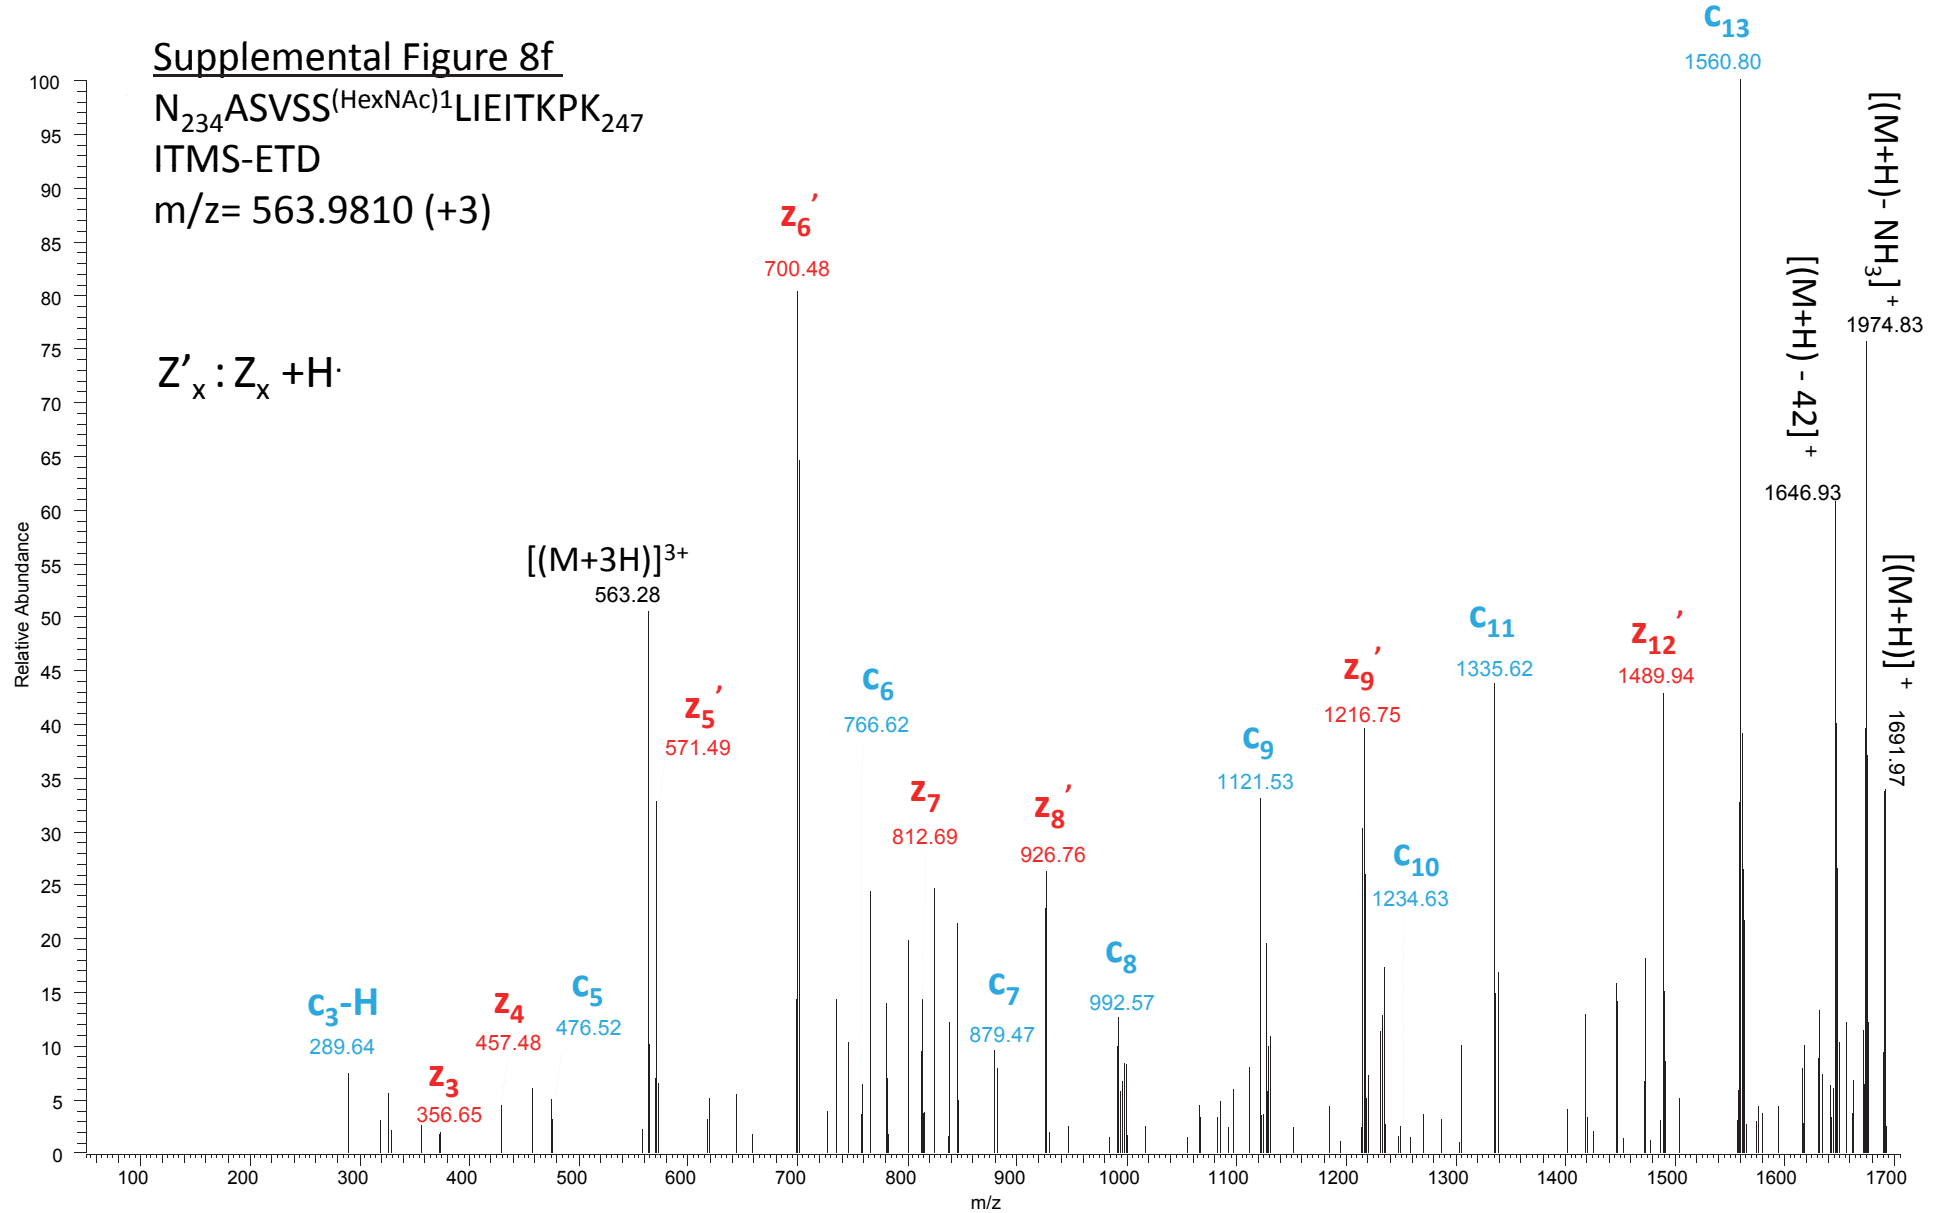

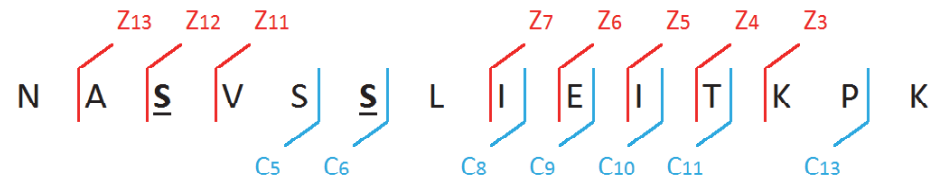

Supplemental Figure 8g

$N_{234}AS^{(HexNac)1}VSS^{(HexNac)1}LIEITKPK_{247}$

ITMS-ETD

$m/z = 631.6742 (+3)$

$Z'_x : Z_x + H \cdot$

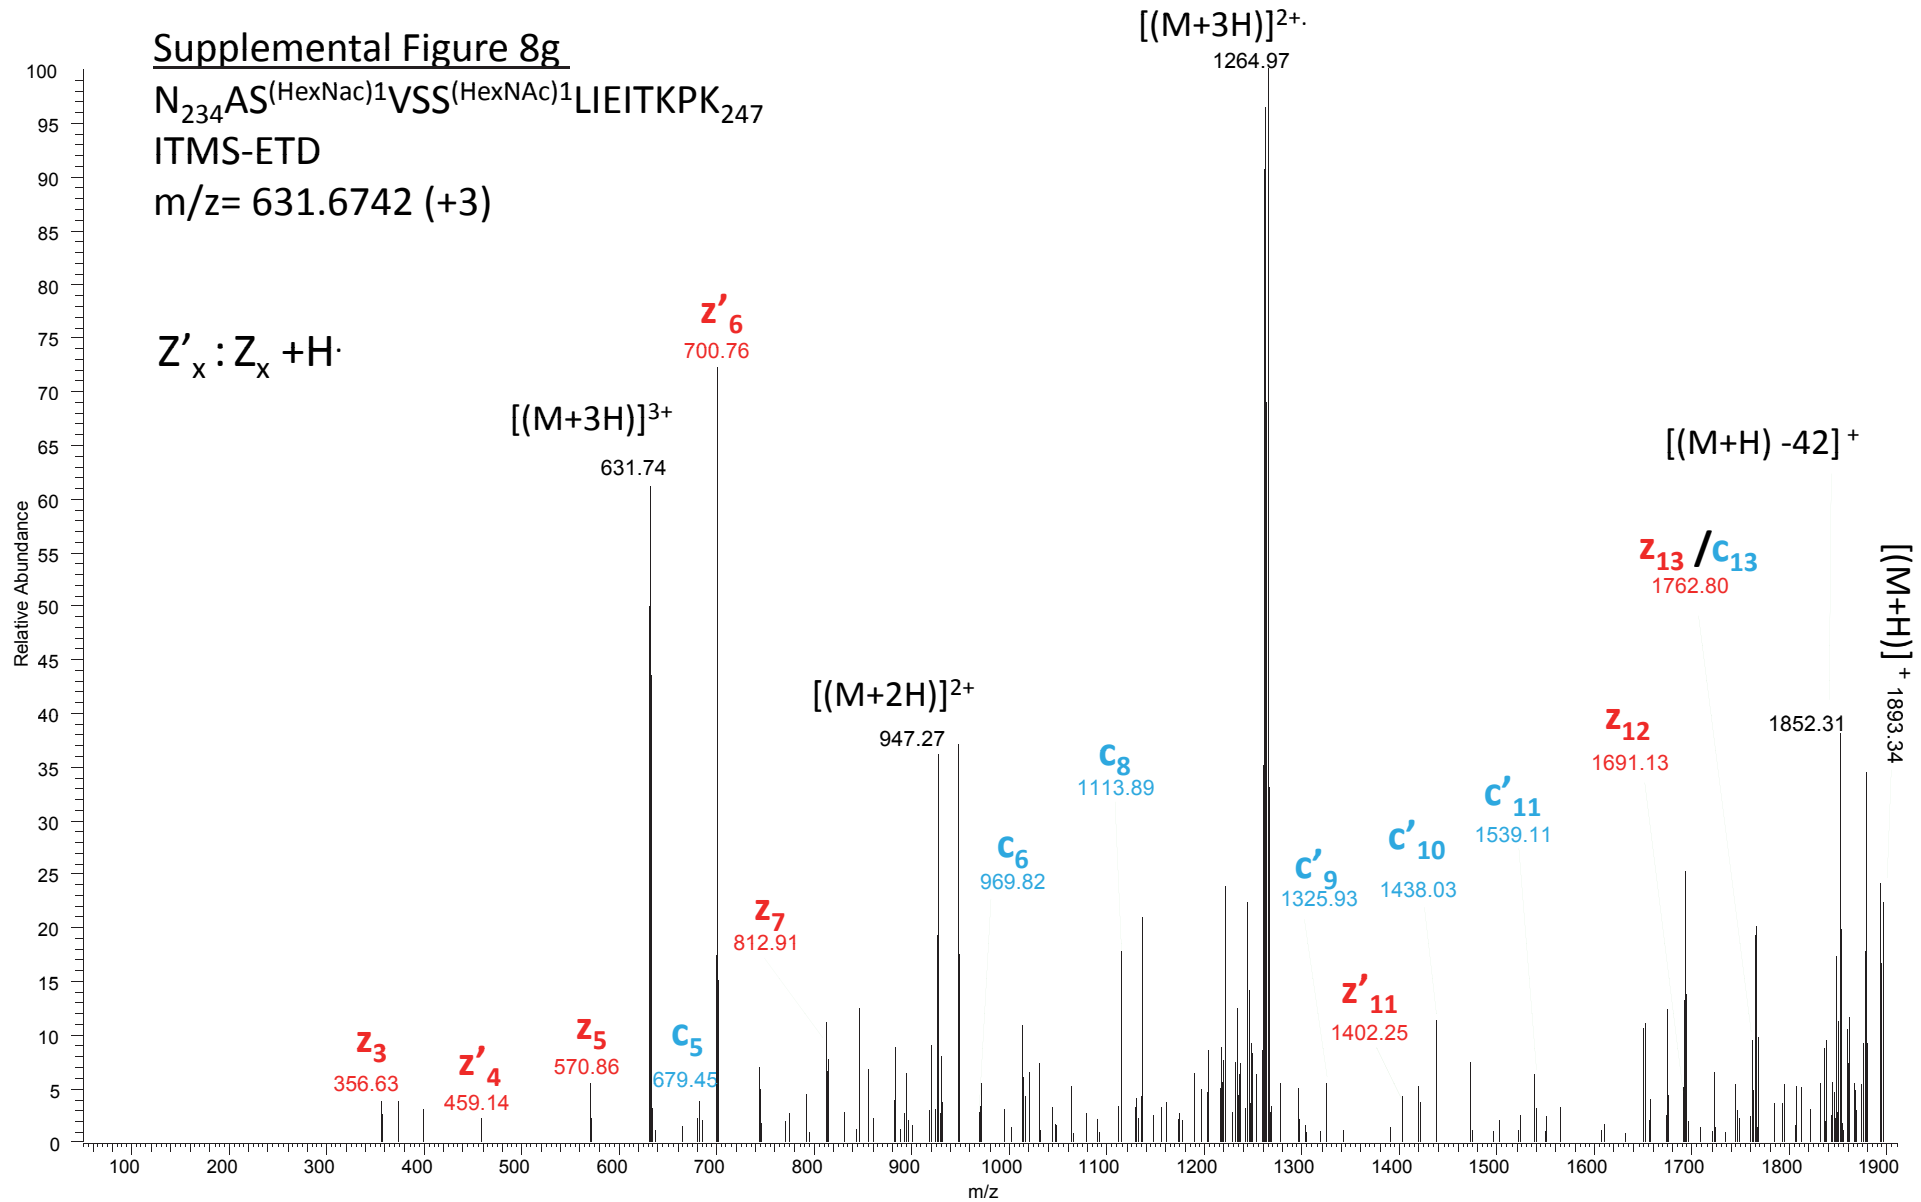

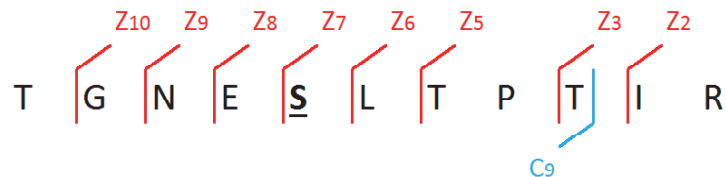

x2

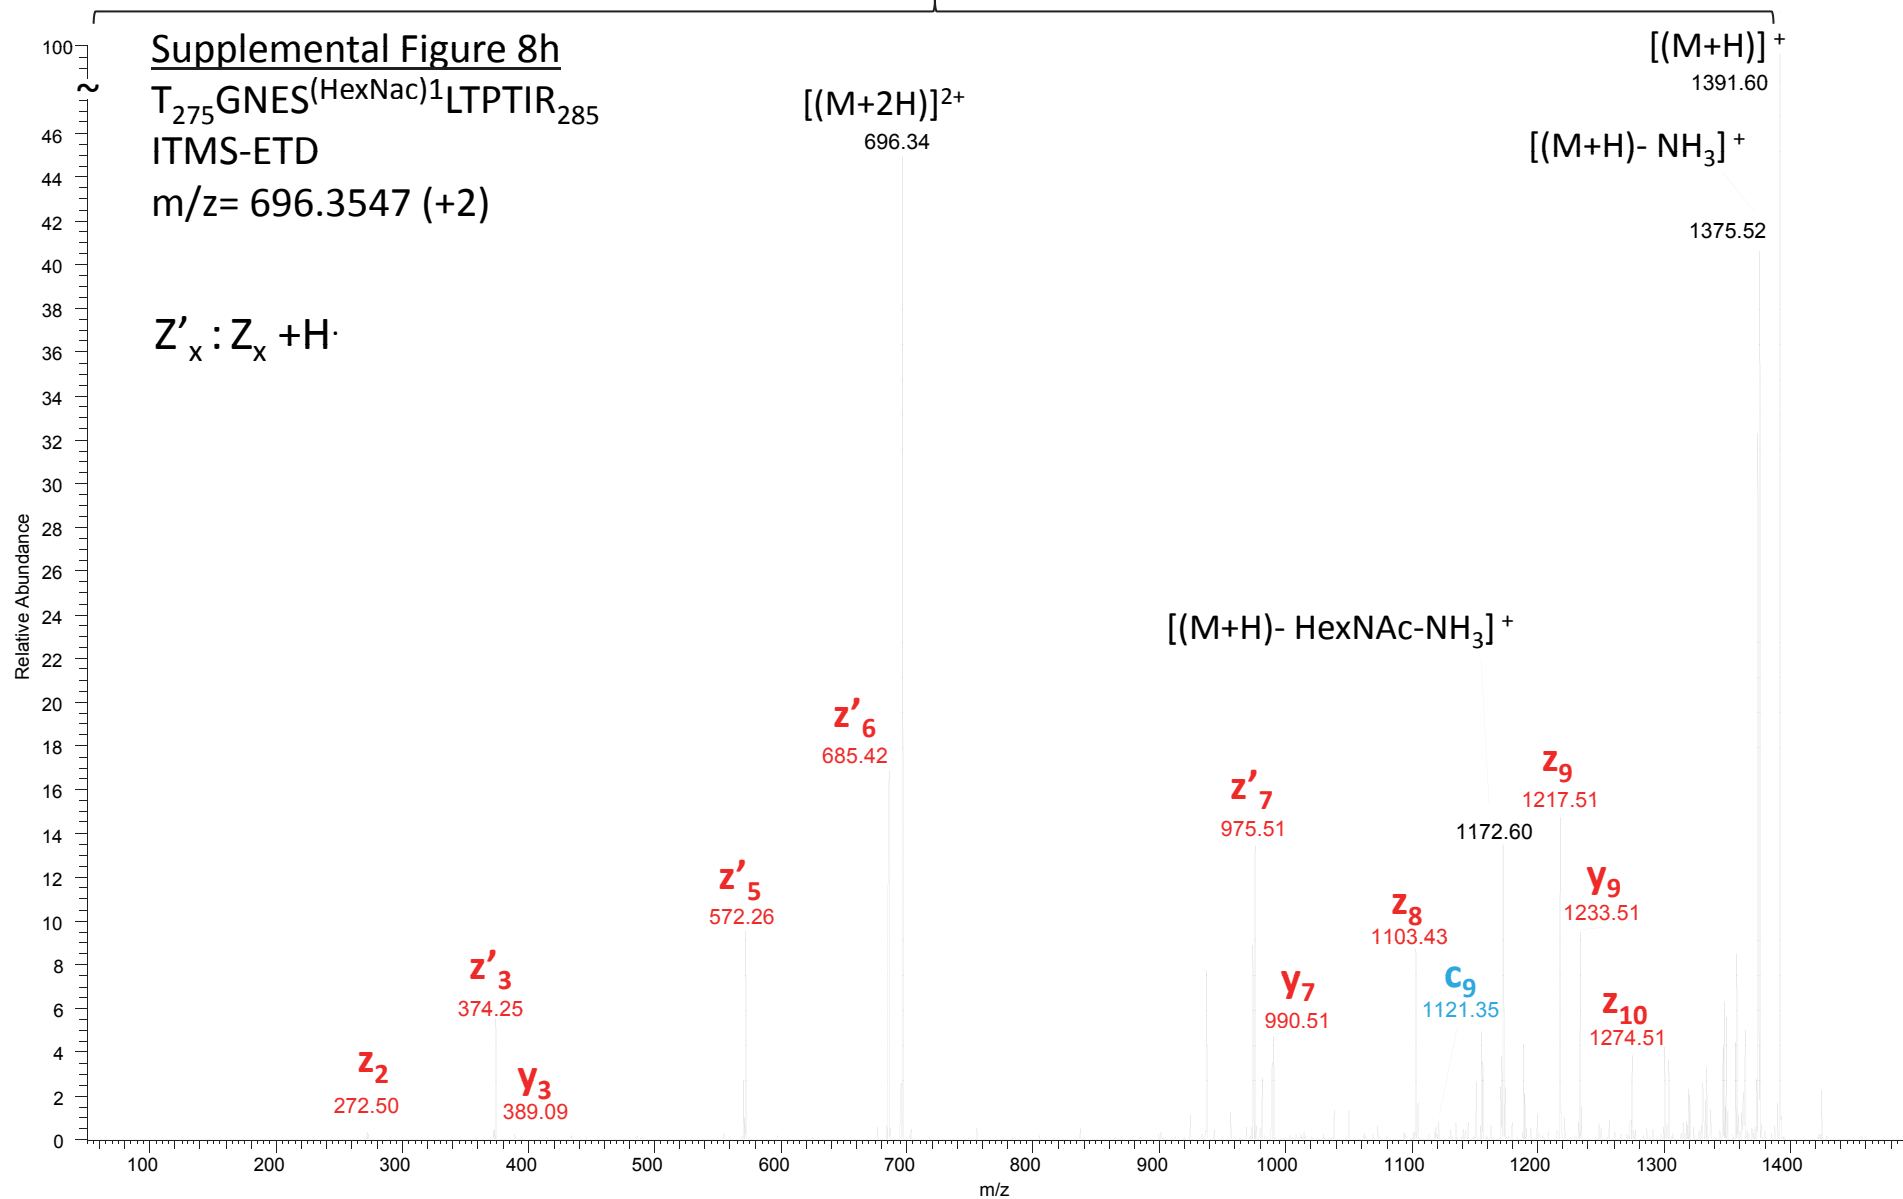

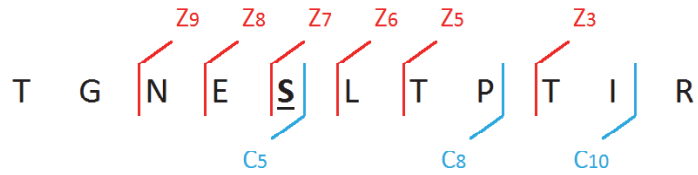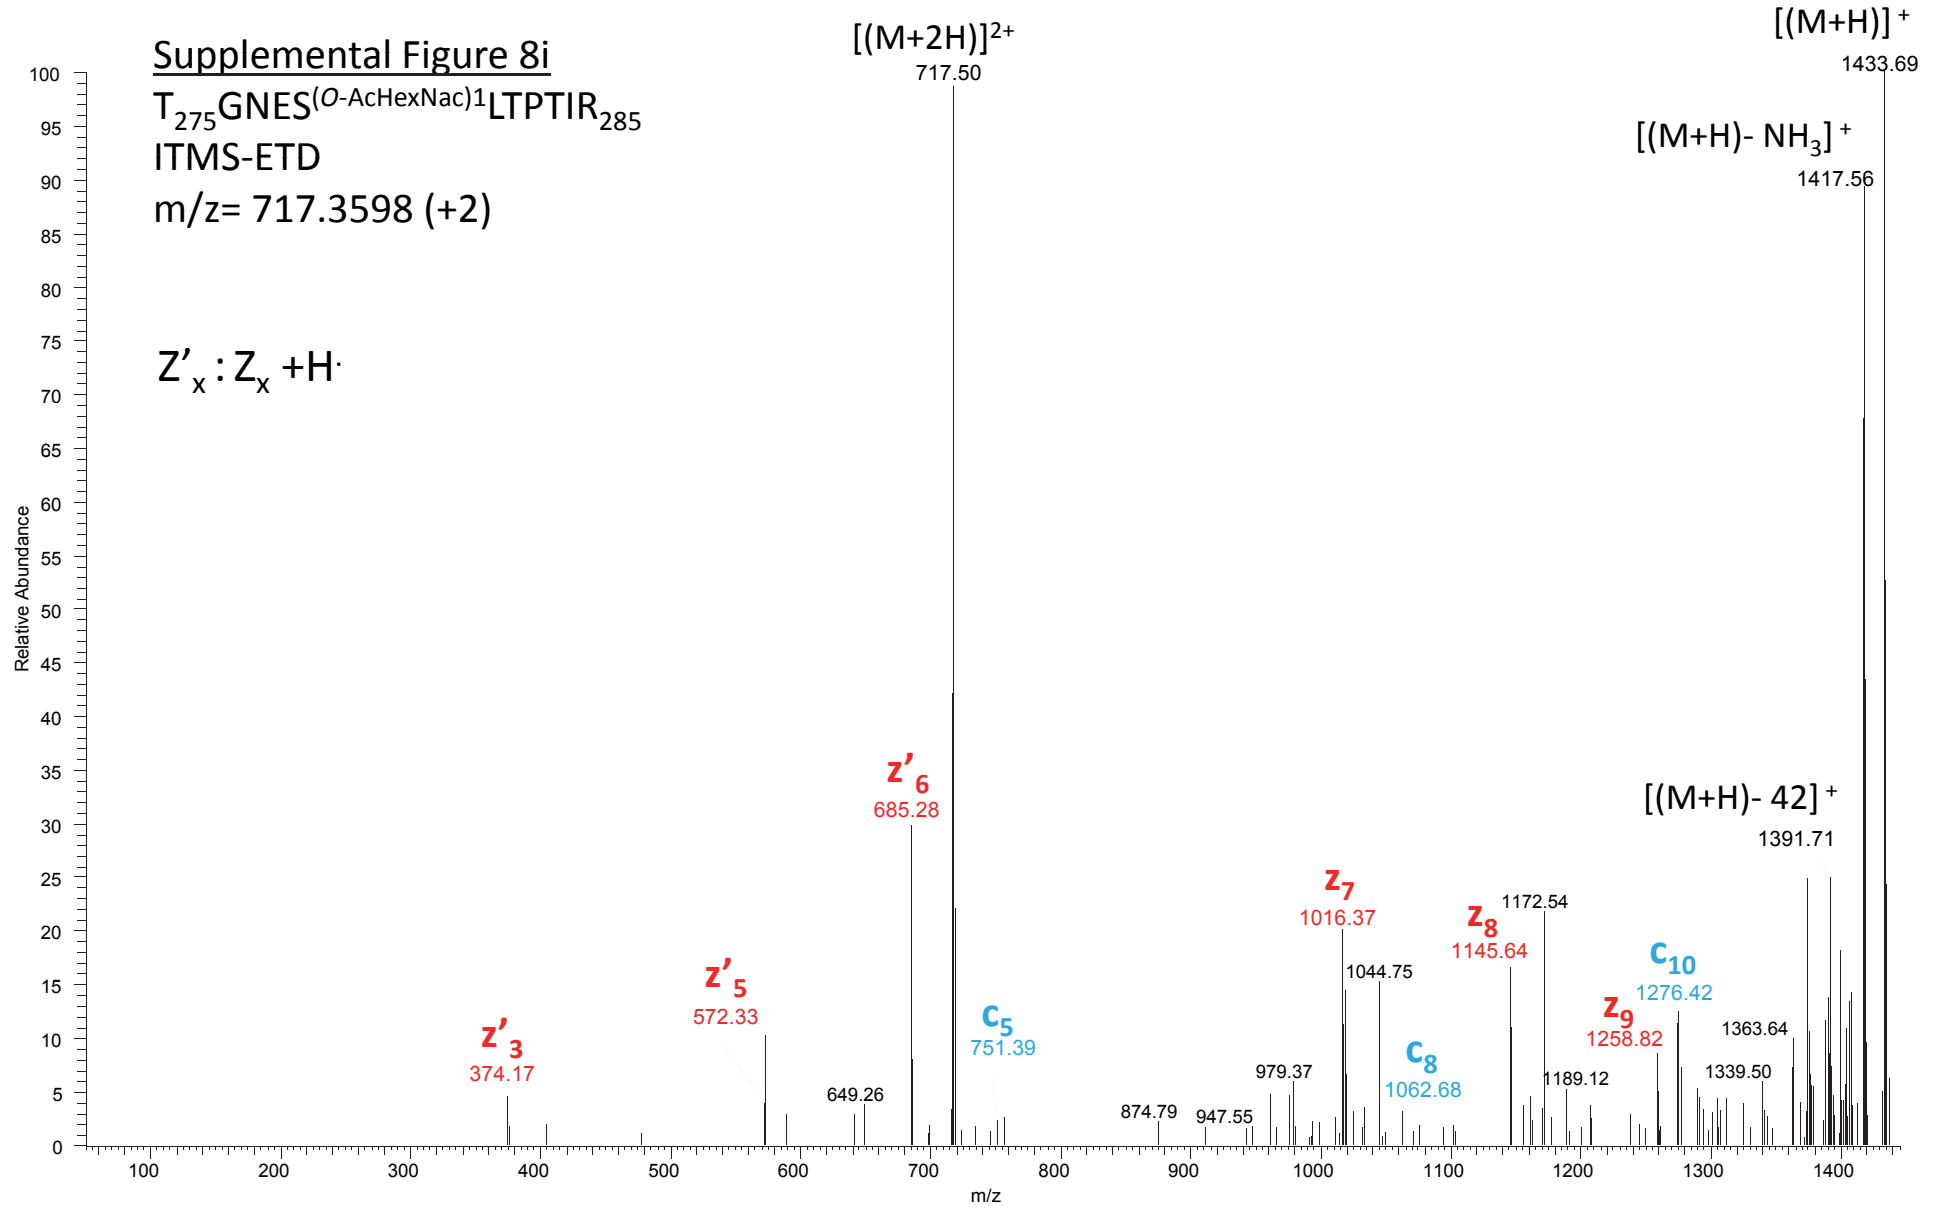

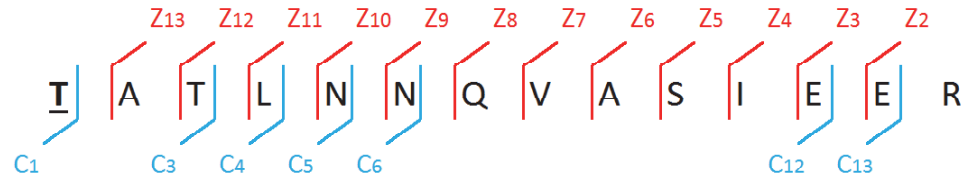

**Supplemental Figure 8j**

T<sub>451</sub> (HexNAc)<sub>1</sub>(O-AcHexNAc)<sub>1</sub> ATLNNQVASIEER<sub>464</sub>

ITMS-ETD

m/z = 665.6512 (+3)

Z'<sub>x</sub> : Z<sub>x</sub> + H<sup>•</sup>

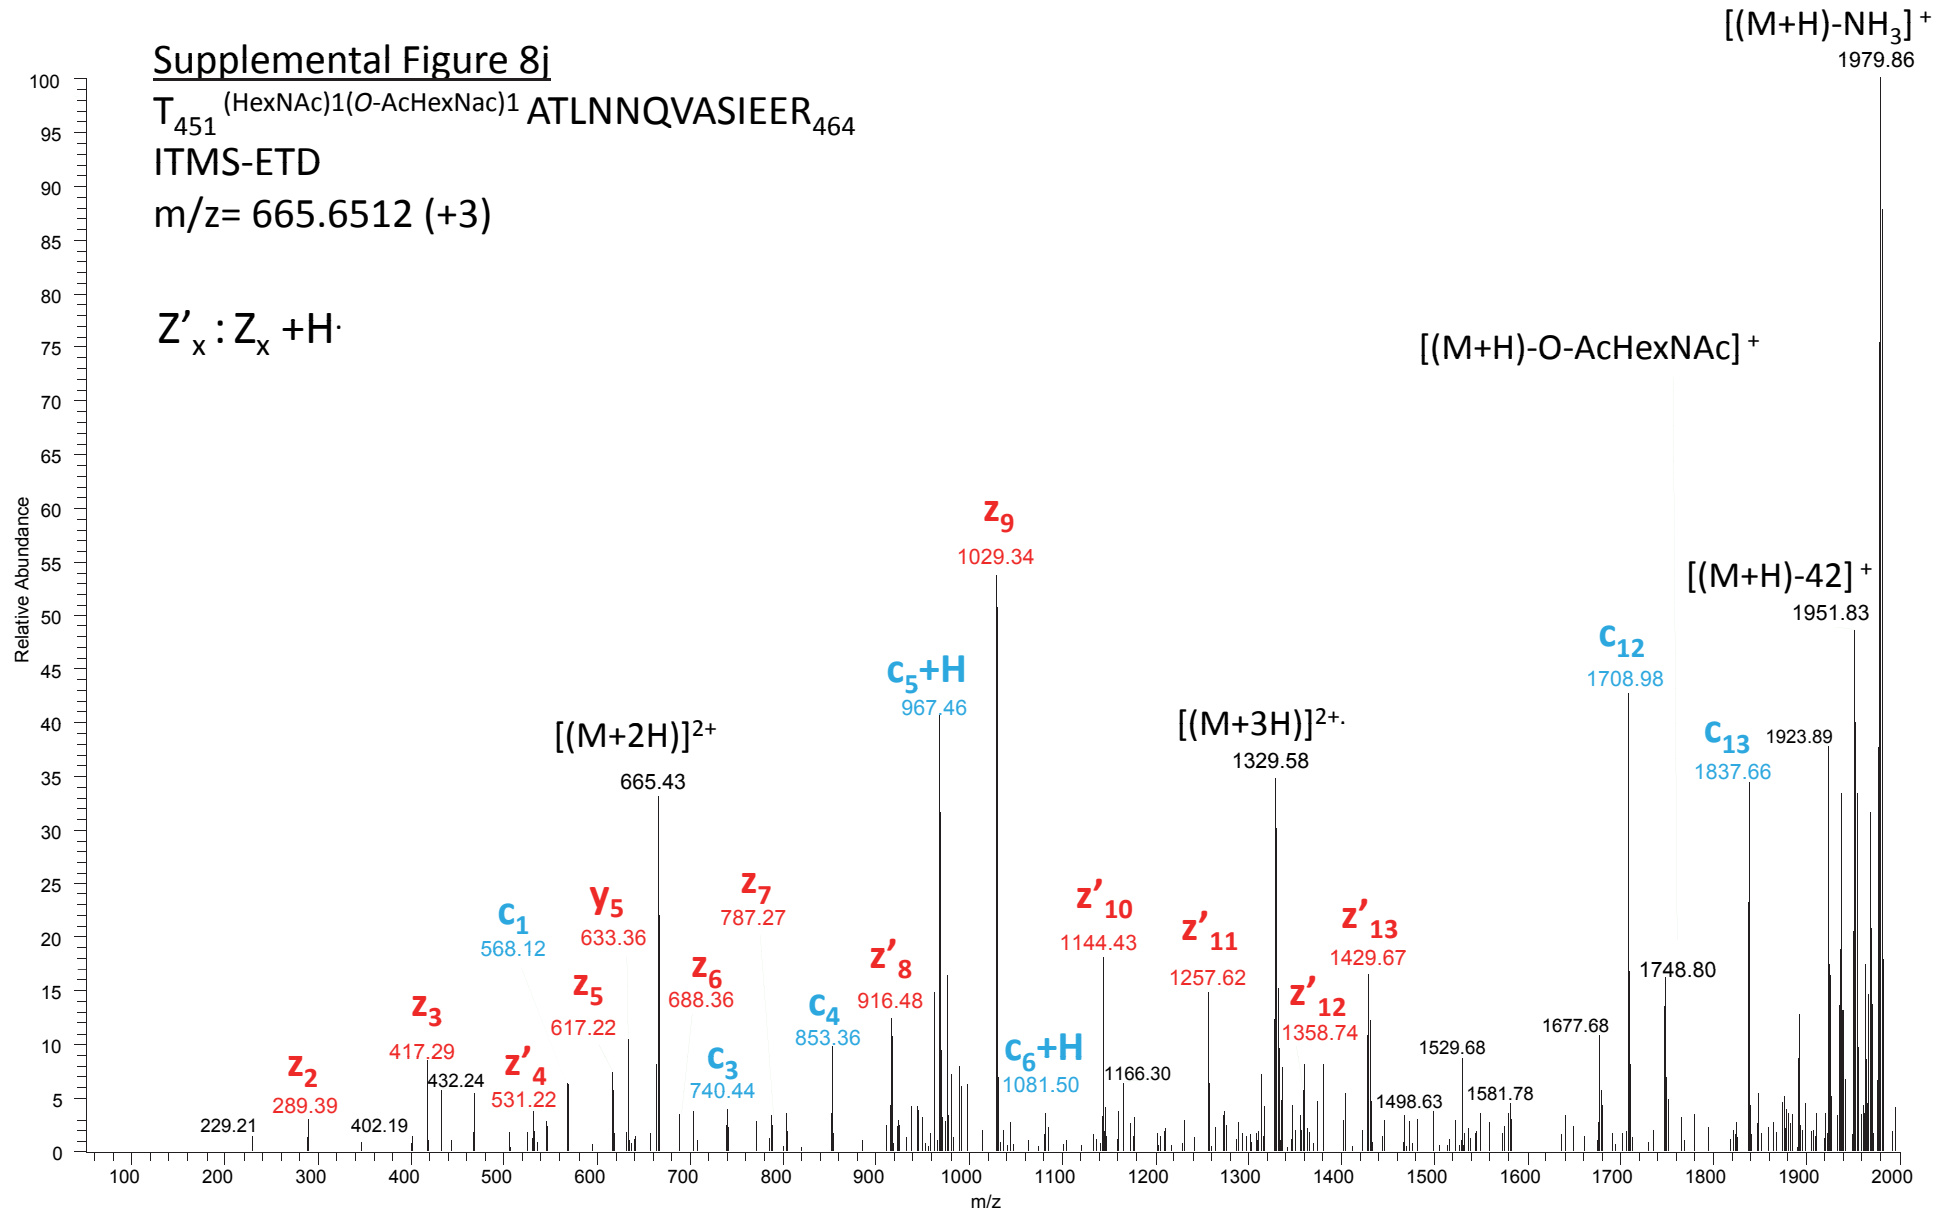

Supplement: supp_M114.038075_mcp.M114.038075-1.pdf [file supp_M114.038075_mcp.M114.038075-1.pdf]
